# Supplementary material for: Transcriptome Atlases of Mouse Brain Reveals Differential Expression Across Brain Regions and Genetic Backgrounds
Source: Oxford University Press journal article supplement (doi:10.1534/g3.111.001602), 2012-02-01

1

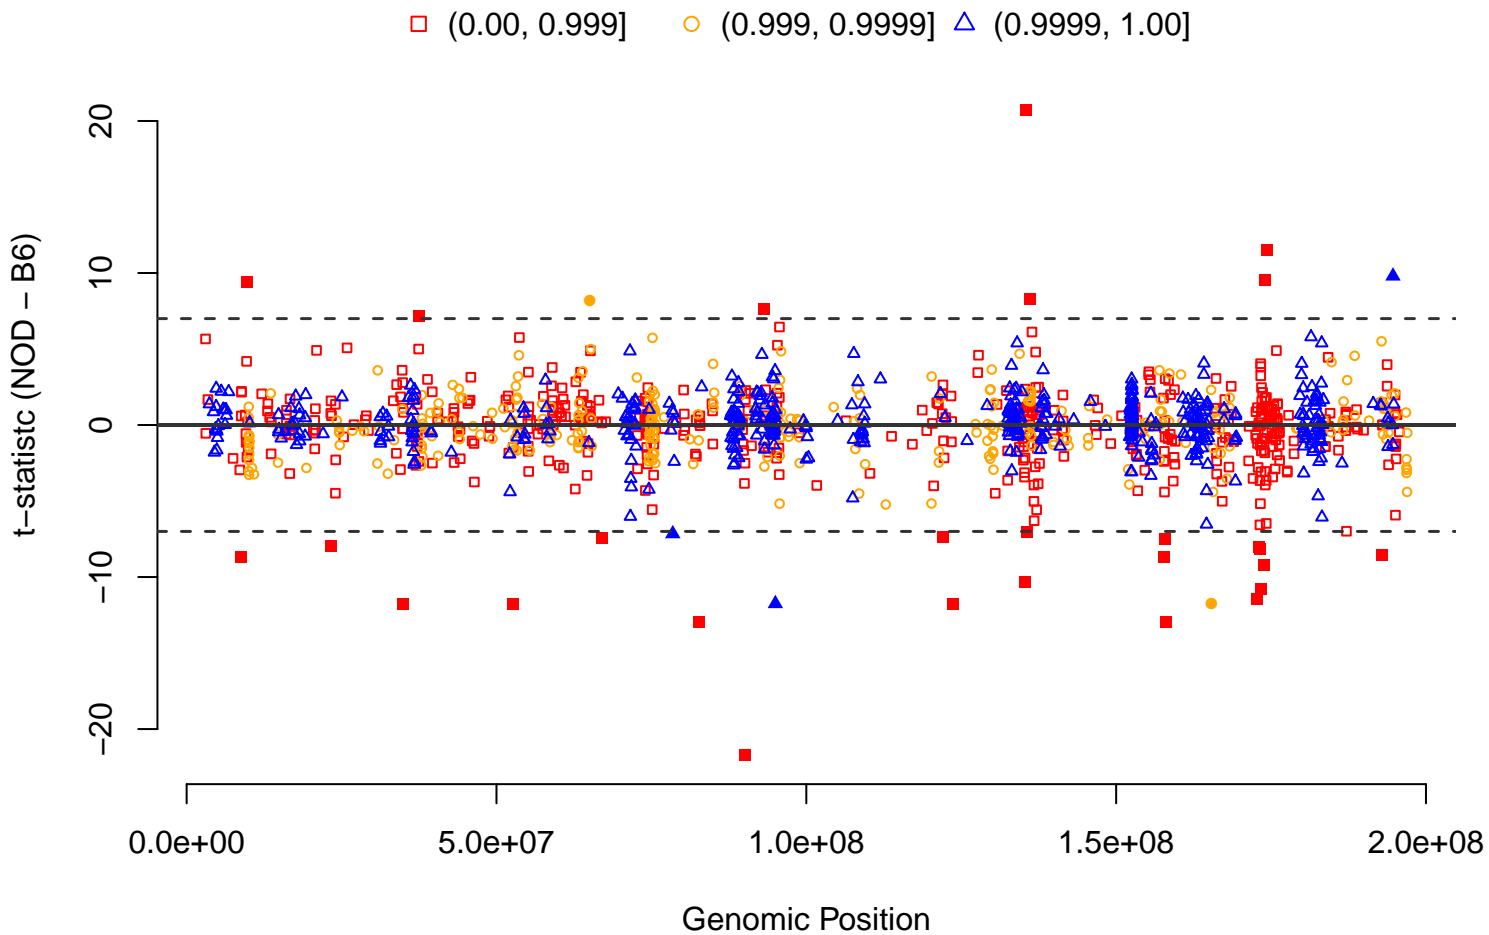

2

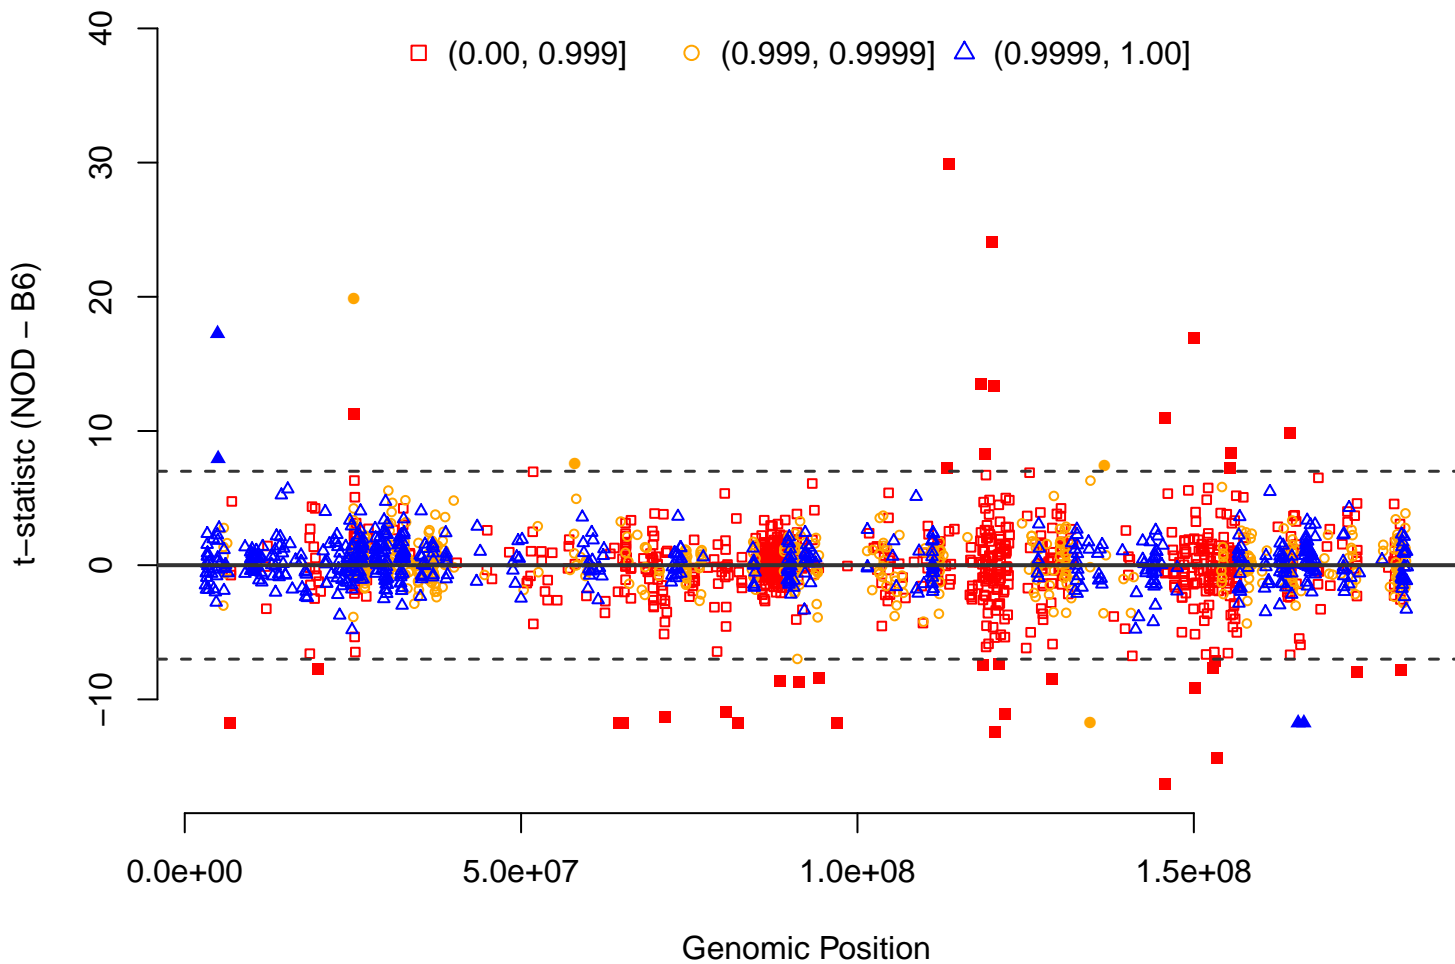

### 3

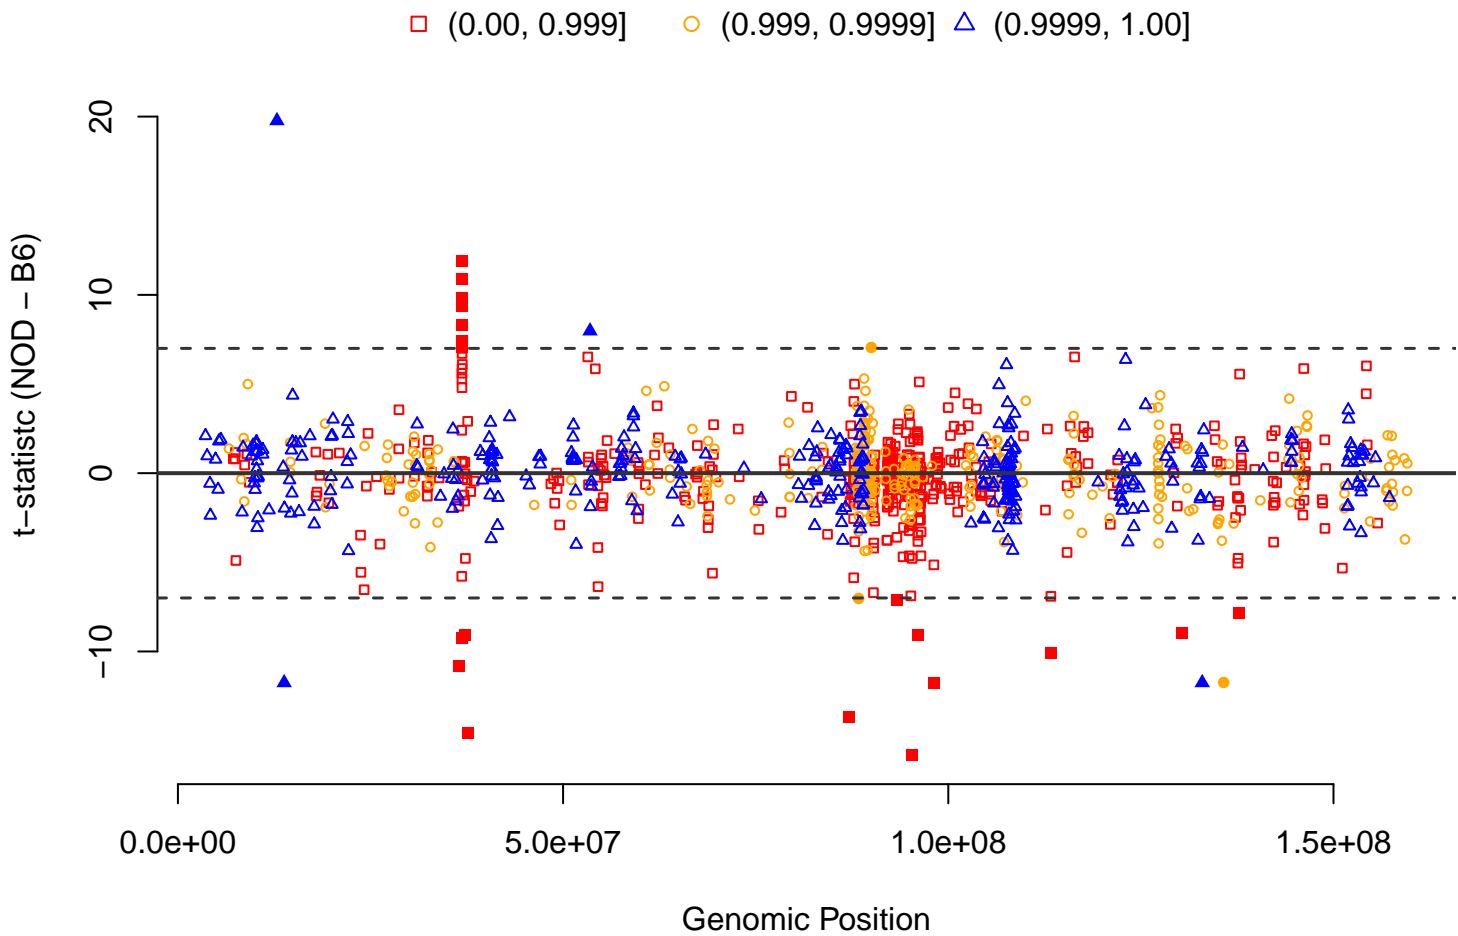

4

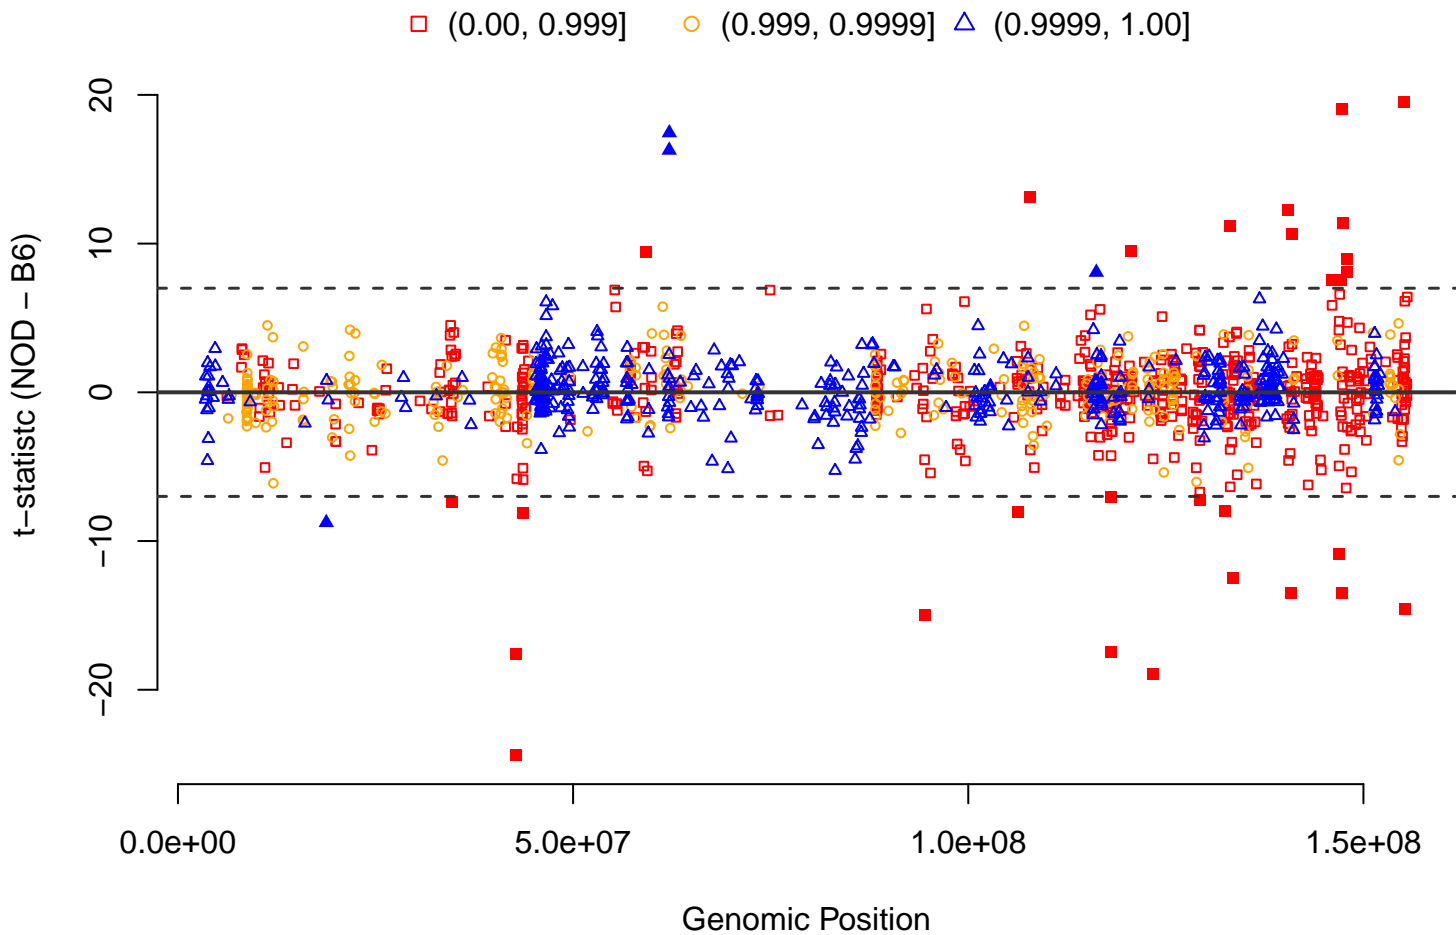

5

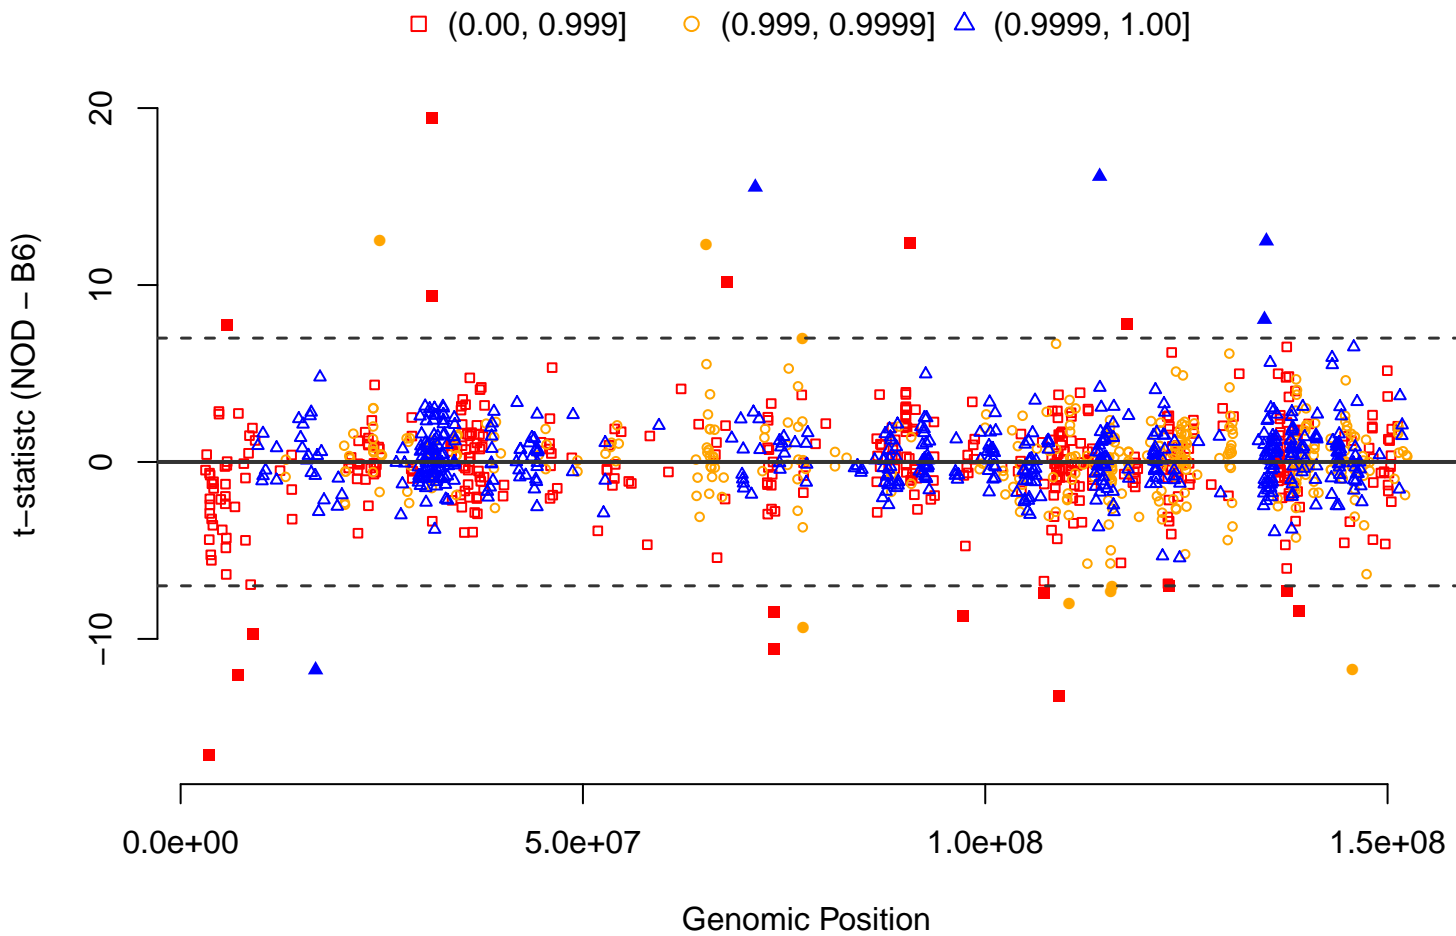

# 6

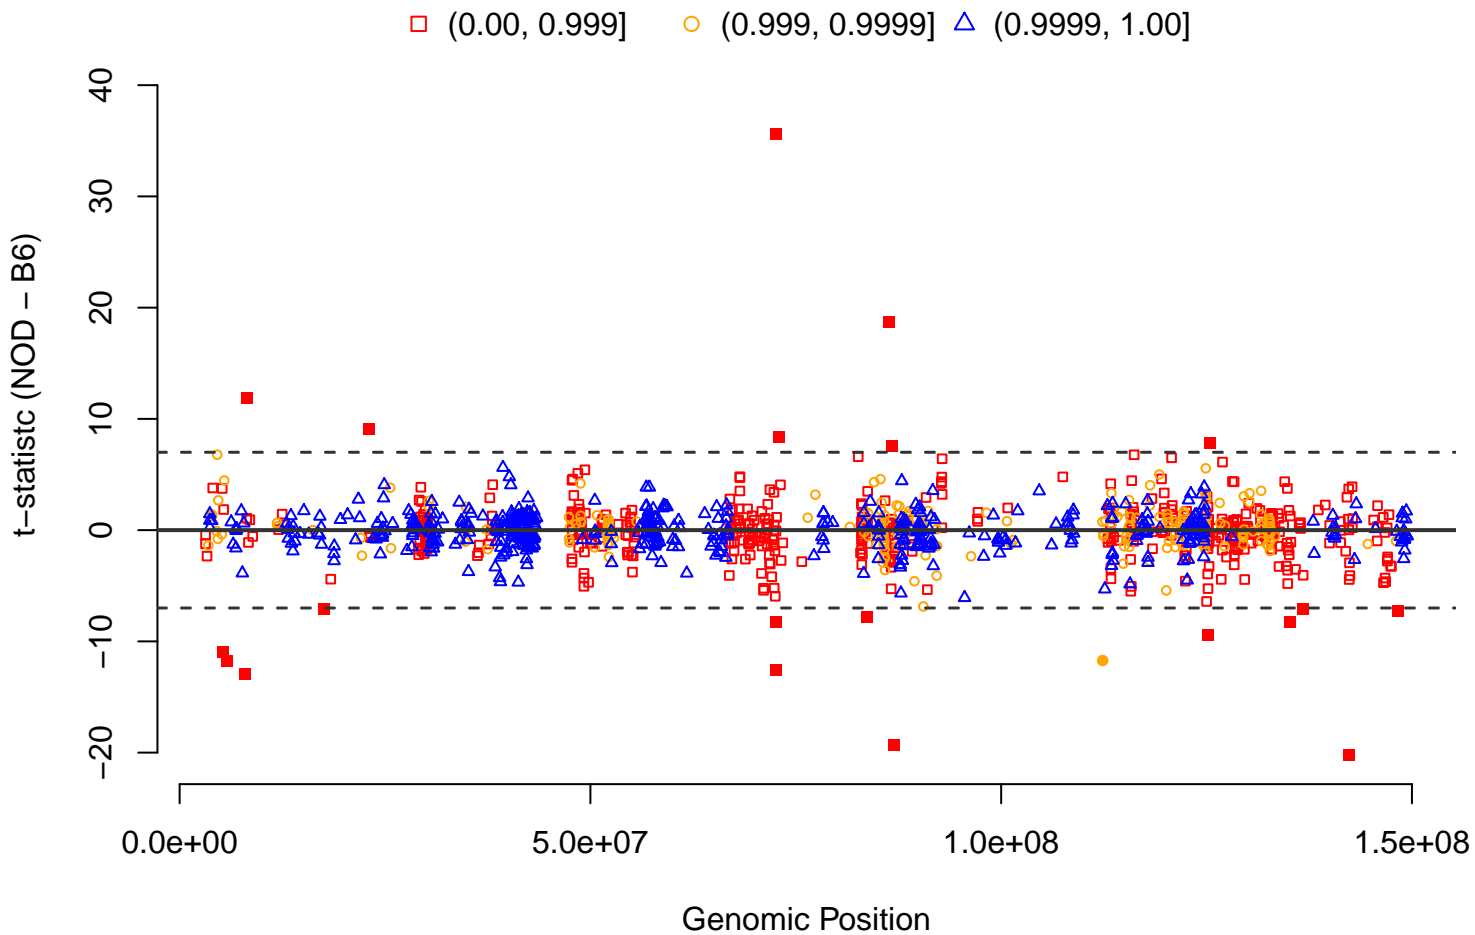

7

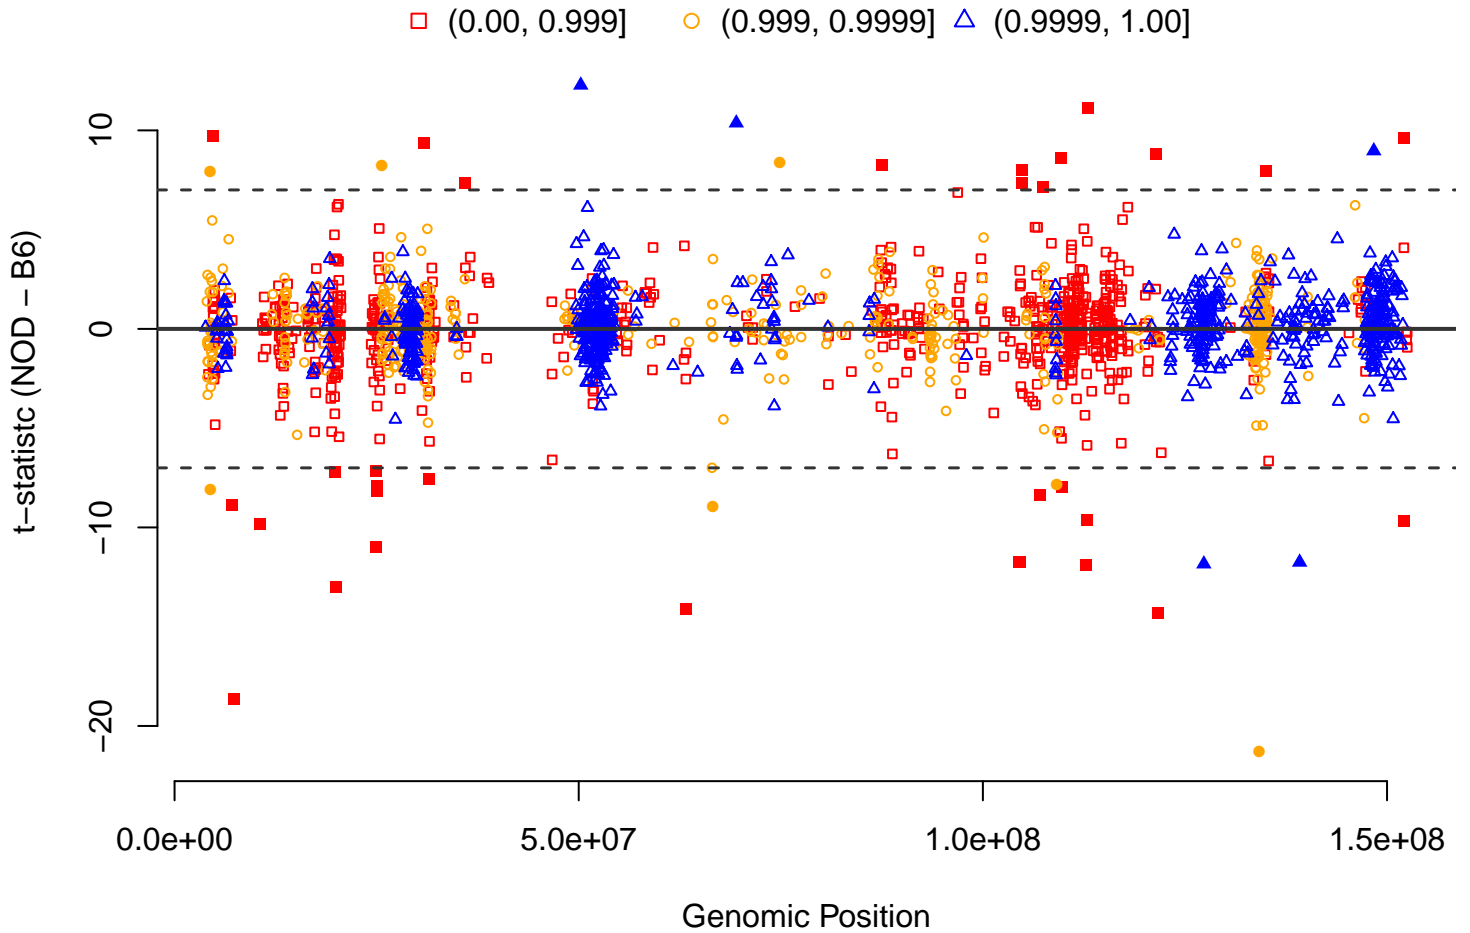

8

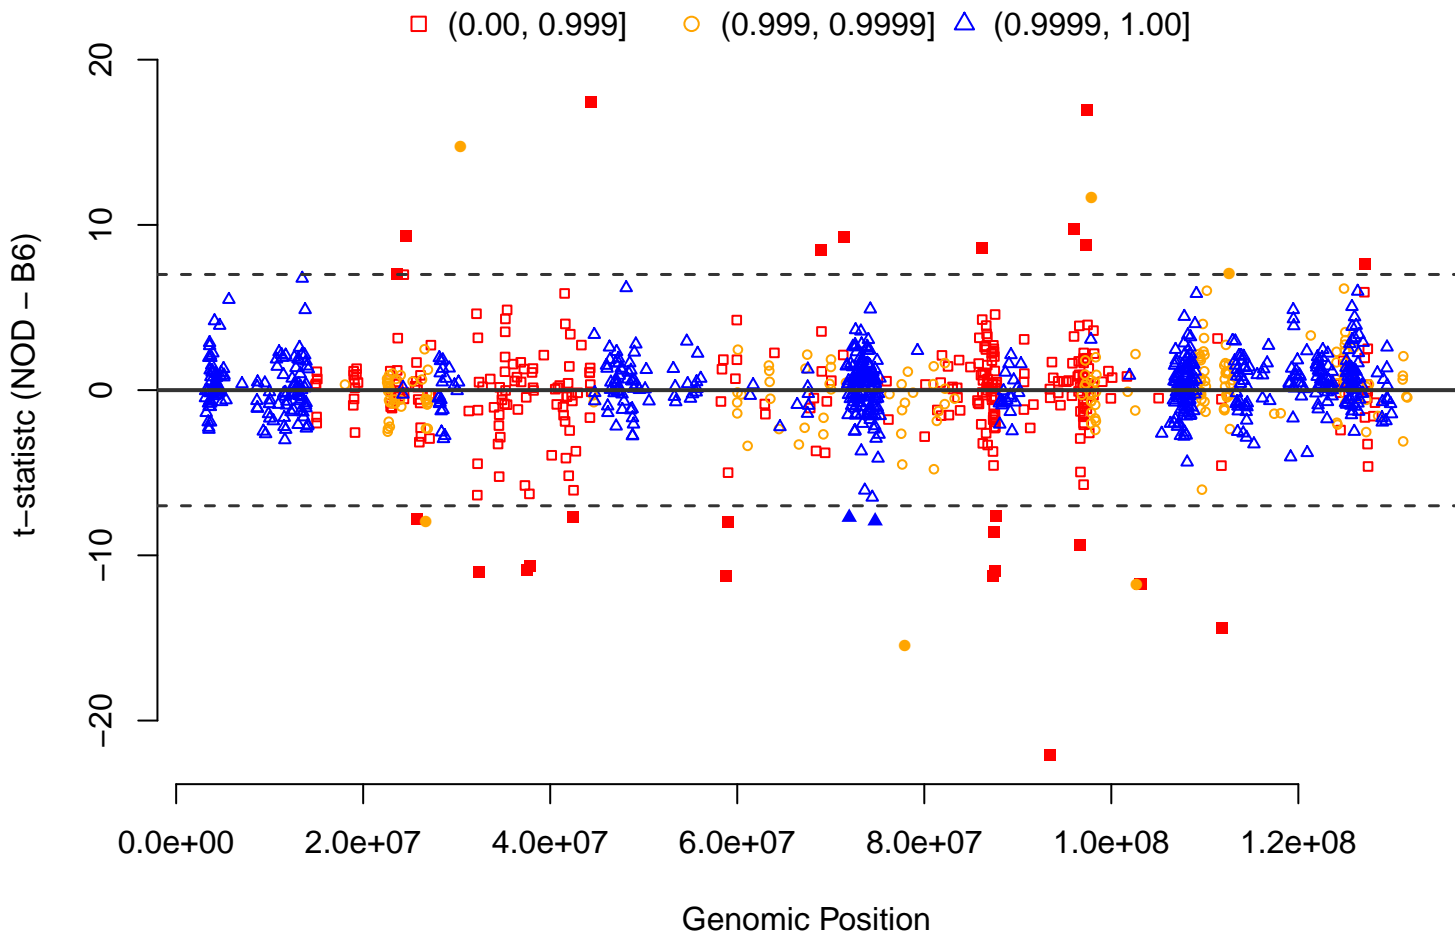



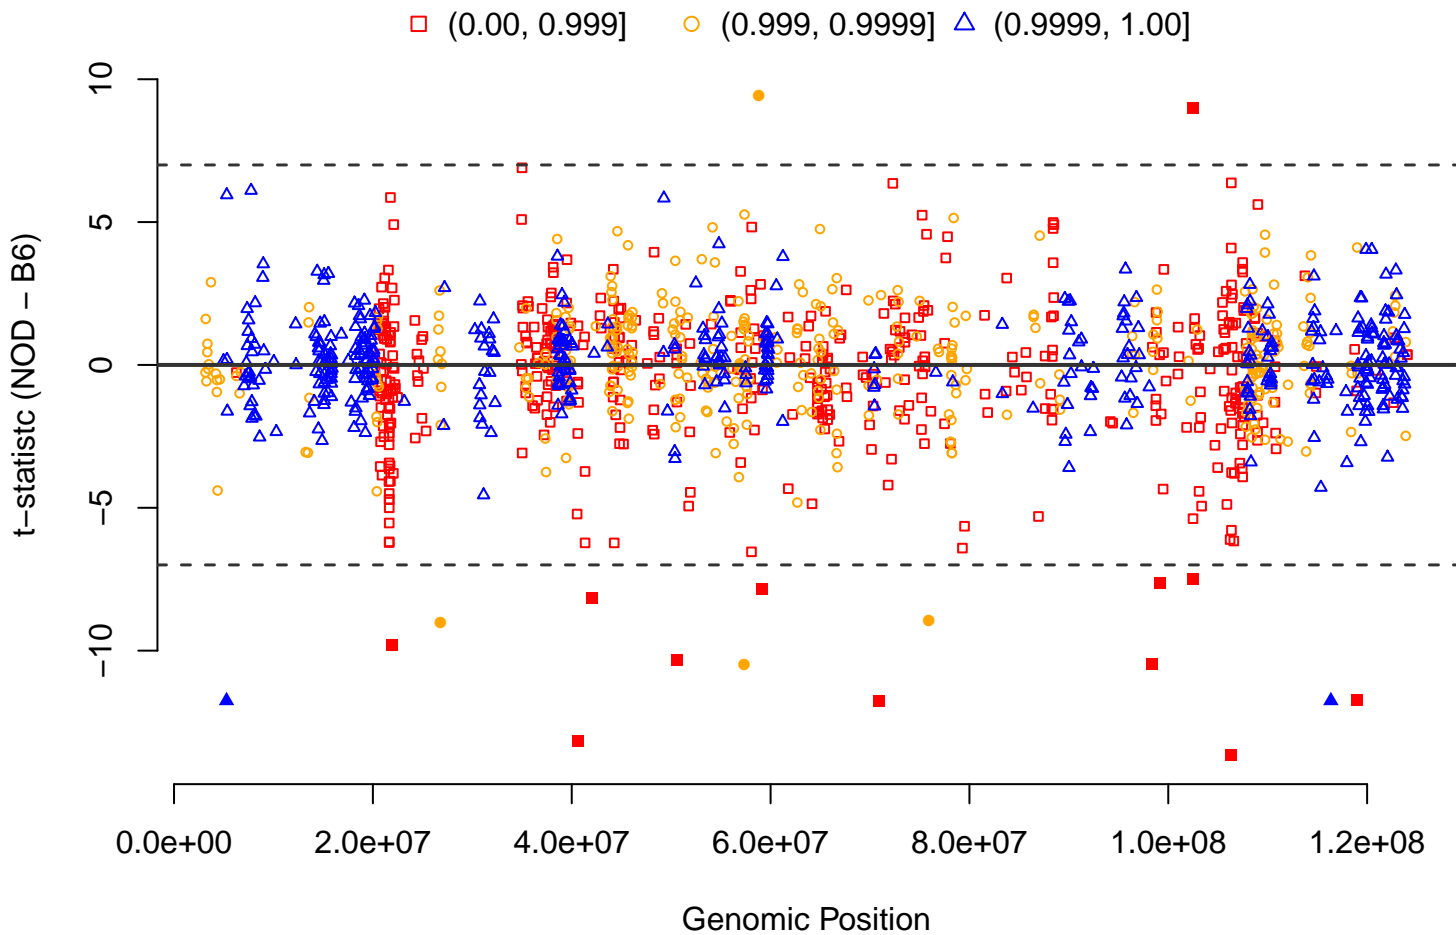

10

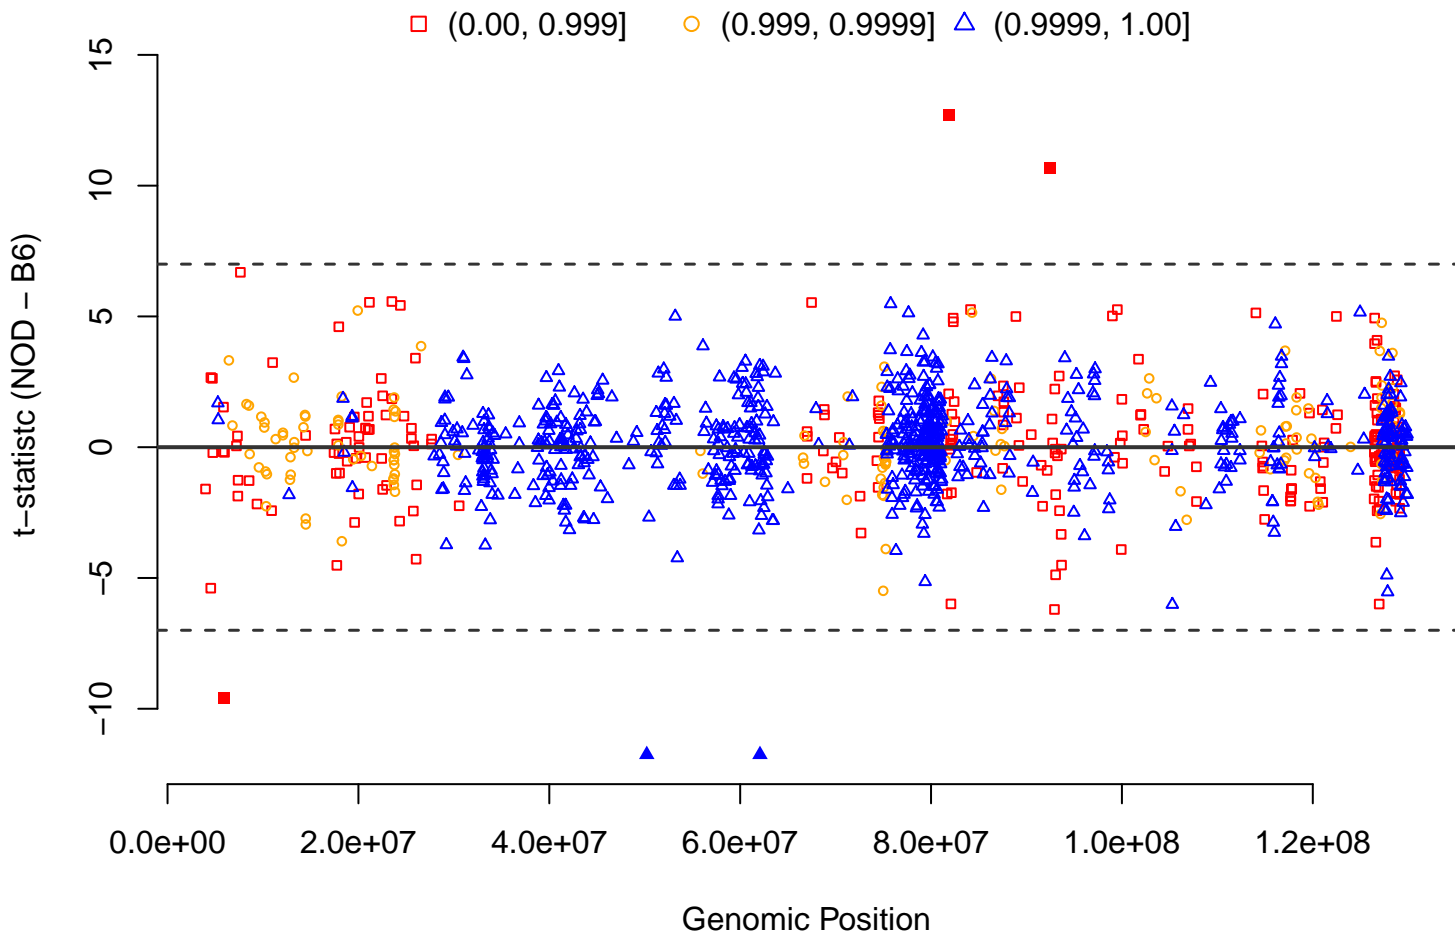

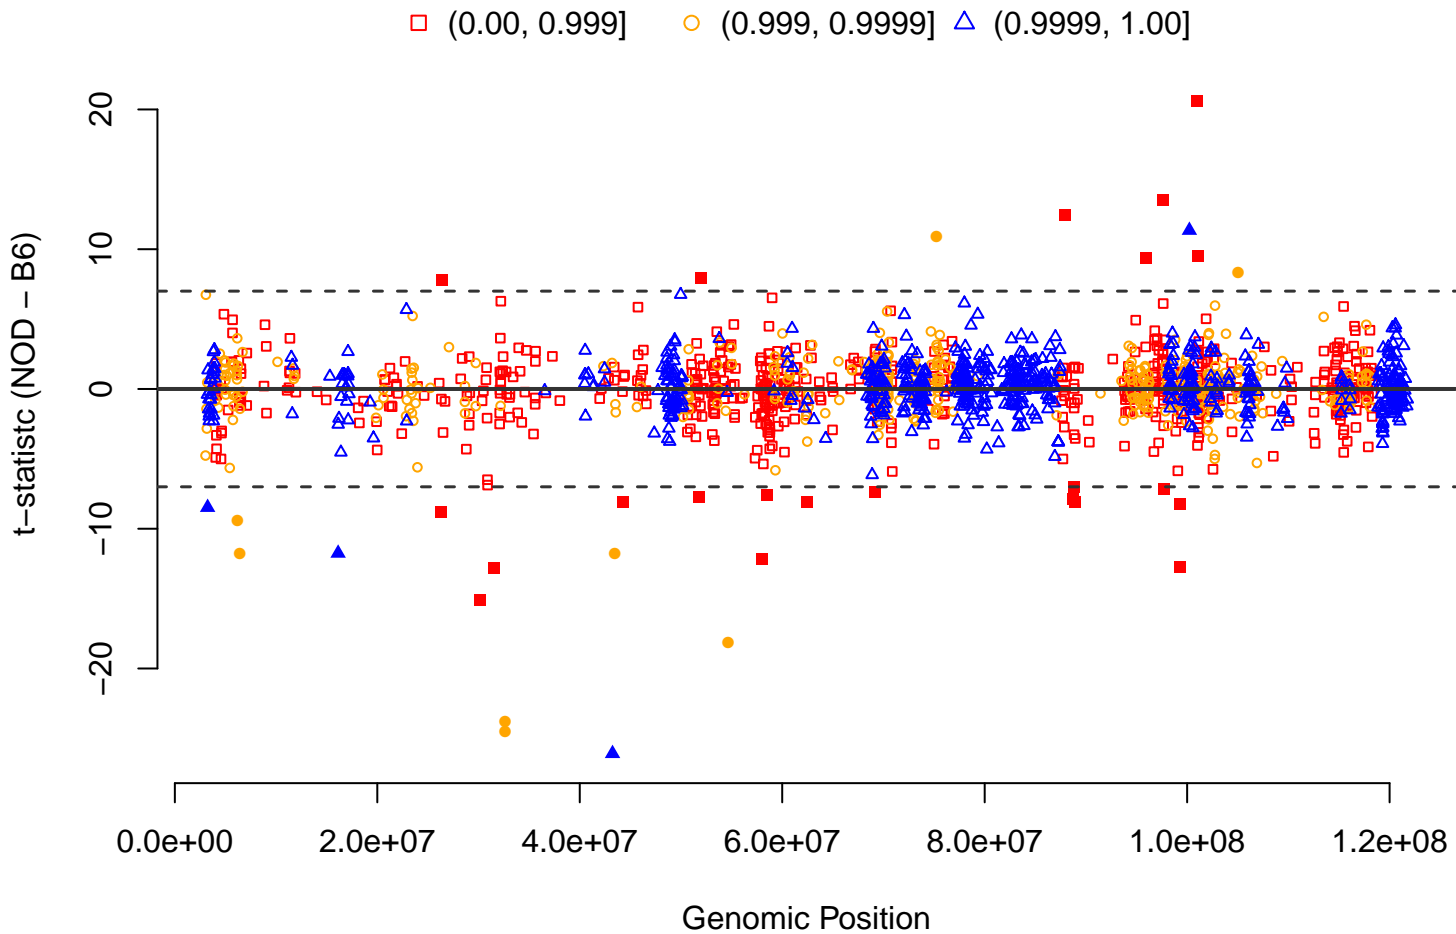

12

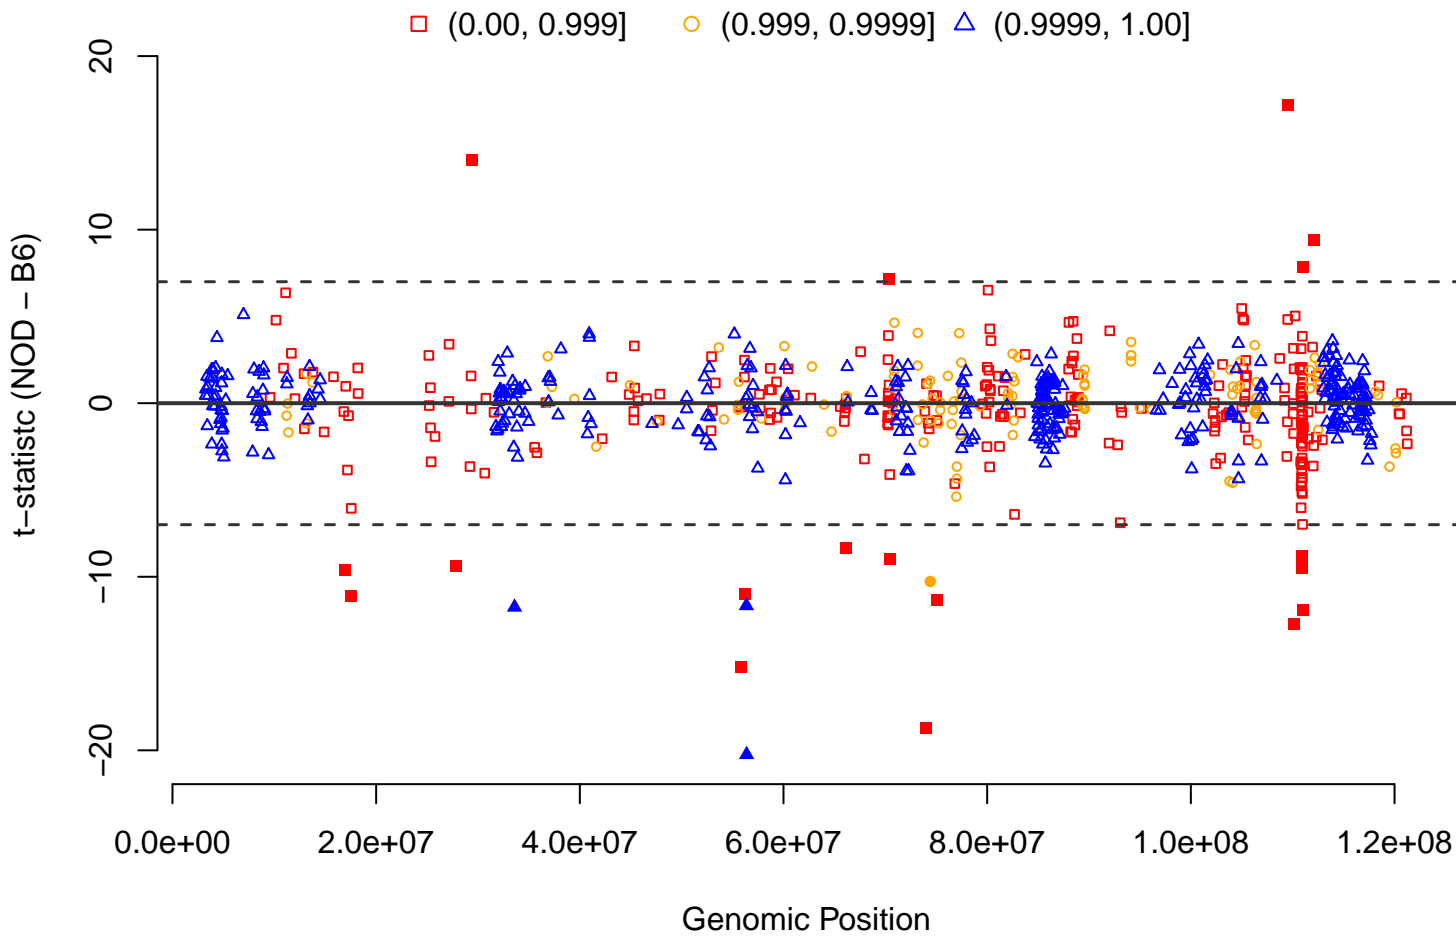

13

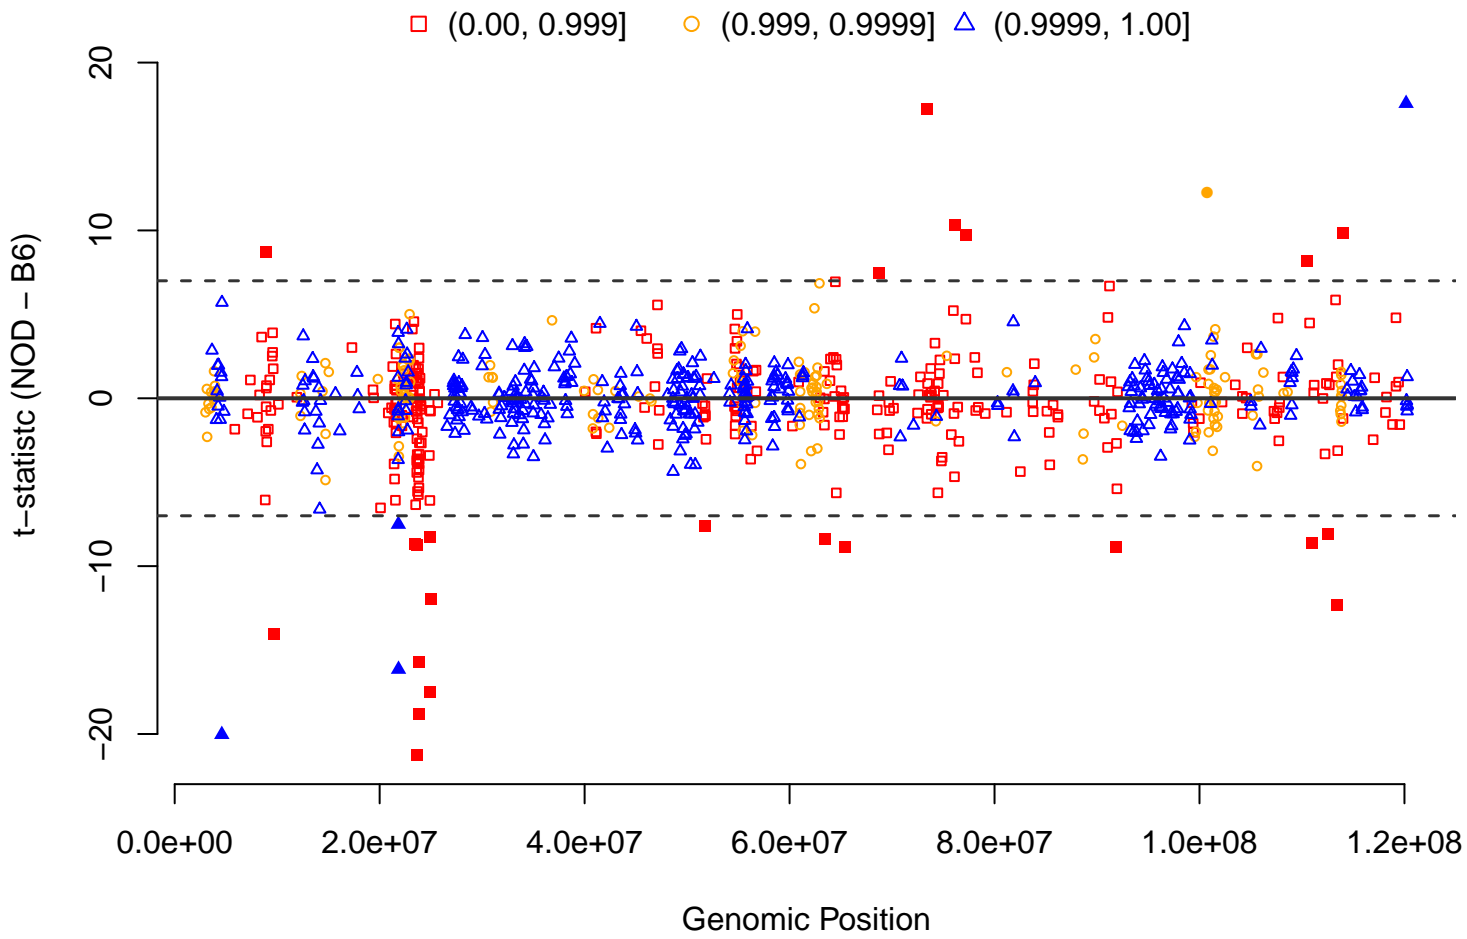

14

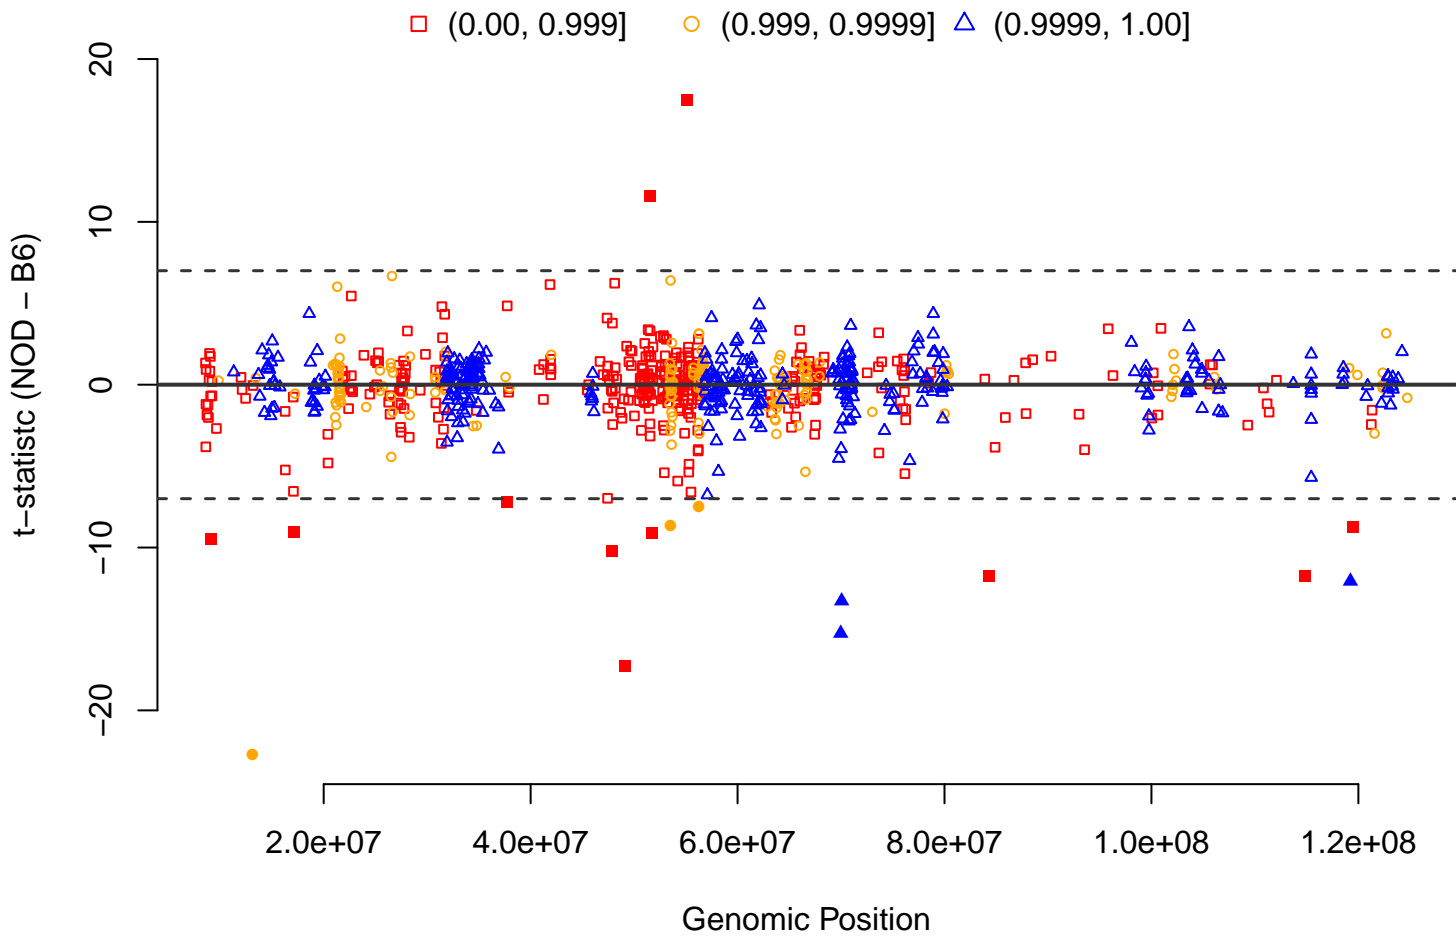

15

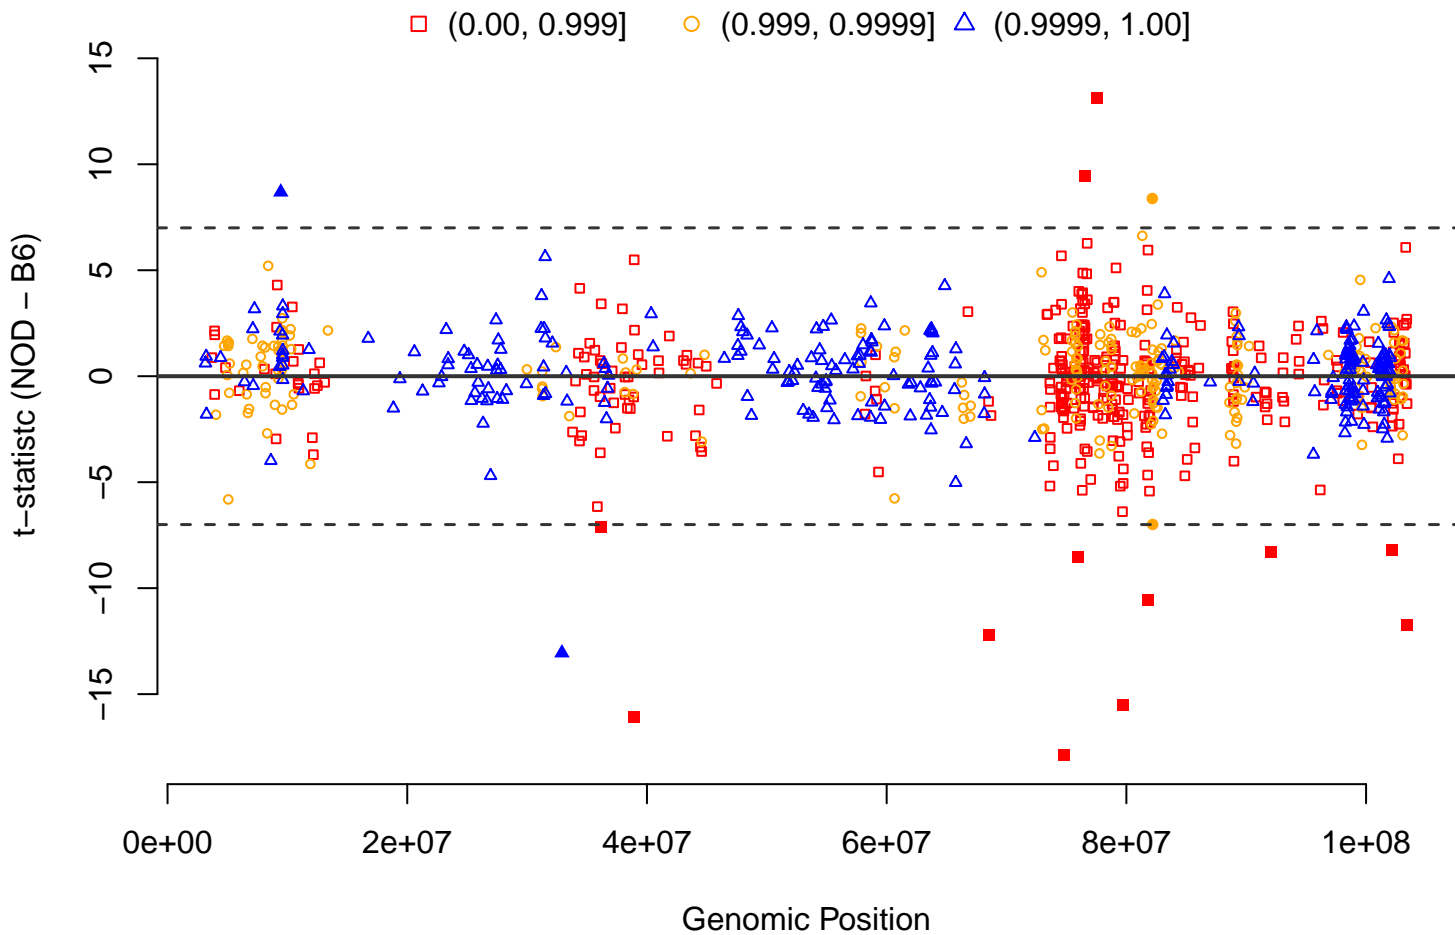

16

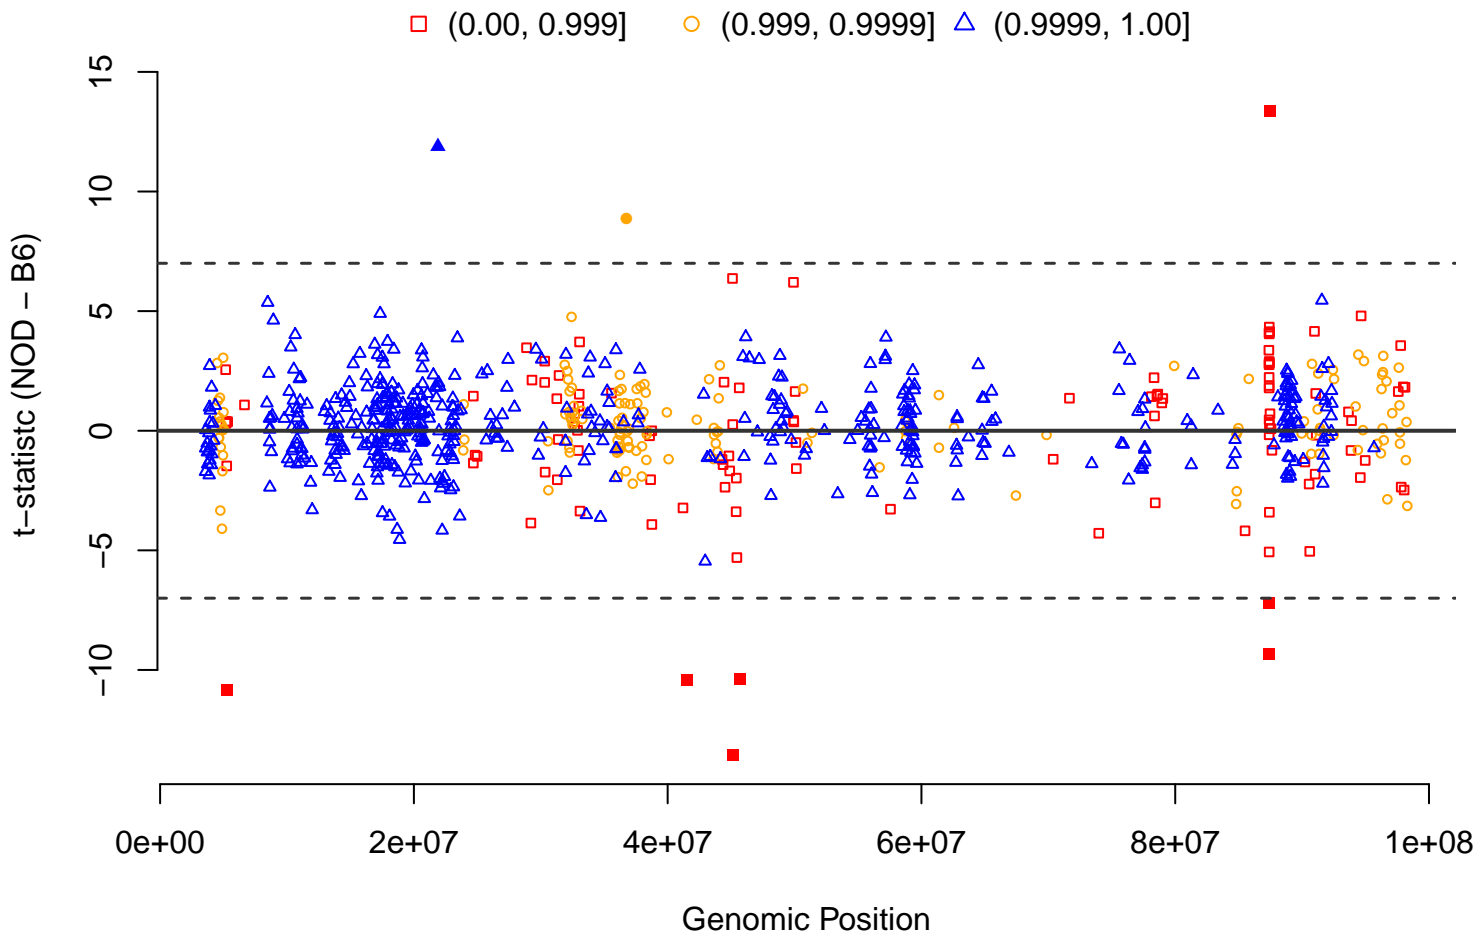



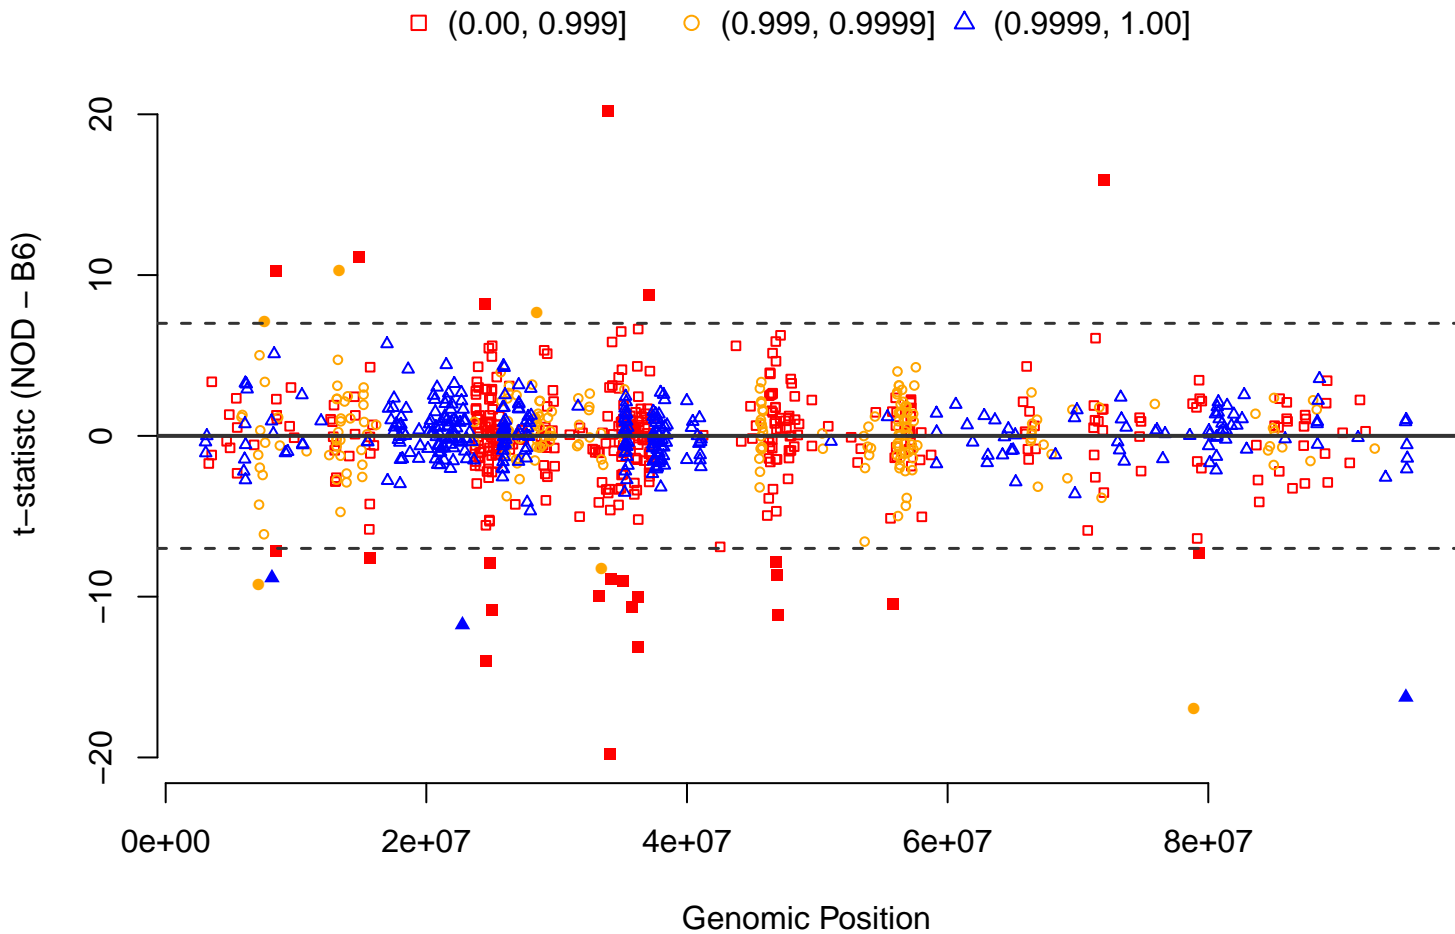

18

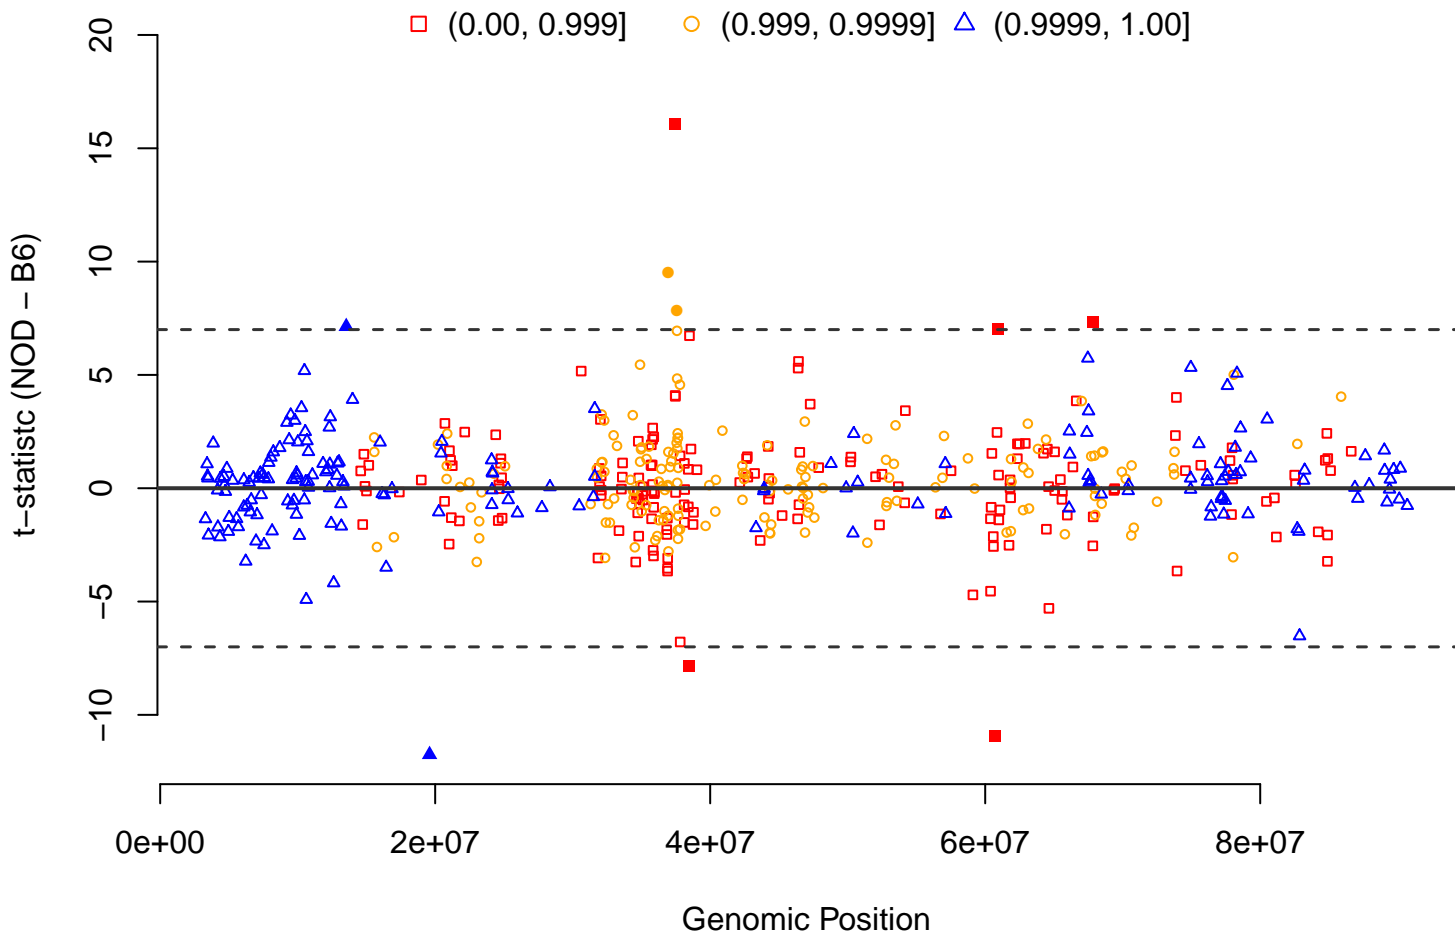

19

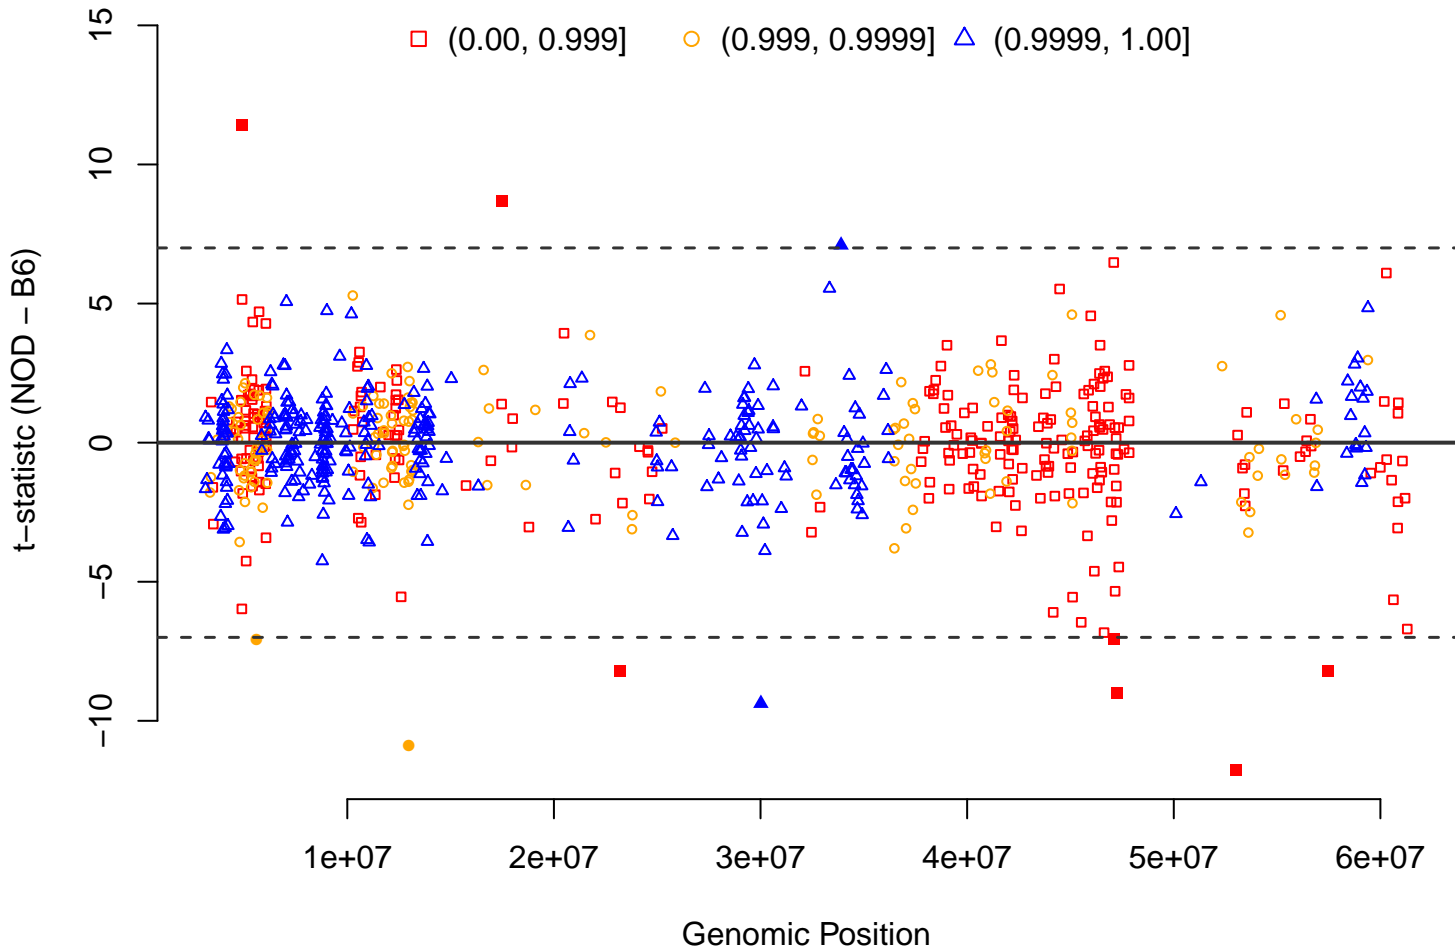

X

□ (0.00, 0.999]    ○ (0.999, 0.9999]    △ (0.9999, 1.00]

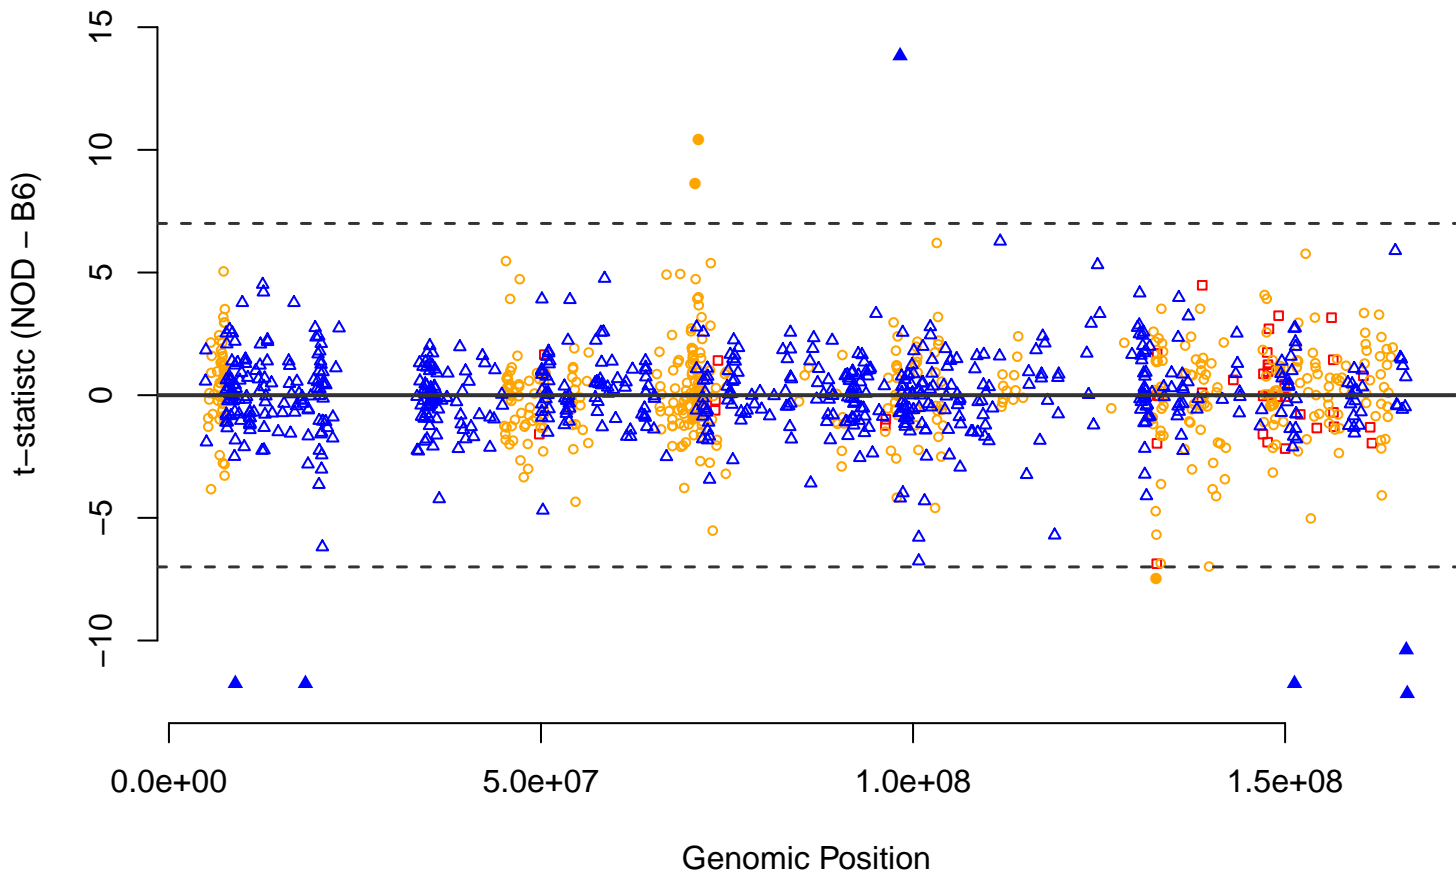

Supplement: 203_figures13.pdf [file 203_figures13.pdf]
