# Supplementary material for: Transcriptome Atlases of Mouse Brain Reveals Differential Expression Across Brain Regions and Genetic Backgrounds
Source: Oxford University Press journal article supplement (doi:10.1534/g3.111.001602), 2012-02-01
Supplement: 203_001602si.pdf [file 203_001602si.pdf]

# Cerebellum Dissection

Important Note: The following dissections are performed using the aid of a dissecting microscope, and on filter paper moistened with cold RNase-free 1X PBS, on top of a petri dish filled with ice. All surgical instruments are cleaned with RNaseZap in between each animal and brain region.

## Method:

Cut one side at the cerebellar peduncle (fig.1, black line) with surgical scissors, or by pinching with forceps.

Note: Inferior colliculi have been removed for better visualization of the peduncles. Removing the inferior colliculi is not necessary for the cerebellum dissection.

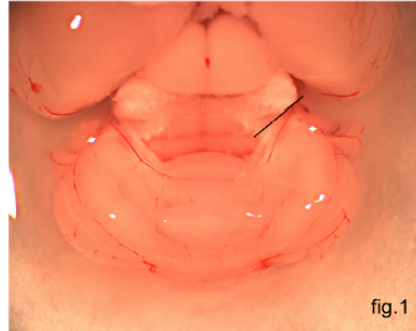

Gently push cerebellum to the side (fig.2).

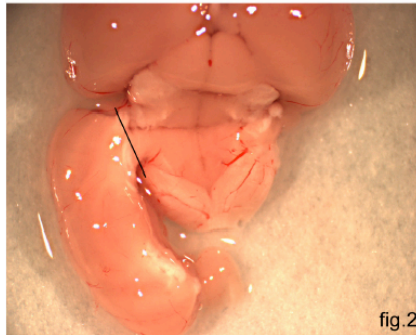

Snip the other cerebellar peduncle (fig.2, black line) to remove the cerebellum (cerebellum is shown removed in fig.3). Immediately place tissue in the bottom of a 15ml Falcon tube, and immediately snap freeze on dry ice.

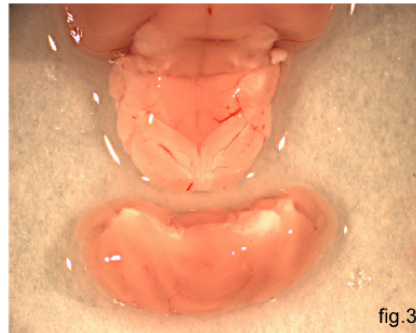

**Figure S1** Removal of cerebellum.

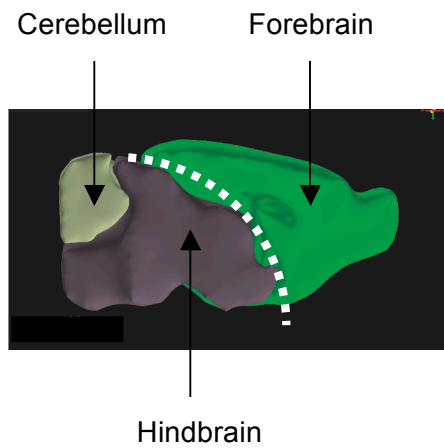

**Figure S2** Separation of forebrain from hindbrain. One end of fine, curved forceps was wedged into the natural division between forebrain and hindbrain (dashed white line). The forceps were then closed, which acted to scoop out the hindbrain while leaving the underlying cortex intact.

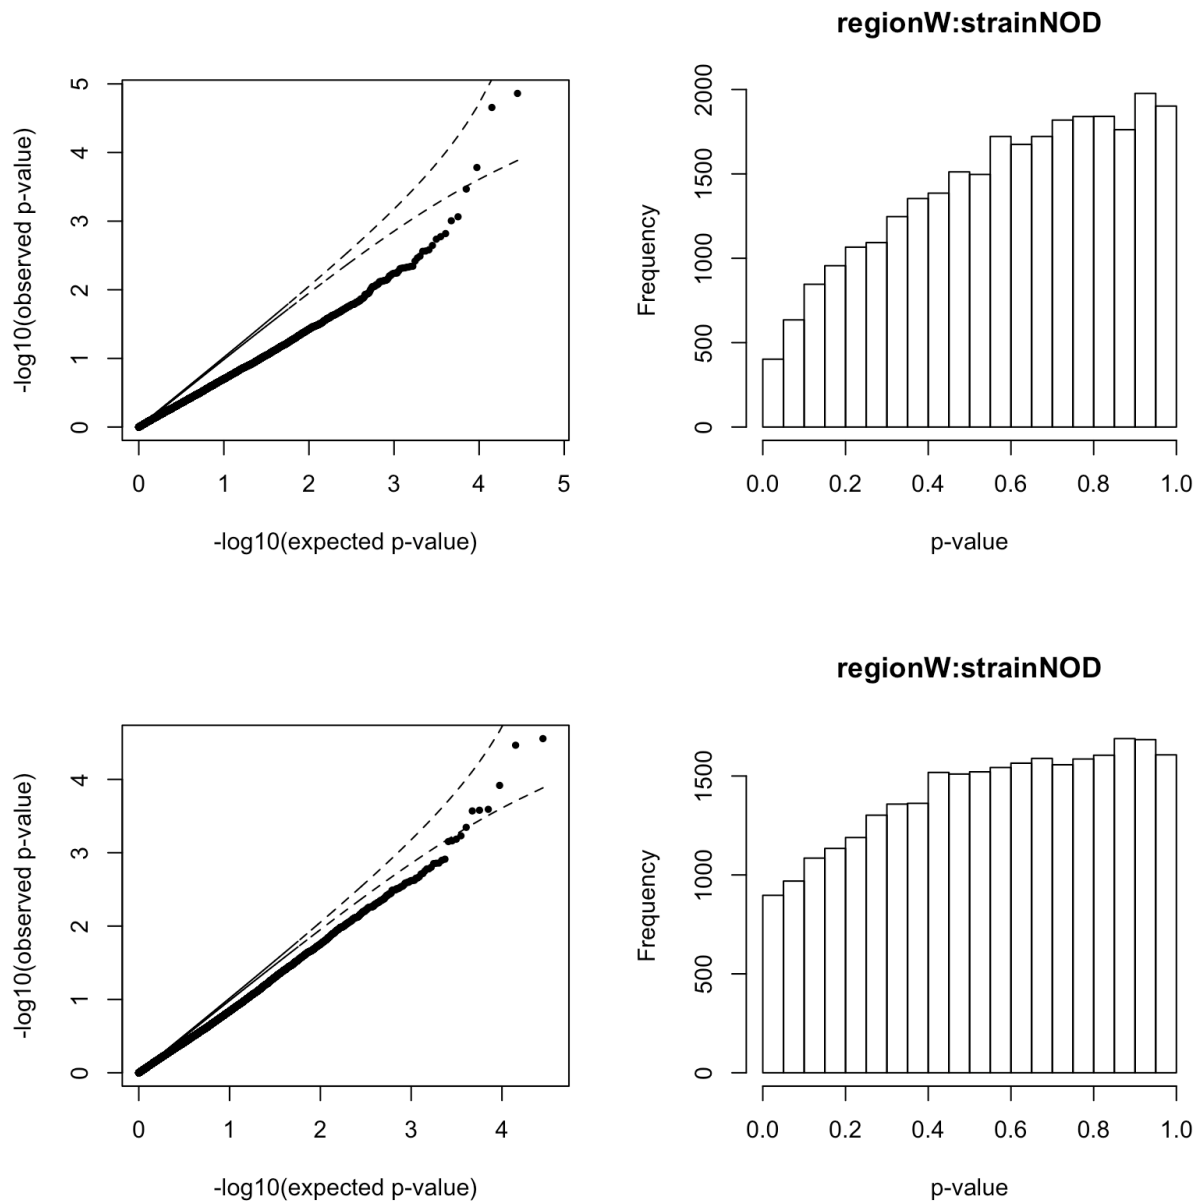

**Figure S3** Conservative p-values from the initial analysis. In the initial analysis, we ran a linear mixed effect model for each gene. These figures illustrate a conservative p-value distribution for the interaction between whole brain region indicator and NOD strain indicator for 1.0ST cartridge array (upper panel) and 1.1ST GeneTitan array (lower panel). The left panel shows the QQ-plot of the p-values for the 35,556 genes. The broken lines indicate 95% confidence intervals if p-values follow a uniform distribution. The right panel is the histogram of the p-values. These figures clearly demonstrate conservative patterns, which imply the effects of unaccounted confounding variables.

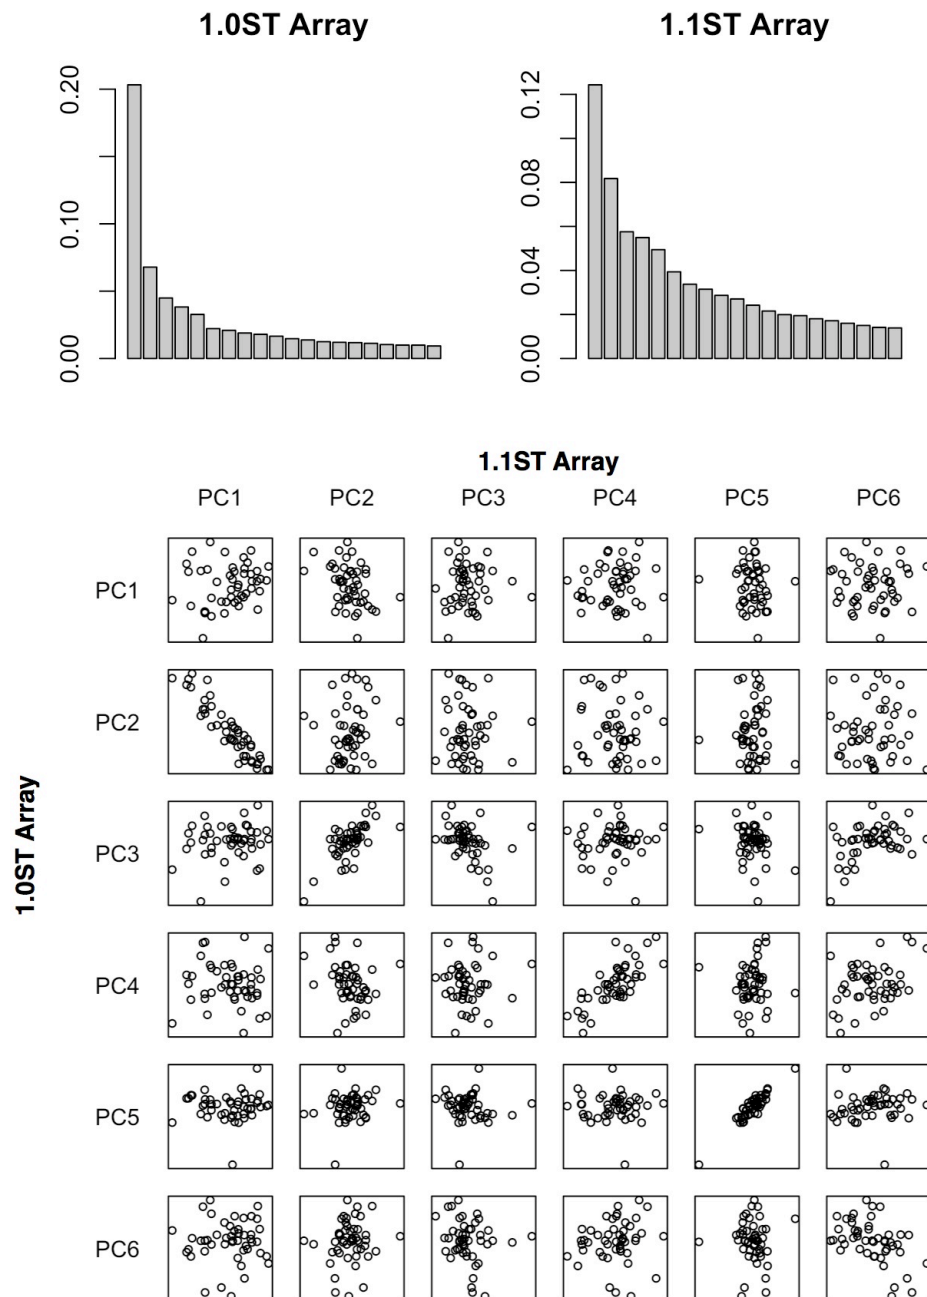

Figure S4 **Surrogate Variable Analysis.** (a) The first 20 eigenvalues of the residuals from linear mixed effect model specified in equation (1) in main text Methods section for 1.0ST cartridge data. (b) The first 20 eigenvalues of the residuals of 1.1ST GeneTitan data. (c) Scatter plots of PC1-5 from expression data of the two platforms. GeneTitan PC1 is correlated with cartridge PC2, and PC3 and PC4 of the two platforms are correlated. We chose the first four PCs as surrogate variables since they either have large eigenvalues or are correlated with other PCs in the other platform.

(a) Eigenvalues and projection plots for the first three PCs.

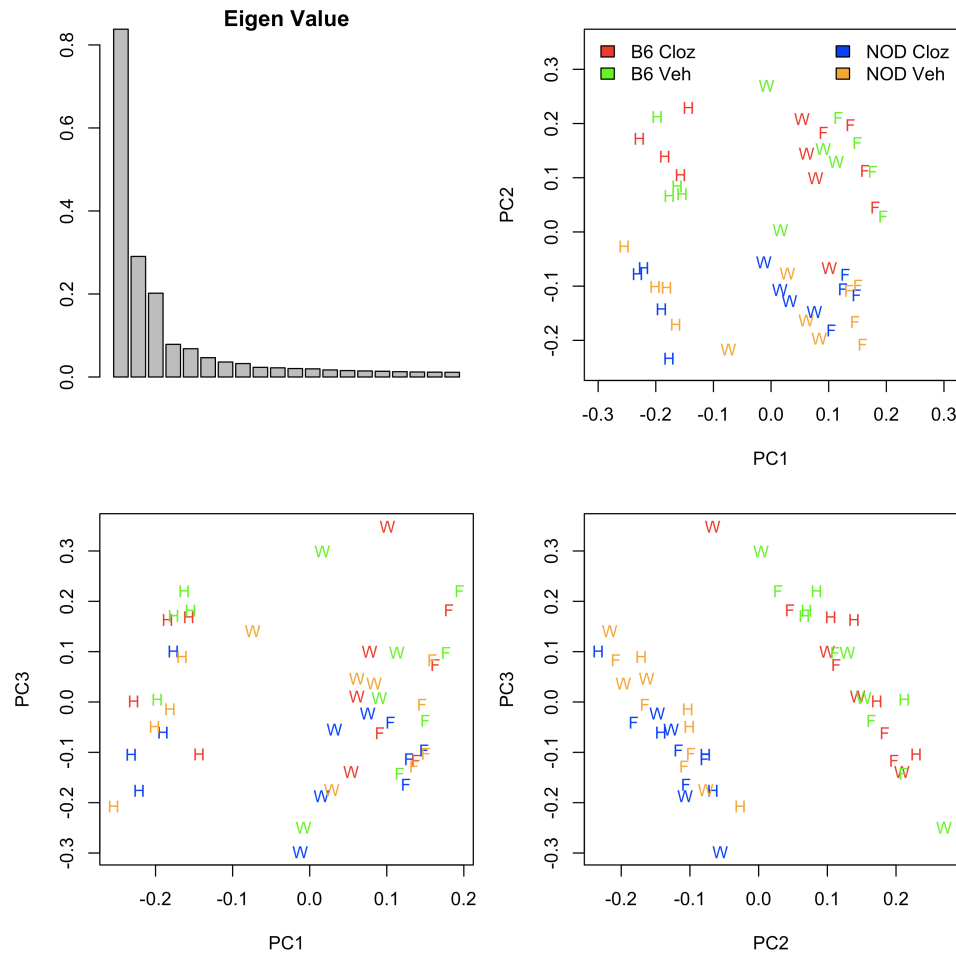

(B) R2 between the five covariates and the first 9 PCs. The covariate left/right indicate the sample is from left or right hemispheres.

|            |      |      |      |      |      |      |      |      |      |
|------------|------|------|------|------|------|------|------|------|------|
| left/right | 0    | 0    | 0    | 0.01 | 0.05 | 0    | 0.02 | 0    | 0.02 |
| drug       | 0    | 0    | 0.03 | 0.11 | 0    | 0.12 | 0.12 | 0.18 | 0.01 |
| strain     | 0.01 | 0.79 | 0.19 | 0.01 | 0    | 0    | 0    | 0    | 0    |
| region     | 0.94 | 0    | 0.02 | 0.04 | 0.07 | 0.01 | 0.39 | 0.02 | 0.01 |
| day        | 0.04 | 0.06 | 0.02 | 0    | 0.42 | 0    | 0.02 | 0.01 | 0.03 |
|            | PC1  | PC2  | PC3  | PC4  | PC5  | PC6  | PC7  | PC8  | PC9  |

**Figure S5** PCA for gene expression from 1.0ST cartridge arrays.

(a) Eigenvalues and projection plots for the first three PCs.

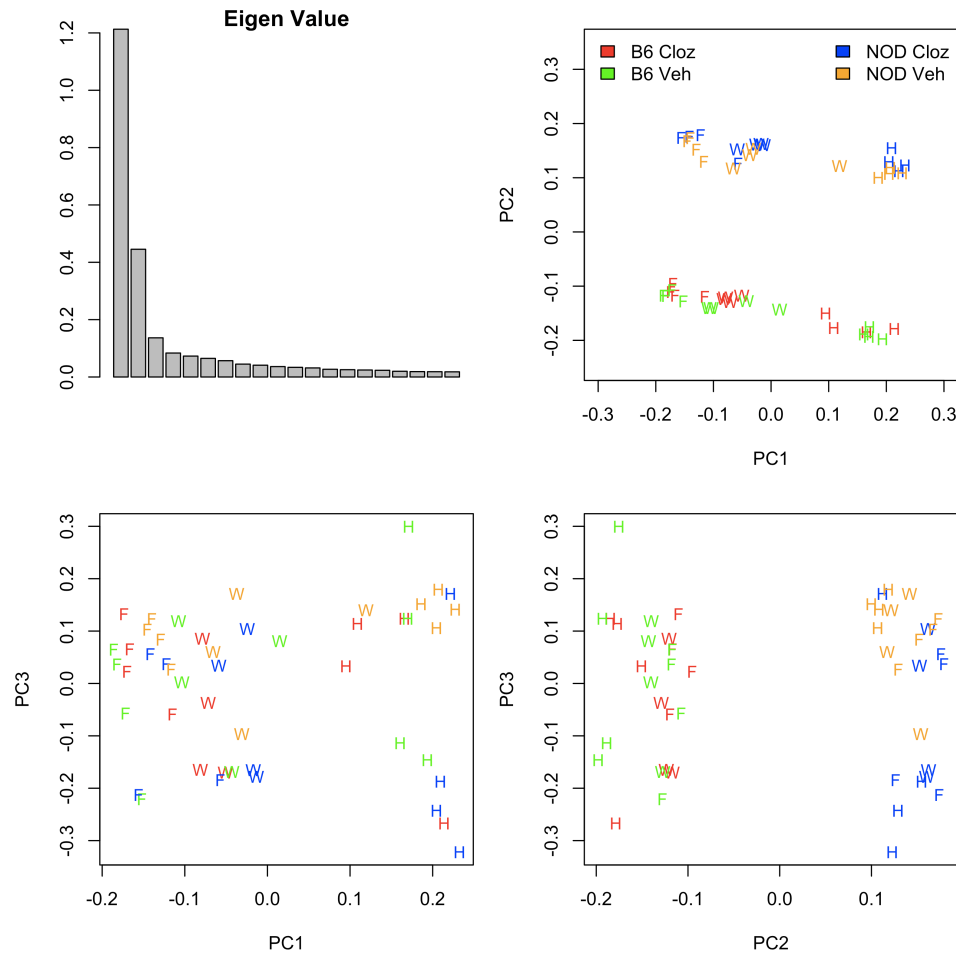

(b) R2 between the five covariates and the first 9 PCs.

|            |      |      |      |      |      |      |      |      |      |
|------------|------|------|------|------|------|------|------|------|------|
| left/right | 0    | 0    | 0.01 | 0    | 0.01 | 0.03 | 0    | 0    | 0.01 |
| drug       | 0    | 0    | 0.12 | 0.02 | 0.06 | 0.09 | 0.22 | 0.08 | 0.01 |
| strain     | 0.03 | 0.96 | 0    | 0    | 0    | 0    | 0    | 0    | 0    |
| region     | 0.92 | 0.02 | 0    | 0.13 | 0.07 | 0.08 | 0.1  | 0.1  | 0.08 |
| day        | 0.03 | 0.04 | 0.01 | 0.13 | 0    | 0.08 | 0.02 | 0.05 | 0    |
|            | PC 1 | PC 2 | PC 3 | PC 4 | PC 5 | PC 6 | PC 7 | PC 8 | PC 9 |

Figure S6 PCA for gene expression from 1.1ST peg arrays.

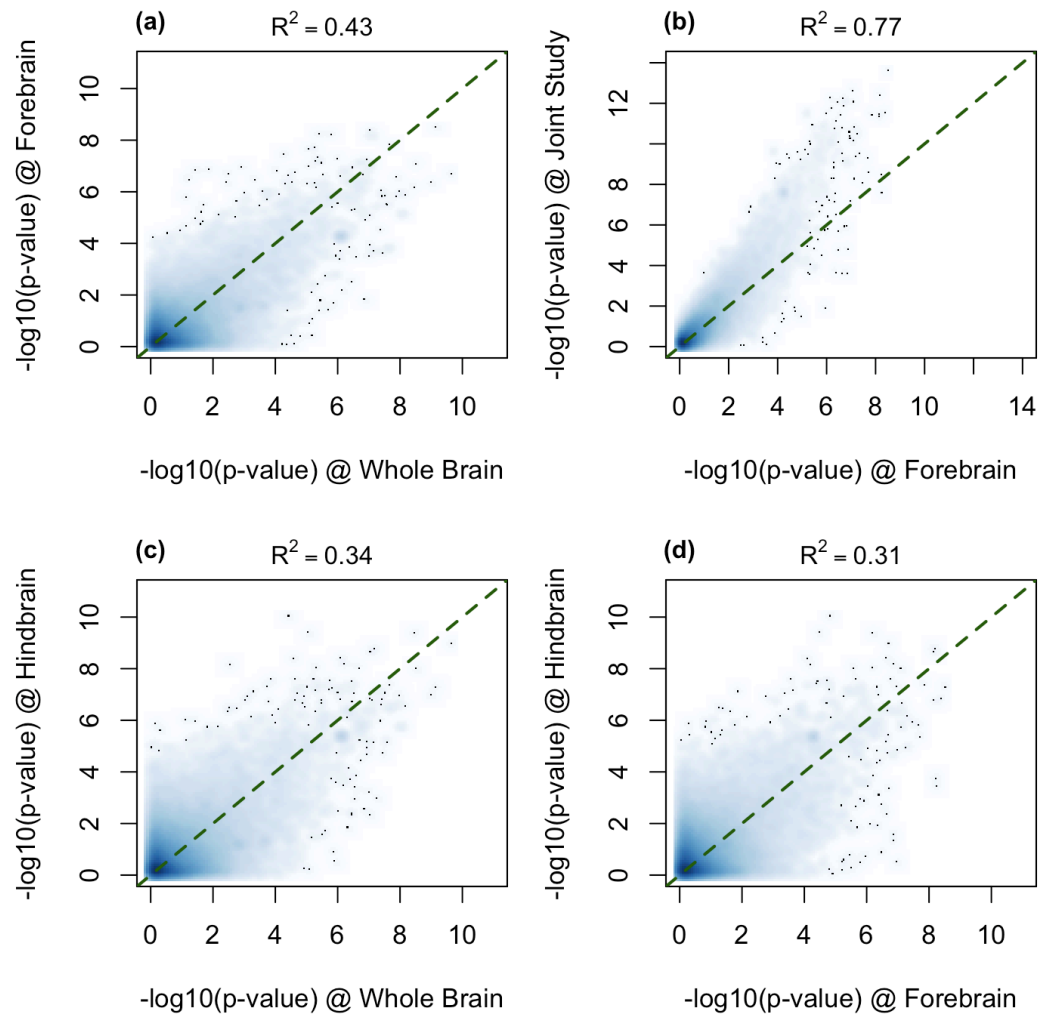

**Figure S7** Comparison of brain-region-specific analysis and joint analysis. Comparison of strain effects assessed in different brain regions (by fixed effect model) or assessed by joint modeling three brain regions using linear mixed effect model. The  $R^2$  is calculated as the correlation square of  $-\log_{10}(\text{p-value})$ .

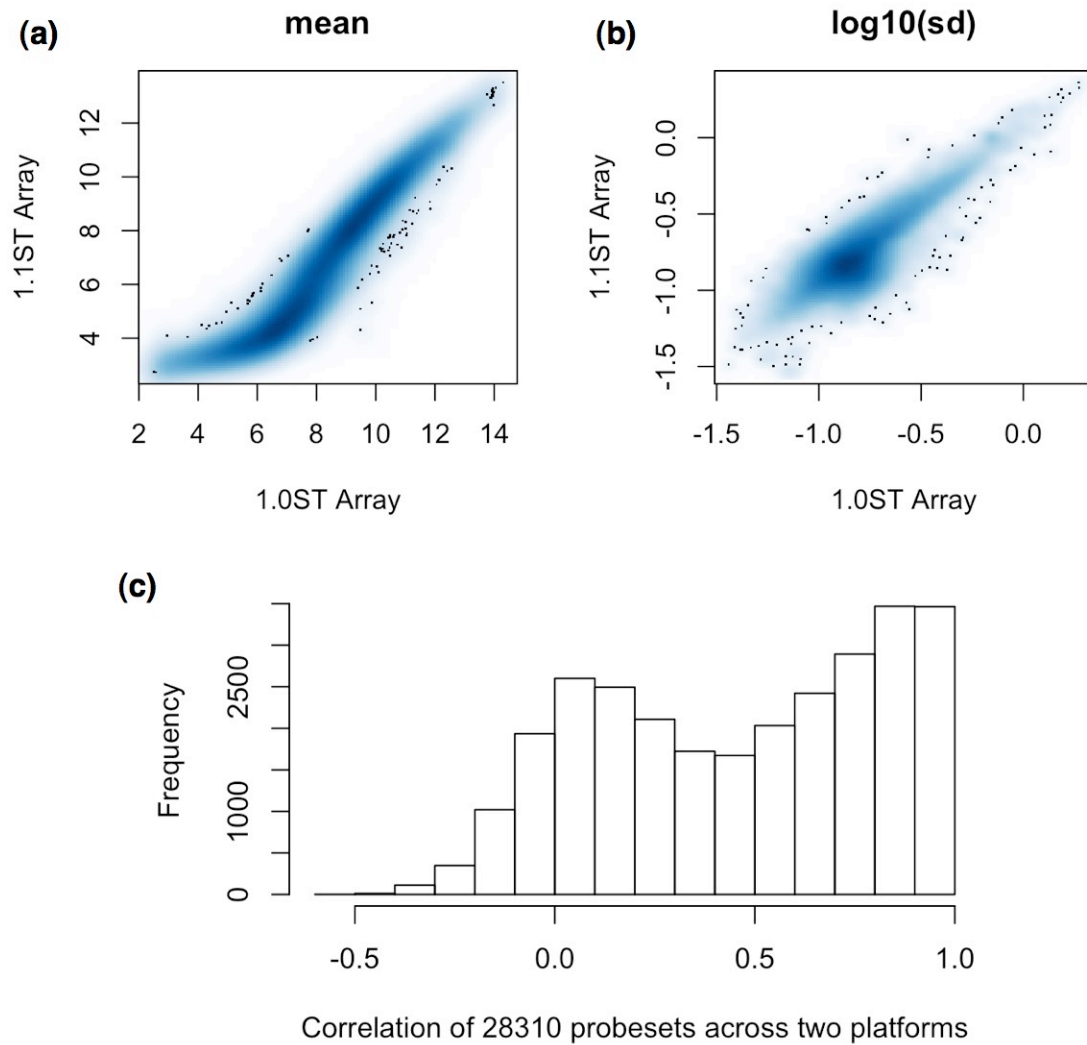

**Figure S8** Comparisons of two platforms (I). (a) Scatter plot of the expression means of the 28,310 transcripts across the two platforms. (b) Scatter plot of the expression standard deviations of the 28,310 transcripts across the two platforms. (c) Histogram of the correlations of transcript expression across the two platforms. The correlation of each transcript is calculated as follows. Since there are 48 samples for each platform, the expression data of one transcript across the two platforms are two vectors of length 48, and the correlations of these two vectors were calculated.



(a) Cross-platform correlations and mean expression level and standard deviations.

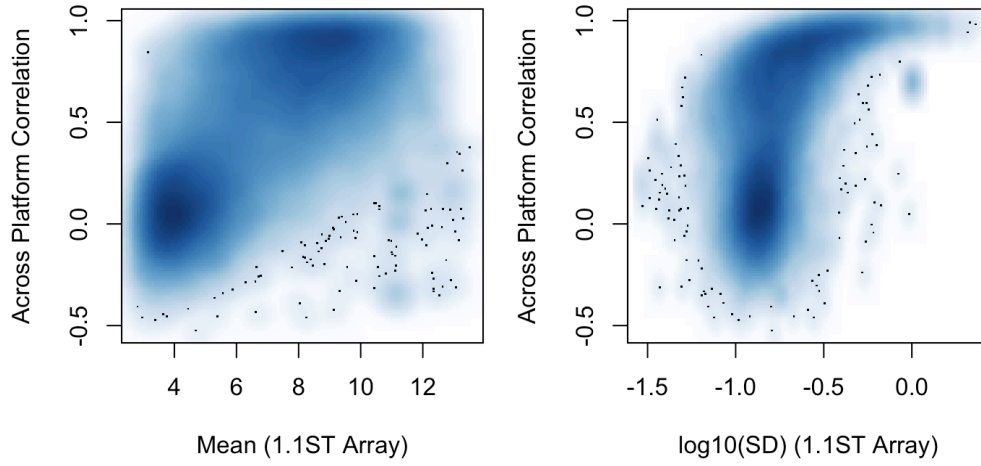

(b) The overlap of the differentially expressed genes across the two platforms.

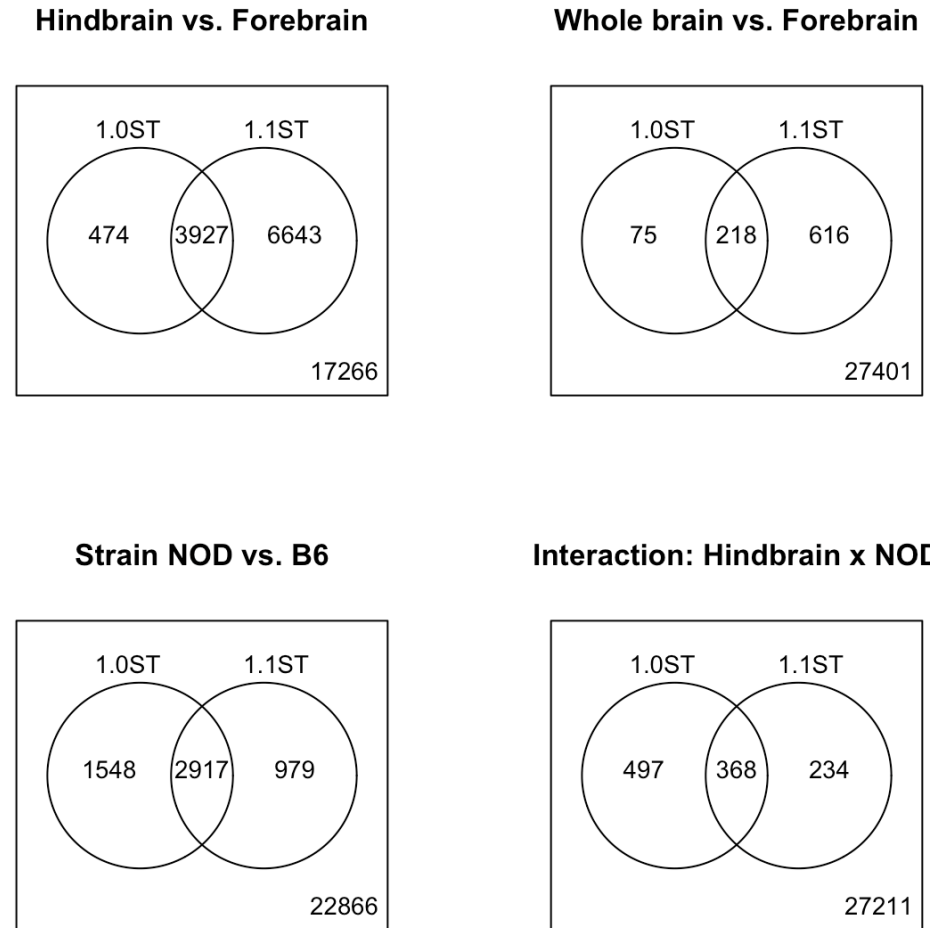

**Figure S9** Comparisons of two platforms (II).

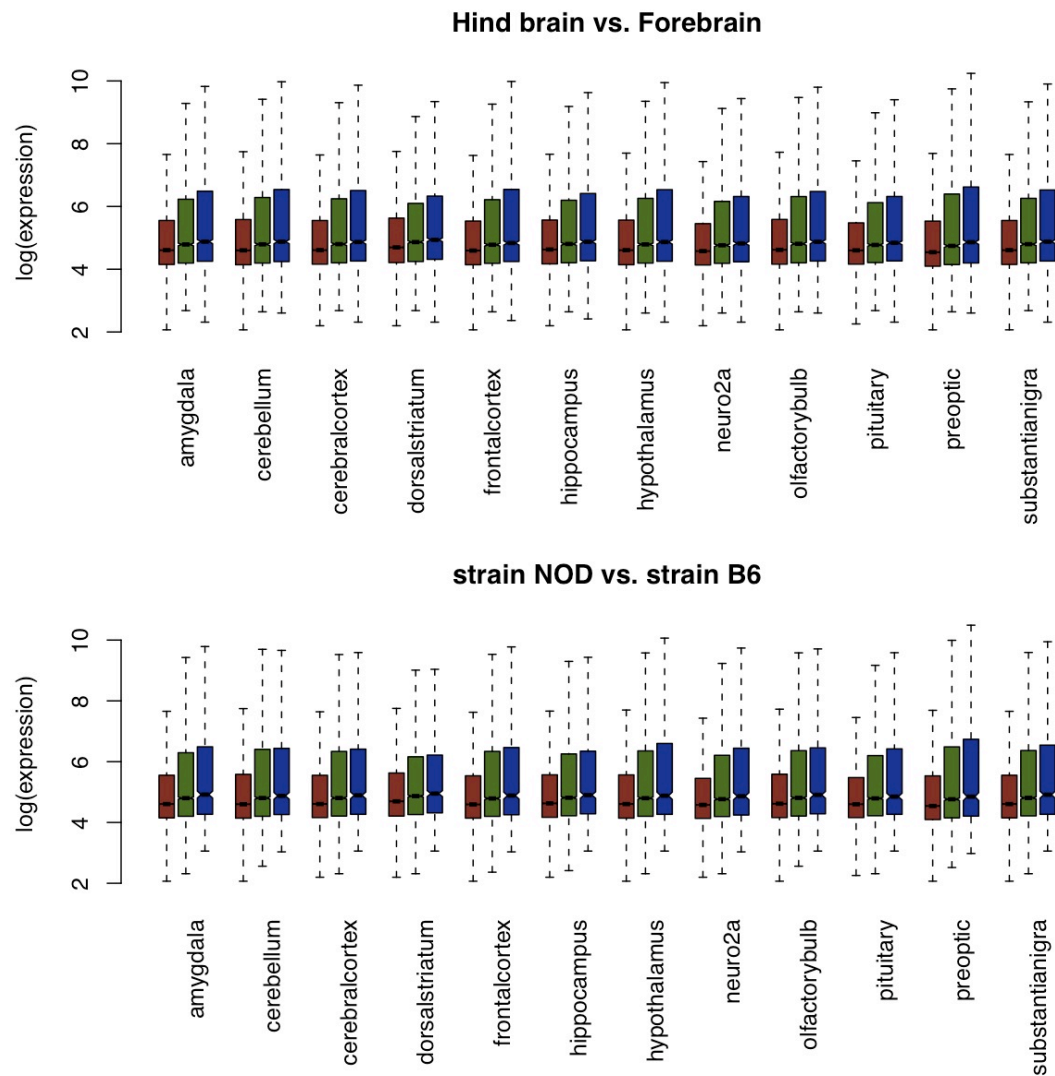

**Figure S10** Comparison with GNF Atlas data. GNF atlas gene expression and array annotation (GNF1M) were downloaded from <http://biogps.org/downloads/>. The expressions of two replicates of each brain tissue were log transformed and then averaged. Probe sets of 1.1ST array and GNF 1M array were matched through NCBI refseq IDs. The red boxplots were the expression from all probe sets in the GNF 1M array. In the upper panel, the green and blue boxplots showed the expression of the genes in GNF1M arrays that were equivalently expressed ( $p$ -value  $> 0.1$ ) or differentially expressed ( $p$ -value  $< 0.001$ ) between forebrain and hindbrain in 1.1ST arrays. In the lower panel, the green and blue boxplots showed the expression of the genes in GNF1M arrays that were equivalently expressed ( $p$ -value  $> 0.1$ ) or differentially expressed ( $p$ -value  $< 0.001$ ) between two strains in the 1.1ST arrays. Note equivalently expressed genes have higher expression level in GNF 1M array partly because genes that can be mapped by refseq IDs have higher expression level.

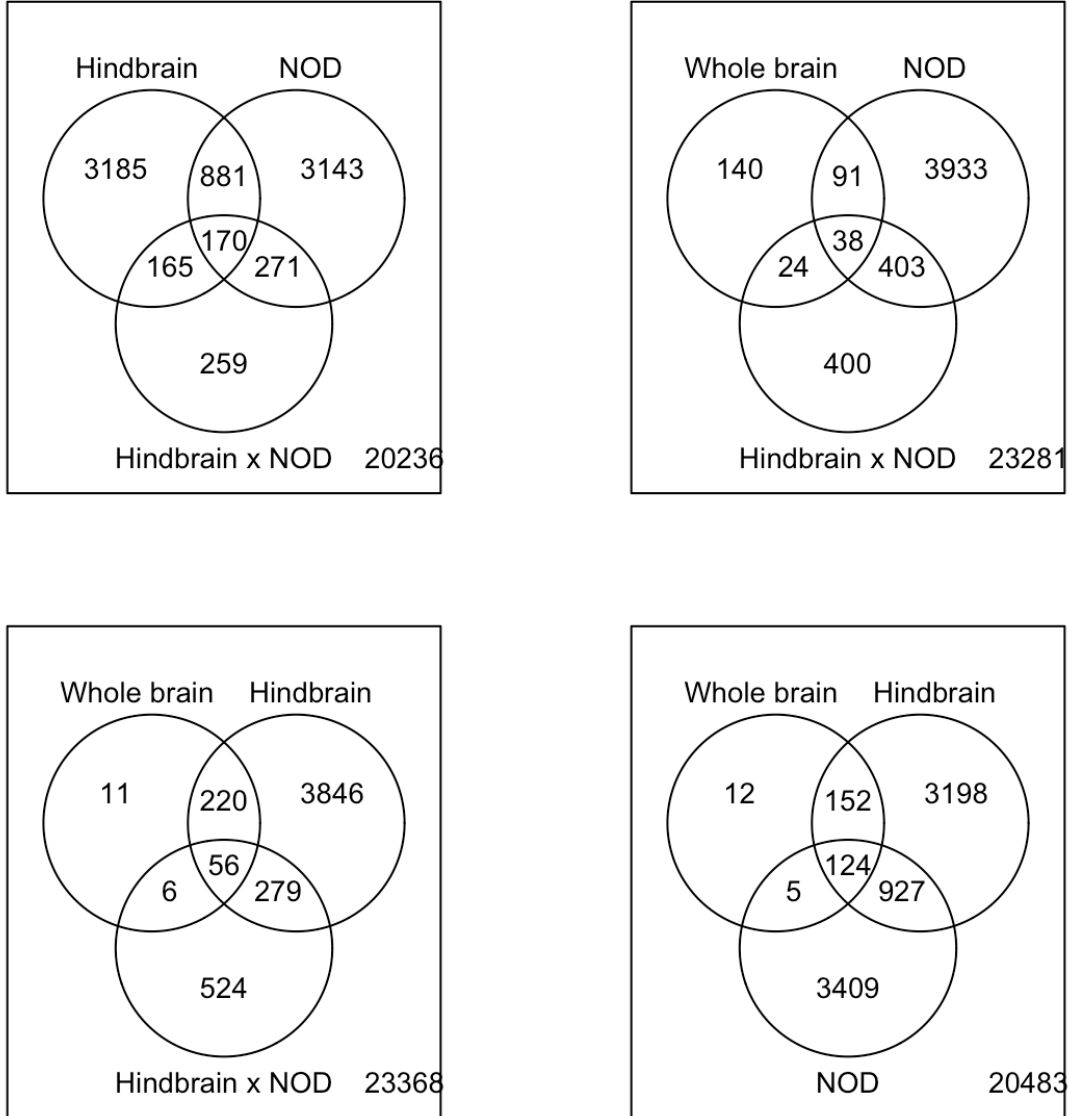

**Figure S11** Comparison of differentially expressed genes in 1.0ST cartridge array. This Venn diagram is based on the results from linear mixed effect model for all the 48 samples and p-value cutoff for differential expression is decided by FDR < 0.05. Circles labeled by Hindbrain/Whole brain describe the differential expression between forebrain and Hindbrain/ Whole brain, circles labeled by NOD describe the differential expression between strains B6 and NOD, and Hindbrain x NOD indicates interaction term between Hindbrain indicator and NOD strain indicator.

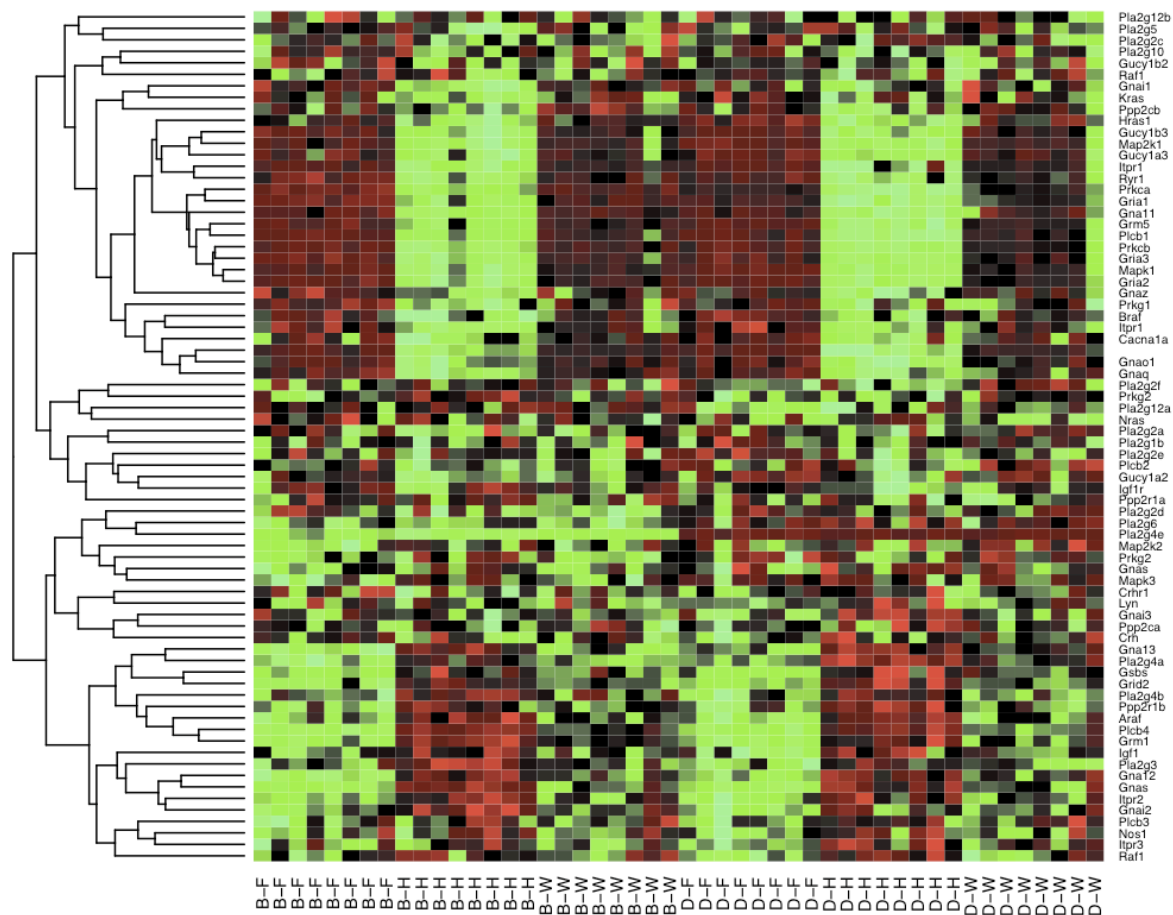

**Figure S12** Heatmap of the expression of pathway “Long-term depression”. Heatmap of the expression of the 76 probesets belonging to pathway “Long-term depression”. Each column of the heatmap corresponds to a sample and each row corresponds to a probeset. In the column labels, B and D indicates strain of B6 and NOD respectively, and F, H, and W indicate forebrain, hindbrain and whole brain, respectively.

**Figure S13: Heatmap of the expression of pathway “Melanoma”.**

Figure S13 is available for download as a PDF at <http://www.g3journal.org/lookup/suppl/doi:10.1534/g3.111.001602/-/DC1>.

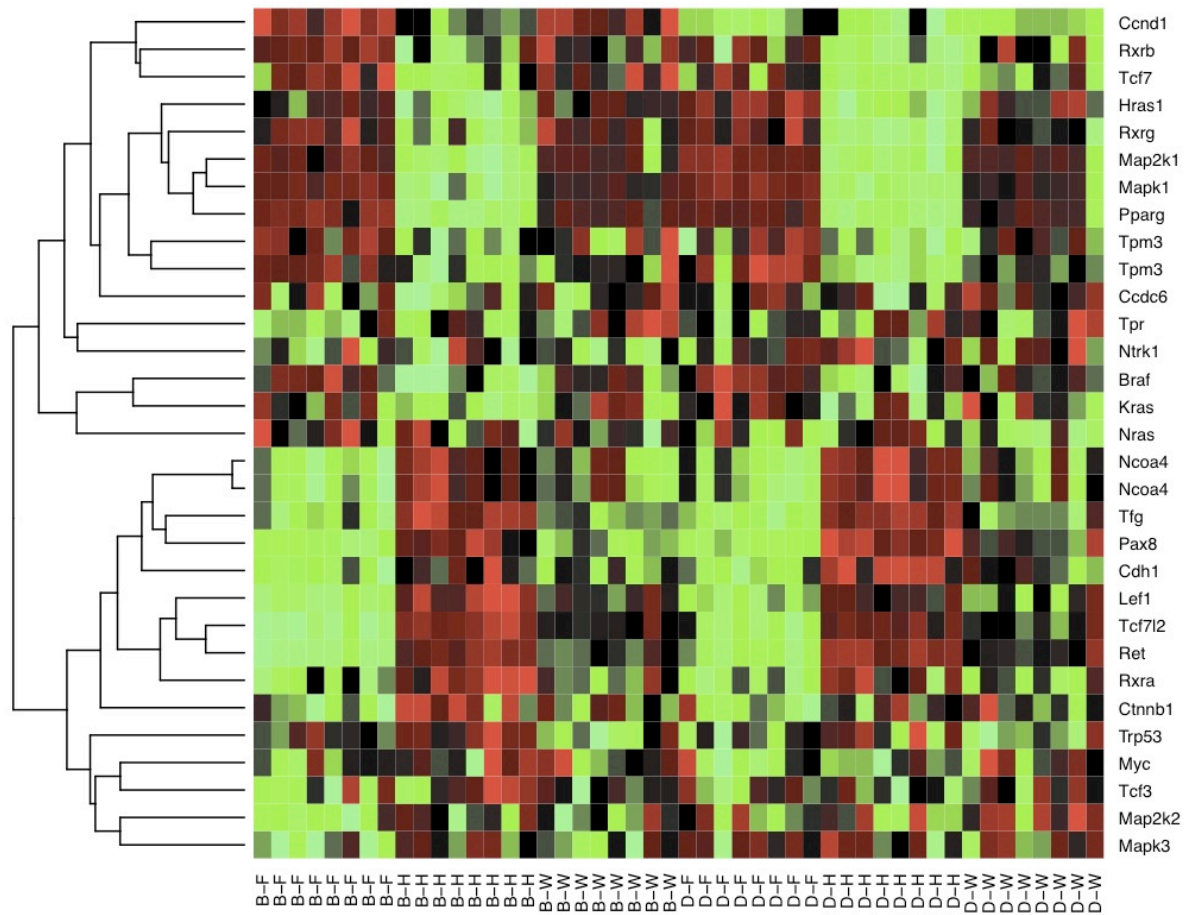

**Figure S14** Heatmap of the expression of pathway "Thyroid cancer".

1

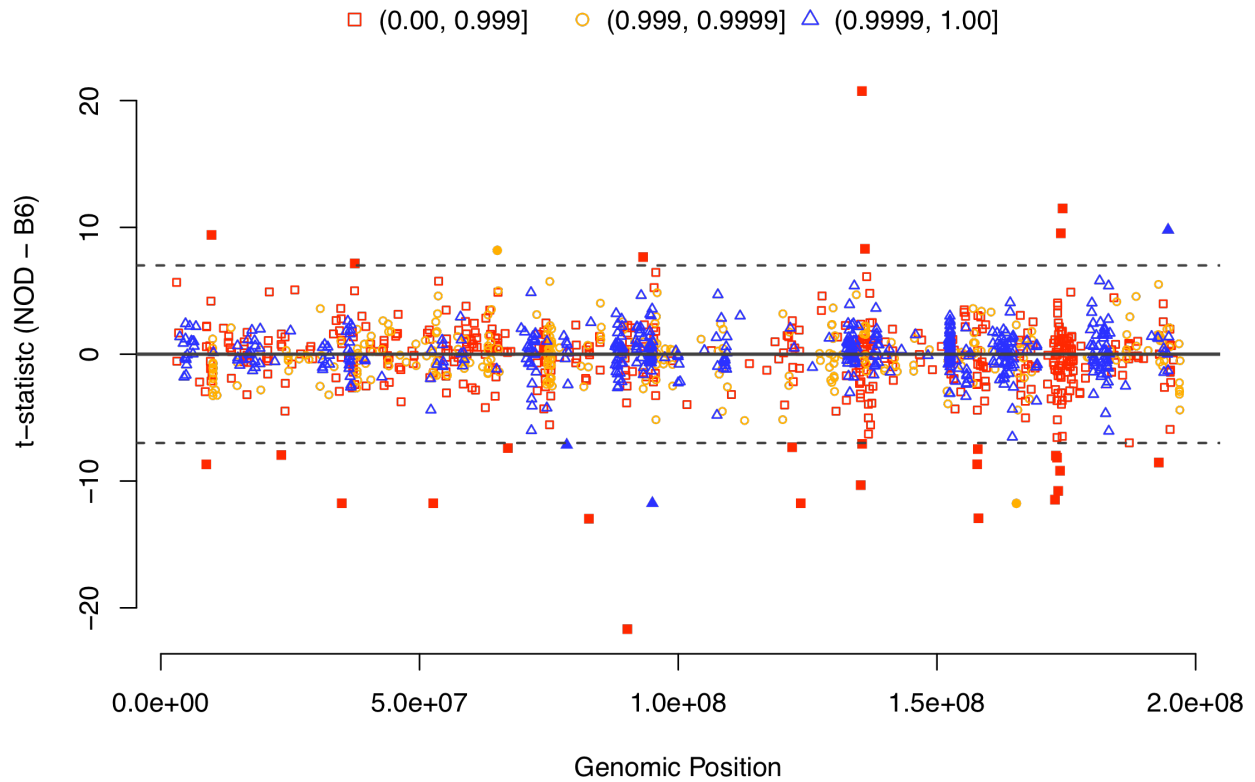

**Figure S15** Sequence similarity vs. strain effect in forebrain along chromosomes. This figure shows the relation between strain effect in forebrain and variable levels of sequence similarities along chromosome 1. The X-axis is genomic position by base pair and the Y-axis is the t-statistic comparing the expression in NOD/ShiLtJ vs. C57BL/6J so that positive t-statistics indicate higher expression in NOD. One point indicates one of the 22,963 transcripts with consistent sequence similarity measurement. Different color (as labeled at the top of the figure) indicates different level of sequence similarity. Two horizontal broken lines indicate t-statistics of 7 or -7, which approximately corresponds to p-value  $1e-5$ , the cutoff used in Figure 5 of the main text. Those transcripts with t-statistics beyond these cutoffs are labeled by filled points. Similar figures for other chromosomes can be found in File S2.

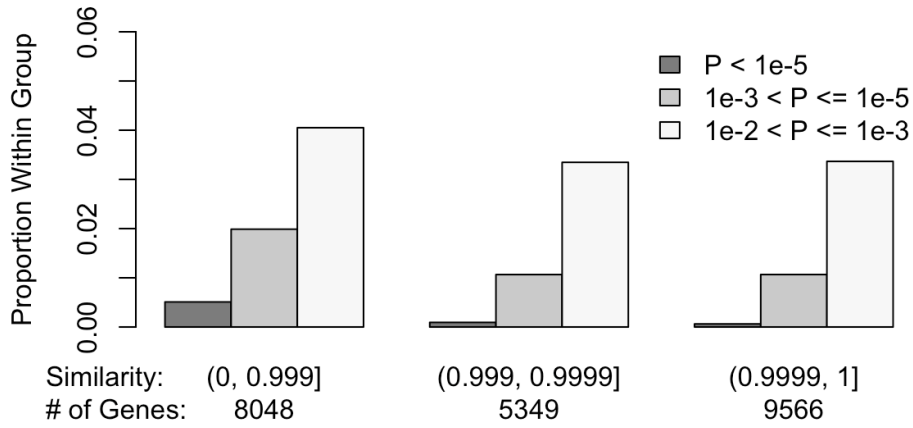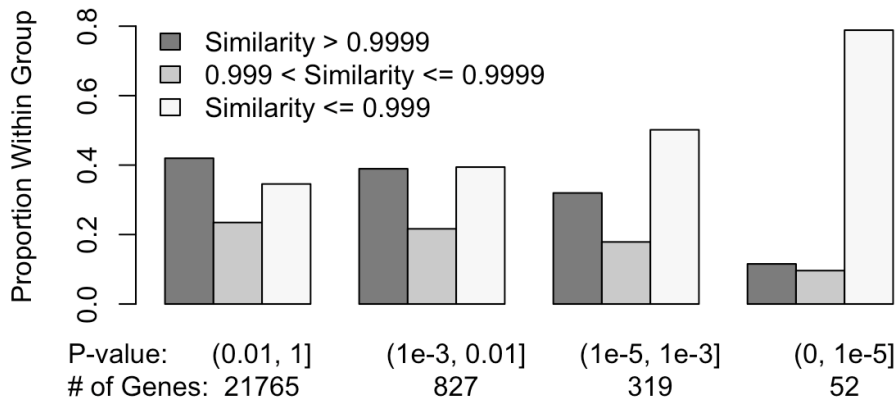

**Figure S16** Comparison strain x hindbrain interaction effects vs. DNA similarity. Comparisons of the categories of transcripts based on p-value of strain x hindbrain interaction and DNA similarity, for the 22,963 transcripts with consistent DNA similarity measurements along the gene body. In the upper panel, the transcripts were grouped based on DNA similarity and within each group we compared proportion of transcripts within different p-value ranges. In the lower panel, the transcripts were grouped based on strain x hindbrain interaction effect p-values and within each group we compared the proportion of transcripts with different DNA similarities.



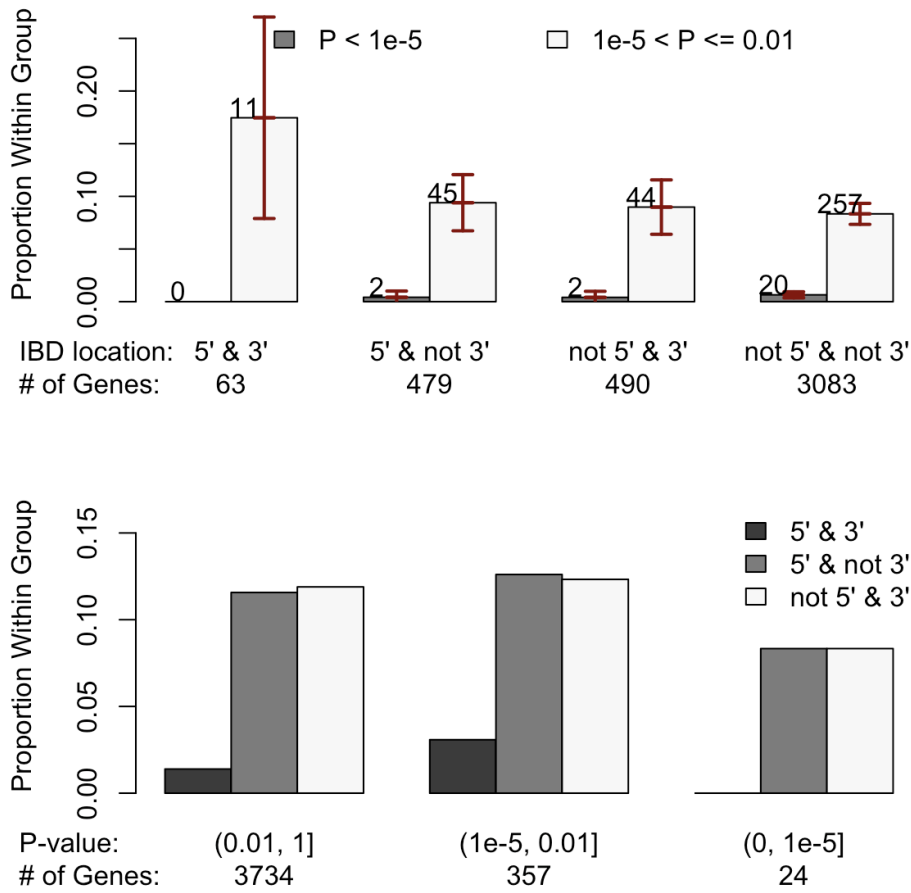

**Figure S17** Comparison strain x hindbrain interaction effects vs. DNA similarity at 5' and 3' regions. Comparisons of the categories of transcripts based on p-value of strain x hindbrain interaction and IBD status at 5' and 3' regions, for the 4,118 transcripts with variable DNA similarity measurements in the gene body. Here IBD is defined as DNA similarity > 0.999. In the upper panel, the transcripts were grouped based on IBD location and within each group we compared proportion of transcripts within different p-value ranges. The vertical bars indicated the 95% confidence intervals. In the lower panel, the transcripts were grouped based on strain x hindbrain interaction p-values and within each group we compared the proportion of transcripts with different IBD location statuses.

**Tables**

**Table S1 FDR at different p-value cutoffs for 1.1ST array.**

| p-value | Forebrain vs. hindbrain |              |              | Whole brain vs. forebrain |             |              | NOD vs. B6  |              |              | Clozapine vs. vehicle |        |       | Interaction: hindbrain-NOD |             |              |
|---------|-------------------------|--------------|--------------|---------------------------|-------------|--------------|-------------|--------------|--------------|-----------------------|--------|-------|----------------------------|-------------|--------------|
|         | D                       | FD           | FDR          | D                         | FD          | FDR          | D           | FD           | FDR          | D                     | FD     | FDR   | D                          | FD          | FDR          |
| 0.05    | 11141                   | 680.5        | 0.061        | 4128                      | 1093.9      | 0.265        | 6666        | 943.4        | 0.142        | 2418                  | 1259   | 0.521 | 4071                       | 1104.7      | 0.271        |
| 0.04    | <b>10570</b>            | <b>544.4</b> | <b>0.052</b> | 3654                      | 875.1       | 0.239        | 6099        | 754.7        | 0.124        | 2010                  | 1007.2 | 0.501 | 3564                       | 883.8       | 0.248        |
| 0.03    | 9910                    | 408.3        | 0.041        | 3120                      | 656.3       | 0.21         | 5495        | 566          | 0.103        | 1575                  | 755.4  | 0.48  | 3032                       | 662.8       | 0.219        |
| 0.02    | 9102                    | 272.2        | 0.03         | 2508                      | 437.6       | 0.174        | 4784        | 377.4        | 0.079        | 1125                  | 503.6  | 0.448 | 2457                       | 441.9       | 0.18         |
| 0.01    | 7954                    | 136.1        | 0.017        | 1745                      | 218.8       | 0.125        | <b>3896</b> | <b>188.7</b> | <b>0.048</b> | 638                   | 251.8  | 0.395 | 1697                       | 220.9       | 0.13         |
| 0.009   | 7810                    | 122.5        | 0.016        | 1646                      | 196.9       | 0.12         | 3759        | 169.8        | 0.045        | 588                   | 226.6  | 0.385 | 1596                       | 198.8       | 0.125        |
| 0.008   | 7648                    | 108.9        | 0.014        | 1562                      | 175         | 0.112        | 3628        | 150.9        | 0.042        | 530                   | 201.4  | 0.38  | 1506                       | 176.8       | 0.117        |
| 0.007   | 7455                    | 95.3         | 0.013        | 1468                      | 153.1       | 0.104        | 3496        | 132.1        | 0.038        | 472                   | 176.3  | 0.374 | 1411                       | 154.7       | 0.11         |
| 0.006   | 7219                    | 81.7         | 0.011        | 1372                      | 131.3       | 0.096        | 3338        | 113.2        | 0.034        | 412                   | 151.1  | 0.367 | 1304                       | 132.6       | 0.102        |
| 0.005   | 7005                    | 68.0         | 0.01         | 1245                      | 109.4       | 0.088        | 3178        | 94.3         | 0.03         | 346                   | 125.9  | 0.364 | 1195                       | 110.5       | 0.092        |
| 0.004   | 6748                    | 54.4         | 0.008        | 1103                      | 87.5        | 0.079        | 3029        | 75.5         | 0.025        | 274                   | 100.7  | 0.368 | 1065                       | 88.4        | 0.083        |
| 0.003   | 6403                    | 40.8         | 0.006        | 993                       | 65.6        | 0.066        | 2757        | 56.6         | 0.021        | 200                   | 75.5   | 0.378 | 919                        | 66.3        | 0.072        |
| 0.002   | 5976                    | 27.2         | 0.005        | <b>834</b>                | <b>43.8</b> | <b>0.053</b> | 2470        | 37.7         | 0.015        | 142                   | 50.4   | 0.355 | <b>778</b>                 | <b>44.2</b> | <b>0.057</b> |
| 0.001   | 5330                    | 13.6         | 0.003        | 625                       | 21.9        | 0.035        | 2087        | 18.9         | 0.009        | 61                    | 25.2   | 0.413 | 602                        | 22.1        | 0.037        |
| 9e-04   | 5245                    | 12.2         | 0.002        | 593                       | 19.7        | 0.033        | 2040        | 17           | 0.008        | 53                    | 22.7   | 0.428 | 579                        | 19.9        | 0.034        |
| 8e-04   | 5135                    | 10.9         | 0.002        | 563                       | 17.5        | 0.031        | 1975        | 15.1         | 0.008        | 48                    | 20.1   | 0.419 | 551                        | 17.7        | 0.032        |
| 7e-04   | 5026                    | 9.5          | 0.002        | 543                       | 15.3        | 0.028        | 1911        | 13.2         | 0.007        | 46                    | 17.6   | 0.383 | 526                        | 15.5        | 0.029        |
| 6e-04   | 4902                    | 8.2          | 0.002        | 510                       | 13.1        | 0.026        | 1853        | 11.3         | 0.006        | 38                    | 15.1   | 0.397 | 501                        | 13.3        | 0.027        |
| 5e-04   | 4764                    | 6.8          | 0.001        | 466                       | 10.9        | 0.023        | 1766        | 9.4          | 0.005        | 33                    | 12.6   | 0.382 | 453                        | 11          | 0.024        |
| 4e-04   | 4598                    | 5.4          | 0.001        | 427                       | 8.8         | 0.021        | 1663        | 7.5          | 0.005        | 24                    | 10.1   | 0.421 | 407                        | 8.8         | 0.022        |
| 3e-04   | 4375                    | 4.1          | 0.001        | 397                       | 6.6         | 0.017        | 1545        | 5.7          | 0.004        | 17                    | 7.6    | 0.447 | 364                        | 6.6         | 0.018        |
| 2e-04   | 4112                    | 2.7          | 0.001        | 339                       | 4.4         | 0.013        | 1402        | 3.8          | 0.003        | 10                    | 5      | 0.5   | 294                        | 4.4         | 0.015        |
| 1e-04   | 3683                    | 1.4          | 0            | 275                       | 2.2         | 0.008        | 1206        | 1.9          | 0.002        | 4                     | 2.5    | 0.625 | 237                        | 2.2         | 0.009        |

For a p-value cutoff  $p$ , the expected number of false discoveries (FD) is  $\pi_0 N p$  ( $N$  is the total number of transcripts), the number of discoveries ( $D$ ) was the number of transcripts with p-values  $< p$ , and FDR is calculated as  $FD/D$ .

**Table S2 FDR at different p-value cutoffs for 1.0ST array.**

| p-value | Forebrain vs. hindbrain |              |             | Whole brain vs. forebrain |             |              | NOD vs. B6  |              |             | Clozapine vs. vehicle |        |       | Interaction: hindbrain-NOD |             |              |
|---------|-------------------------|--------------|-------------|---------------------------|-------------|--------------|-------------|--------------|-------------|-----------------------|--------|-------|----------------------------|-------------|--------------|
|         | D                       | FD           | FDR         | D                         | FD          | FDR          | D           | FD           | FDR         | D                     | FD     | FDR   | D                          | FD          | FDR          |
| 0.05    | 7351                    | 888.2        | 0.121       | 2877                      | 1235.3      | 0.429        | 7446        | 893.9        | 0.12        | 3391                  | 1138.9 | 0.336 | 4196                       | 1109.9      | 0.265        |
| 0.04    | 6837                    | 710.6        | 0.104       | 2494                      | 988.2       | 0.396        | 6877        | 715.1        | 0.104       | 2898                  | 911.1  | 0.314 | 3733                       | 887.9       | 0.238        |
| 0.03    | 6213                    | 532.9        | 0.086       | 2088                      | 741.2       | 0.355        | 6275        | 536.3        | 0.085       | 2355                  | 683.3  | 0.29  | 3180                       | 665.9       | 0.209        |
| 0.02    | 5429                    | 355.3        | 0.065       | 1623                      | 494.1       | 0.304        | 5502        | 357.6        | 0.065       | 1772                  | 455.6  | 0.257 | 2585                       | 444         | 0.172        |
| 0.01    | <b>4401</b>             | <b>177.6</b> | <b>0.04</b> | 1125                      | 247.1       | 0.22         | <b>4465</b> | <b>178.8</b> | <b>0.04</b> | 1085                  | 227.8  | 0.21  | 1803                       | 222         | 0.123        |
| 0.009   | 4266                    | 159.9        | 0.037       | 1080                      | 222.4       | 0.206        | 4328        | 160.9        | 0.037       | 1005                  | 205    | 0.204 | 1710                       | 199.8       | 0.117        |
| 0.008   | 4119                    | 142.1        | 0.034       | 1010                      | 197.6       | 0.196        | 4168        | 143          | 0.034       | 924                   | 182.2  | 0.197 | 1619                       | 177.6       | 0.11         |
| 0.007   | 3964                    | 124.3        | 0.031       | 944                       | 172.9       | 0.183        | 4015        | 125.1        | 0.031       | 834                   | 159.4  | 0.191 | 1527                       | 155.4       | 0.102        |
| 0.006   | 3776                    | 106.6        | 0.028       | 881                       | 148.2       | 0.168        | 3860        | 107.3        | 0.028       | 753                   | 136.7  | 0.182 | 1406                       | 133.2       | 0.095        |
| 0.005   | 3610                    | 88.8         | 0.025       | 804                       | 123.5       | 0.154        | 3696        | 89.4         | 0.024       | 663                   | 113.9  | 0.172 | 1300                       | 111         | 0.085        |
| 0.004   | 3417                    | 71.1         | 0.021       | 726                       | 98.8        | 0.136        | 3467        | 71.5         | 0.021       | 560                   | 91.1   | 0.163 | 1179                       | 88.8        | 0.075        |
| 0.003   | 3161                    | 53.3         | 0.017       | 616                       | 74.1        | 0.12         | 3187        | 53.6         | 0.017       | 459                   | 68.3   | 0.149 | 1027                       | 66.6        | 0.065        |
| 0.002   | 2823                    | 35.5         | 0.013       | 498                       | 49.4        | 0.099        | 2854        | 35.8         | 0.013       | 347                   | 45.6   | 0.131 | <b>865</b>                 | <b>44.4</b> | <b>0.051</b> |
| 0.001   | 2351                    | 17.8         | 0.008       | 364                       | 24.7        | 0.068        | 2437        | 17.9         | 0.007       | 180                   | 22.8   | 0.127 | 672                        | 22.2        | 0.033        |
| 9e-04   | 2285                    | 16           | 0.007       | 355                       | 22.2        | 0.063        | 2365        | 16.1         | 0.007       | 167                   | 20.5   | 0.123 | 652                        | 20          | 0.031        |
| 8e-04   | 2212                    | 14.2         | 0.006       | 337                       | 19.8        | 0.059        | 2295        | 14.3         | 0.006       | 153                   | 18.2   | 0.119 | 622                        | 17.8        | 0.029        |
| 7e-04   | 2127                    | 12.4         | 0.006       | 316                       | 17.3        | 0.055        | 2233        | 12.5         | 0.006       | 135                   | 15.9   | 0.118 | 588                        | 15.5        | 0.026        |
| 6e-04   | 2034                    | 10.7         | 0.005       | <b>293</b>                | <b>14.8</b> | <b>0.051</b> | 2147        | 10.7         | 0.005       | 113                   | 13.7   | 0.121 | 555                        | 13.3        | 0.024        |
| 5e-04   | 1937                    | 8.9          | 0.005       | 273                       | 12.4        | 0.045        | 2051        | 8.9          | 0.004       | 92                    | 11.4   | 0.124 | 519                        | 11.1        | 0.021        |
| 4e-04   | 1811                    | 7.1          | 0.004       | 259                       | 9.9         | 0.038        | 1957        | 7.2          | 0.004       | 79                    | 9.1    | 0.115 | 482                        | 8.9         | 0.018        |
| 3e-04   | 1669                    | 5.3          | 0.003       | 231                       | 7.4         | 0.032        | 1828        | 5.4          | 0.003       | 61                    | 6.8    | 0.111 | 438                        | 6.7         | 0.015        |
| 2e-04   | 1521                    | 3.6          | 0.002       | 203                       | 4.9         | 0.024        | 1652        | 3.6          | 0.002       | 41                    | 4.6    | 0.112 | 378                        | 4.4         | 0.012        |
| 1e-04   | 1287                    | 1.8          | 0.001       | 140                       | 2.5         | 0.018        | 1386        | 1.8          | 0.001       | 23                    | 2.3    | 0.1   | 310                        | 2.2         | 0.007        |

For a p-value cutoff  $p$ , the expected number of false discoveries (FD) is  $\pi_0 N p$  ( $N$  is the total number of genes), the number of discoveries ( $D$ ) was the number of genes with p-values  $< p$ , and FDR is  $FD/D$ .

**Table S3 The 122 GO terms associated with brain region effects**

| GO ID      | GO type | Size | GO Term Name                                     | P-val   | P-val   |
|------------|---------|------|--------------------------------------------------|---------|---------|
|            |         |      |                                                  | F vs. H | W vs. H |
| GO:0006887 | BP      | 109  | exocytosis                                       | 0       | 0       |
| GO:0008283 | BP      | 737  | cell proliferation                               | 0       | 0       |
| GO:0016192 | BP      | 446  | vesicle-mediated transport                       | 0       | 0       |
| GO:0019226 | BP      | 250  | transmission of nerve impulse                    | 0       | 0       |
| GO:0005262 | MF      | 70   | calcium channel activity                         | 0       | 0       |
| GO:0007155 | BP      | 614  | cell adhesion                                    | 0       | 2e-04   |
| GO:0022610 | BP      | 614  | biological adhesion                              | 0       | 2e-04   |
| GO:0048489 | BP      | 28   | synaptic vesicle transport                       | 0       | 2e-04   |
| GO:0000267 | CC      | 607  | cell fraction                                    | 0       | 2e-04   |
| GO:0042391 | BP      | 108  | regulation of membrane potential                 | 0       | 4e-04   |
| GO:0051128 | BP      | 281  | regulation of cellular component organization    | 0       | 4e-04   |
| GO:0007275 | BP      | 2721 | multicellular organismal development             | 0       | 6e-04   |
| GO:0021987 | BP      | 36   | cerebral cortex development                      | 0       | 6e-04   |
| GO:0016788 | MF      | 666  | hydrolase activity, acting on ester bonds        | 0       | 6e-04   |
| GO:0042578 | MF      | 324  | phosphoric ester hydrolase activity              | 0       | 6e-04   |
| GO:0007267 | BP      | 336  | cell-cell signaling                              | 0       | 8e-04   |
| GO:0016790 | MF      | 102  | thiolester hydrolase activity                    | 0       | 8e-04   |
| GO:0031344 | BP      | 54   | regulation of cell projection organization       | 0       | 0.001   |
| GO:0048869 | BP      | 1765 | cellular developmental process                   | 0       | 0.001   |
| GO:0008066 | MF      | 29   | glutamate receptor activity                      | 0       | 0.001   |
| GO:0016044 | BP      | 276  | cellular membrane organization                   | 0       | 0.0014  |
| GO:0042063 | BP      | 50   | gliogenesis                                      | 0       | 0.0014  |
| GO:0007156 | BP      | 78   | homophilic cell adhesion                         | 0       | 0.0016  |
| GO:0022603 | BP      | 200  | regulation of anatomical structure morphogenesis | 0       | 0.0018  |
| GO:0045211 | CC      | 126  | postsynaptic membrane                            | 0       | 0.002   |
| GO:0006575 | BP      | 159  | cellular amino acid derivative metabolic process | 0       | 0.0022  |
| GO:0022604 | BP      | 98   | regulation of cell morphogenesis                 | 0       | 0.0024  |
| GO:0006897 | BP      | 189  | endocytosis                                      | 0       | 0.0028  |
| GO:0010324 | BP      | 189  | membrane invagination                            | 0       | 0.0028  |
| GO:0050770 | BP      | 39   | regulation of axonogenesis                       | 0       | 0.0032  |
| GO:0051239 | BP      | 767  | regulation of multicellular organismal process   | 0       | 0.0032  |
| GO:0008081 | MF      | 69   | phosphoric diester hydrolase activity            | 0       | 0.0032  |
| GO:0006576 | BP      | 102  | cellular biogenic amine metabolic process        | 0       | 0.0042  |
| GO:0007270 | BP      | 37   | nerve-nerve synaptic transmission                | 0       | 0.0048  |
| GO:0048856 | BP      | 2274 | anatomical structure development                 | 0       | 0.0048  |

|            |    |      |                                                          |       |        |
|------------|----|------|----------------------------------------------------------|-------|--------|
| GO:0048468 | BP | 801  | cell development                                         | 0     | 0.0056 |
| GO:0048168 | BP | 21   | regulation of neuronal synaptic plasticity               | 0     | 0.0074 |
| GO:0051493 | BP | 89   | regulation of cytoskeleton organization                  | 0     | 0.0076 |
| GO:0030041 | BP | 53   | actin filament polymerization                            | 0     | 0.0086 |
| GO:0016337 | BP | 178  | cell-cell adhesion                                       | 0     | 0.009  |
| GO:0004620 | MF | 61   | phospholipase activity                                   | 0     | 0.0096 |
| GO:0005267 | MF | 132  | potassium channel activity                               | 0     | 0.0126 |
| GO:0000902 | BP | 360  | cell morphogenesis                                       | 0     | 0.0134 |
| GO:0008092 | MF | 395  | cytoskeletal protein binding                             | 0     | 0.0146 |
| GO:0048646 | BP | 355  | anatomical structure formation involved in morphogenesis | 0     | 0.0148 |
| GO:0032989 | BP | 398  | cellular component morphogenesis                         | 0     | 0.015  |
| GO:0065003 | BP | 330  | macromolecular complex assembly                          | 0     | 0.0162 |
| GO:0005886 | CC | 2802 | plasma membrane                                          | 0     | 0.0182 |
| GO:0044459 | CC | 1345 | plasma membrane part                                     | 0     | 0.0186 |
| GO:0007015 | BP | 95   | actin filament organization                              | 0     | 0.0188 |
| GO:0030036 | BP | 186  | actin cytoskeleton organization                          | 0     | 0.022  |
| GO:0003779 | MF | 290  | actin binding                                            | 0     | 0.026  |
| GO:0034622 | BP | 275  | cellular macromolecular complex assembly                 | 0     | 0.027  |
| GO:0021954 | BP | 33   | central nervous system neuron development                | 0     | 0.0308 |
| GO:0032956 | BP | 59   | regulation of actin cytoskeleton organization            | 0     | 0.0316 |
| GO:0030029 | BP | 199  | actin filament-based process                             | 0     | 0.0336 |
| GO:0010926 | BP | 791  |                                                          | 0     | 0.0346 |
| GO:0016298 | MF | 82   | lipase activity                                          | 0     | 0.035  |
| GO:0060284 | BP | 145  | regulation of cell development                           | 0     | 0.0354 |
| GO:0019199 | MF | 69   | transmembrane receptor protein kinase activity           | 0     | 0.0404 |
| GO:0030155 | BP | 86   | regulation of cell adhesion                              | 0     | 0.0438 |
| GO:0022607 | BP | 486  | cellular component assembly                              | 0     | 0.0448 |
| GO:0051960 | BP | 138  | regulation of nervous system development                 | 0     | 0.0468 |
| GO:0001725 | CC | 21   | stress fiber                                             | 0     | 0.0516 |
| GO:0004714 | MF | 56   | transmembrane receptor protein tyrosine kinase activity  | 0     | 0.052  |
| GO:0001525 | BP | 147  | angiogenesis                                             | 0     | 0.0554 |
| GO:0050767 | BP | 124  | regulation of neurogenesis                               | 0     | 0.0592 |
| GO:0017016 | MF | 61   | Ras GTPase binding                                       | 0     | 0.0638 |
| GO:0007519 | BP | 91   | skeletal muscle tissue development                       | 0     | 0.0642 |
| GO:0060538 | BP | 92   | skeletal muscle organ development                        | 0     | 0.0684 |
| GO:0045664 | BP | 99   | regulation of neuron differentiation                     | 0     | 0.0704 |
| GO:0017048 | MF | 22   | Rho GTPase binding                                       | 0     | 0.1924 |
| GO:0044456 | CC | 197  | synapse part                                             | 2e-04 | 0      |
| GO:0004721 | MF | 168  | phosphoprotein phosphatase activity                      | 4e-04 | 0      |

|            |    |      |                                                        |        |   |
|------------|----|------|--------------------------------------------------------|--------|---|
| GO:0007268 | BP | 209  | synaptic transmission                                  | 6e-04  | 0 |
| GO:0032879 | BP | 361  | regulation of localization                             | 6e-04  | 0 |
| GO:0070838 | BP | 140  | divalent metal ion transport                           | 6e-04  | 0 |
| GO:0030425 | CC | 63   | dendrite                                               | 8e-04  | 0 |
| GO:0016791 | MF | 256  | phosphatase activity                                   | 8e-04  | 0 |
| GO:0006816 | BP | 137  | calcium ion transport                                  | 0.001  | 0 |
| GO:0044057 | BP | 162  | regulation of system process                           | 0.001  | 0 |
| GO:0006461 | BP | 196  | protein complex assembly                               | 0.0012 | 0 |
| GO:0070271 | BP | 196  | protein complex biogenesis                             | 0.0012 | 0 |
| GO:0001505 | BP | 72   | regulation of neurotransmitter levels                  | 0.0016 | 0 |
| GO:0007269 | BP | 48   | neurotransmitter secretion                             | 0.0018 | 0 |
| GO:0016358 | BP | 48   | dendrite development                                   | 0.0022 | 0 |
| GO:0051049 | BP | 212  | regulation of transport                                | 0.0032 | 0 |
| GO:0030665 | CC | 25   | clathrin coated vesicle membrane                       | 0.0032 | 0 |
| GO:0050673 | BP | 79   | epithelial cell proliferation                          | 0.0034 | 0 |
| GO:0046903 | BP | 264  | secretion                                              | 0.004  | 0 |
| GO:0032940 | BP | 235  | secretion by cell                                      | 0.0042 | 0 |
| GO:0044448 | CC | 65   | cell cortex part                                       | 0.0042 | 0 |
| GO:0051641 | BP | 732  | cellular localization                                  | 0.0044 | 0 |
| GO:0043005 | CC | 218  | neuron projection                                      | 0.0044 | 0 |
| GO:0016311 | BP | 148  | dephosphorylation                                      | 0.0066 | 0 |
| GO:0043112 | BP | 29   | receptor metabolic process                             | 0.0074 | 0 |
| GO:0043687 | BP | 1117 | post-translational protein modification                | 0.0106 | 0 |
| GO:0030136 | CC | 75   | clathrin-coated vesicle                                | 0.0106 | 0 |
| GO:0005097 | MF | 43   | Rab GTPase activator activity                          | 0.0108 | 0 |
| GO:0050768 | BP | 39   | negative regulation of neurogenesis                    | 0.012  | 0 |
| GO:0005516 | MF | 112  | calmodulin binding                                     | 0.0124 | 0 |
| GO:0003001 | BP | 119  | generation of a signal involved in cell-cell signaling | 0.0126 | 0 |
| GO:0051046 | BP | 96   | regulation of secretion                                | 0.0128 | 0 |
| GO:0005057 | MF | 93   | receptor signaling protein activity                    | 0.0136 | 0 |
| GO:0008021 | CC | 59   | synaptic vesicle                                       | 0.0152 | 0 |
| GO:0046474 | BP | 45   | glycerophospholipid biosynthetic process               | 0.0184 | 0 |
| GO:0030662 | CC | 38   | coated vesicle membrane                                | 0.0184 | 0 |
| GO:0030135 | CC | 90   | coated vesicle                                         | 0.0194 | 0 |
| GO:0060341 | BP | 117  | regulation of cellular localization                    | 0.0226 | 0 |
| GO:0016529 | CC | 34   | sarcoplasmic reticulum                                 | 0.027  | 0 |
| GO:0009056 | BP | 1528 | catabolic process                                      | 0.03   | 0 |
| GO:0003713 | MF | 72   | transcription coactivator activity                     | 0.0312 | 0 |
| GO:0016528 | CC | 36   | sarcoplasm                                             | 0.0356 | 0 |
| GO:0044248 | BP | 890  | cellular catabolic process                             | 0.0392 | 0 |

|            |    |      |                                                |        |   |
|------------|----|------|------------------------------------------------|--------|---|
| GO:0007416 | BP | 24   | synapse assembly                               | 0.0478 | 0 |
| GO:0048873 | BP | 23   | homeostasis of number of cells within a tissue | 0.0716 | 0 |
| GO:0017157 | BP | 24   | regulation of exocytosis                       | 0.1088 | 0 |
| GO:0044444 | CC | 4121 | cytoplasmic part                               | 0.1206 | 0 |
| GO:0016569 | BP | 68   | covalent chromatin modification                | 0.1242 | 0 |
| GO:0016570 | BP | 64   | histone modification                           | 0.1392 | 0 |
| GO:0048872 | BP | 137  | homeostasis of number of cells                 | 0.1614 | 0 |
| GO:0001894 | BP | 56   | tissue homeostasis                             | 0.1778 | 0 |

---

The columns "P-val F vs. H" and "P-val W vs. H" are the p-values comparing the expression of forebrain vs. hindbrain, and comparing whole brain vs. hindbrain, respectively.

**Table S4 The 41 GO terms associated with strain effect in hindbrain.**

| GO ID      | GO type | GO name                                                         | Size | P-value  |
|------------|---------|-----------------------------------------------------------------|------|----------|
| GO:0000323 | CC      | lytic vacuole                                                   | 160  | 0        |
| GO:0005764 | CC      | lysosome                                                        | 160  | 0        |
| GO:0044456 | CC      | synapse part                                                    | 197  | 0        |
| GO:0008076 | CC      | voltage-gated potassium channel complex                         | 57   | 0        |
| GO:0034705 | CC      | potassium channel complex                                       | 57   | 0        |
| GO:0030135 | CC      | coated vesicle                                                  | 90   | 0        |
| GO:0030136 | CC      | clathrin-coated vesicle                                         | 75   | 0        |
| GO:0005789 | CC      | endoplasmic reticulum membrane                                  | 99   | 0        |
| GO:0008021 | CC      | synaptic vesicle                                                | 59   | 0        |
| GO:0005768 | CC      | endosome                                                        | 242  | 8.00e-04 |
| GO:0045202 | CC      | synapse                                                         | 311  | 8.00e-04 |
| GO:0044432 | CC      | endoplasmic reticulum part                                      | 118  | 8.00e-04 |
| GO:0042175 | CC      | nuclear envelope-endoplasmic reticulum network                  | 103  | 0.0012   |
| GO:0044463 | CC      | cell projection part                                            | 103  | 0.0016   |
| GO:0005773 | CC      | vacuole                                                         | 187  | 0.0016   |
| GO:0045211 | CC      | postsynaptic membrane                                           | 126  | 0.0016   |
| GO:0031988 | CC      | membrane-bounded vesicle                                        | 251  | 0.002    |
| GO:0016023 | CC      | cytoplasmic membrane-bounded vesicle                            | 244  | 0.002    |
| GO:0043025 | CC      | neuronal cell body                                              | 84   | 0.002    |
| GO:0005856 | CC      | cytoskeleton                                                    | 1008 | 0.0029   |
| GO:0005097 | MF      | Rab GTPase activator activity                                   | 43   | 0        |
| GO:0016301 | MF      | kinase activity                                                 | 846  | 0        |
| GO:0016627 | MF      | oxidoreductase activity, acting on the CH-CH group of donors    | 48   | 0        |
| GO:0051536 | MF      | iron-sulfur cluster binding                                     | 48   | 0        |
| GO:0051540 | MF      | metal cluster binding                                           | 48   | 0        |
| GO:0005509 | MF      | calcium ion binding                                             | 829  | 0        |
| GO:0046873 | MF      | metal ion transmembrane transporter activity                    | 292  | 0        |
| GO:0031406 | MF      | carboxylic acid binding                                         | 69   | 0        |
| GO:0005215 | MF      | transporter activity                                            | 1048 | 0        |
| GO:0016772 | MF      | transferase activity, transferring phosphorus-containing groups | 981  | 4.00e-04 |
| GO:0019842 | MF      | vitamin binding                                                 | 119  | 4.00e-04 |
| GO:0016597 | MF      | amino acid binding                                              | 25   | 4.00e-04 |
| GO:0016773 | MF      | phosphotransferase activity, alcohol group as acceptor          | 698  | 8.00e-04 |
| GO:0005267 | MF      | potassium channel activity                                      | 132  | 8.00e-04 |
| GO:0005249 | MF      | voltage-gated potassium channel activity                        | 85   | 8.00e-04 |
| GO:0022843 | MF      | voltage-gated cation channel activity                           | 132  | 8.00e-04 |
| GO:0005261 | MF      | cation channel activity                                         | 252  | 8.00e-04 |



**Table S5 The 35 pathways associated with brain region effect.**

| Pathway ID | Size | Pathway Name                                           | P-val<br>F vs. H | P-val<br>W vs. H |
|------------|------|--------------------------------------------------------|------------------|------------------|
| 05218      | 75   | Melanoma                                               | 2e-04            | 0.0016           |
| 04720      | 77   | Long-term potentiation                                 | 8e-04            | 2e-04            |
| 00562      | 55   | Inositol phosphate metabolism                          | 8e-04            | 0.0036           |
| 05216      | 31   | Thyroid cancer                                         | 0.0018           | 0.0028           |
| 04730      | 76   | Long-term depression                                   | 0.0026           | 0                |
| 04020      | 204  | Calcium signaling pathway                              | 0.003            | 0                |
| 04270      | 133  | Vascular smooth muscle contraction                     | 0.0036           | 0.0024           |
| 04810      | 224  | Regulation of actin cytoskeleton                       | 0                | 0.0064           |
| 04360      | 140  | Axon guidance                                          | 0                | 0.0116           |
| 00500      | 36   | Starch and sucrose metabolism                          | 0                | 0.2154           |
| 04540      | 95   | Gap junction                                           | 6e-04            | 0.0088           |
| 04520      | 87   | Adherens junction                                      | 8e-04            | 0.0228           |
| 01040      | 28   | Biosynthesis of unsaturated fatty acids                | 0.001            | 0.0368           |
| 04510      | 209  | Focal adhesion                                         | 0.0014           | 0.0306           |
| 04320      | 22   | Dorso-ventral axis formation                           | 0.0016           | 0.0536           |
| 00512      | 29   | O-Glycan biosynthesis                                  | 0.0026           | 0.2054           |
| 04010      | 287  | MAPK signaling pathway                                 | 0.0028           | 0.0056           |
| 04920      | 71   | Adipocytokine signaling pathway                        | 0.003            | 0.116            |
| 04070      | 79   | Phosphatidylinositol signaling system                  | 0.0036           | 0.0042           |
| 04080      | 260  | Neuroactive ligand-receptor interaction                | 0.004            | 0.0142           |
| 00380      | 41   | Tryptophan metabolism                                  | 0.004            | 0.0672           |
| 05412      | 83   | Arrhythmogenic right ventricular cardiomyopathy (ARVC) | 0.0048           | 4e-04            |
| 04916      | 105  | Melanogenesis                                          | 0.0076           | 4e-04            |
| 04912      | 105  | GnRH signaling pathway                                 | 0.0084           | 0.0034           |
| 00564      | 70   | Glycerophospholipid metabolism                         | 0.0104           | 0.001            |
| 05214      | 70   | Glioma                                                 | 0.0166           | 0.0022           |
| 04144      | 221  | Endocytosis                                            | 0.0188           | 0.0036           |
| 00563      | 25   | Glycosylphosphatidylinositol(GPI)-anchor biosynthesis  | 0.0206           | 0.001            |
| 04512      | 83   | ECM-receptor interaction                               | 0.0222           | 0.002            |
| 05410      | 92   | Hypertrophic cardiomyopathy (HCM)                      | 0.0408           | 0.0012           |
| 00620      | 50   | Pyruvate metabolism                                    | 0.044            | 0.0016           |
| 00310      | 45   | Lysine degradation                                     | 0.072            | 0                |
| 04260      | 89   | Cardiac muscle contraction                             | 0.1026           | 0.0014           |
| 04514      | 159  | Cell adhesion molecules (CAMs)                         | 0.1278           | 0.0026           |
| 04662      | 90   | B cell receptor signaling pathway                      | 0.5024           | 0.0034           |

The columns "P-val F vs. H" and "P-val W vs. H" are the p-values comparing the expression of forebrain vs. hindbrain, and comparing whole brain vs. hindbrain, respectively.
