# Supplementary material for: Transcriptome Atlases of Mouse Brain Reveals Differential Expression Across Brain Regions and Genetic Backgrounds
Source: Oxford University Press journal article supplement (doi:10.1534/g3.111.001602), 2012-02-01
Supplement: 203_figures5.pdf [file 203_figures5.pdf]

(a) Eigenvalues and projection plots for the first three PCs.

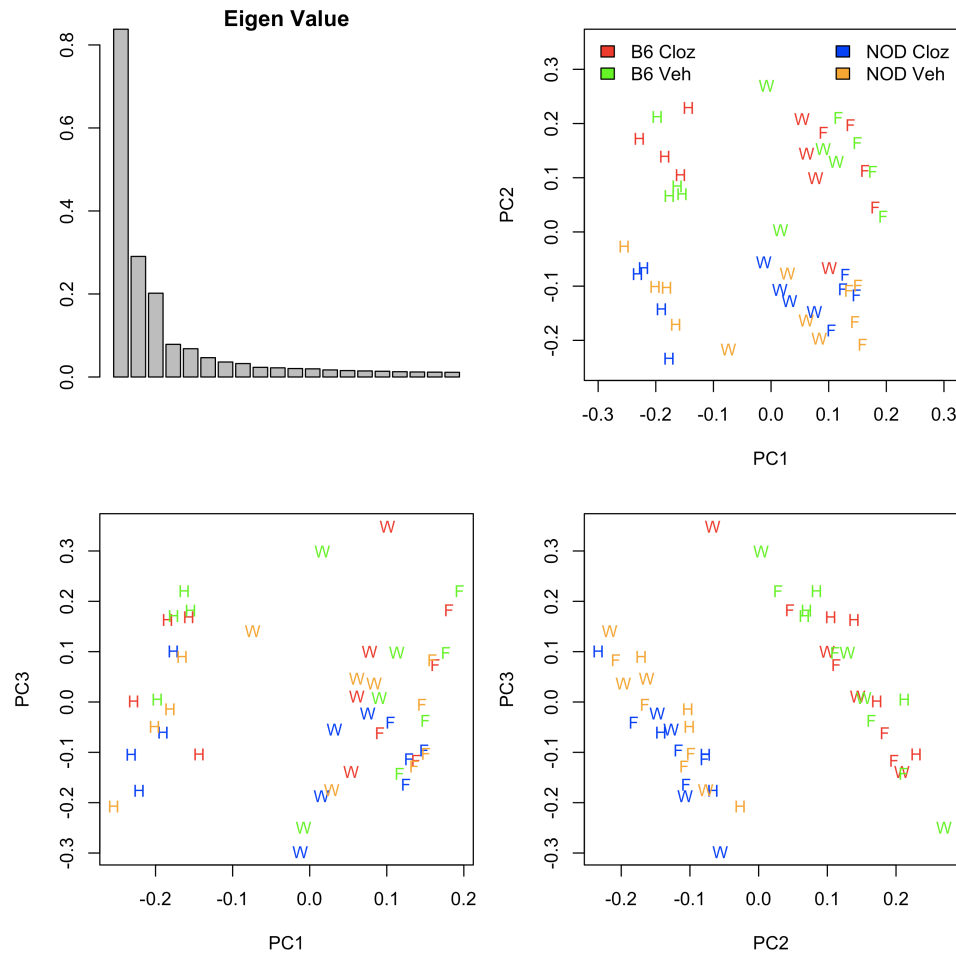

(B) R2 between the five covariates and the first 9 PCs. The covariate left/right indicate the sample is from left or right hemispheres.

|            |      |      |      |      |      |      |      |      |      |
|------------|------|------|------|------|------|------|------|------|------|
| left/right | 0    | 0    | 0    | 0.01 | 0.05 | 0    | 0.02 | 0    | 0.02 |
| drug       | 0    | 0    | 0.03 | 0.11 | 0    | 0.12 | 0.12 | 0.18 | 0.01 |
| strain     | 0.01 | 0.79 | 0.19 | 0.01 | 0    | 0    | 0    | 0    | 0    |
| region     | 0.94 | 0    | 0.02 | 0.04 | 0.07 | 0.01 | 0.39 | 0.02 | 0.01 |
| day        | 0.04 | 0.06 | 0.02 | 0    | 0.42 | 0    | 0.02 | 0.01 | 0.03 |
|            | PC1  | PC2  | PC3  | PC4  | PC5  | PC6  | PC7  | PC8  | PC9  |

Figure S5 PCA for gene expression from 1.0ST cartridge arrays.
