# Supplementary material for: Transcriptome Atlases of Mouse Brain Reveals Differential Expression Across Brain Regions and Genetic Backgrounds
Source: Oxford University Press journal article supplement (doi:10.1534/g3.111.001602), 2012-02-01
Supplement: 203_figures6.pdf [file 203_figures6.pdf]

(a) Eigenvalues and projection plots for the first three PCs.

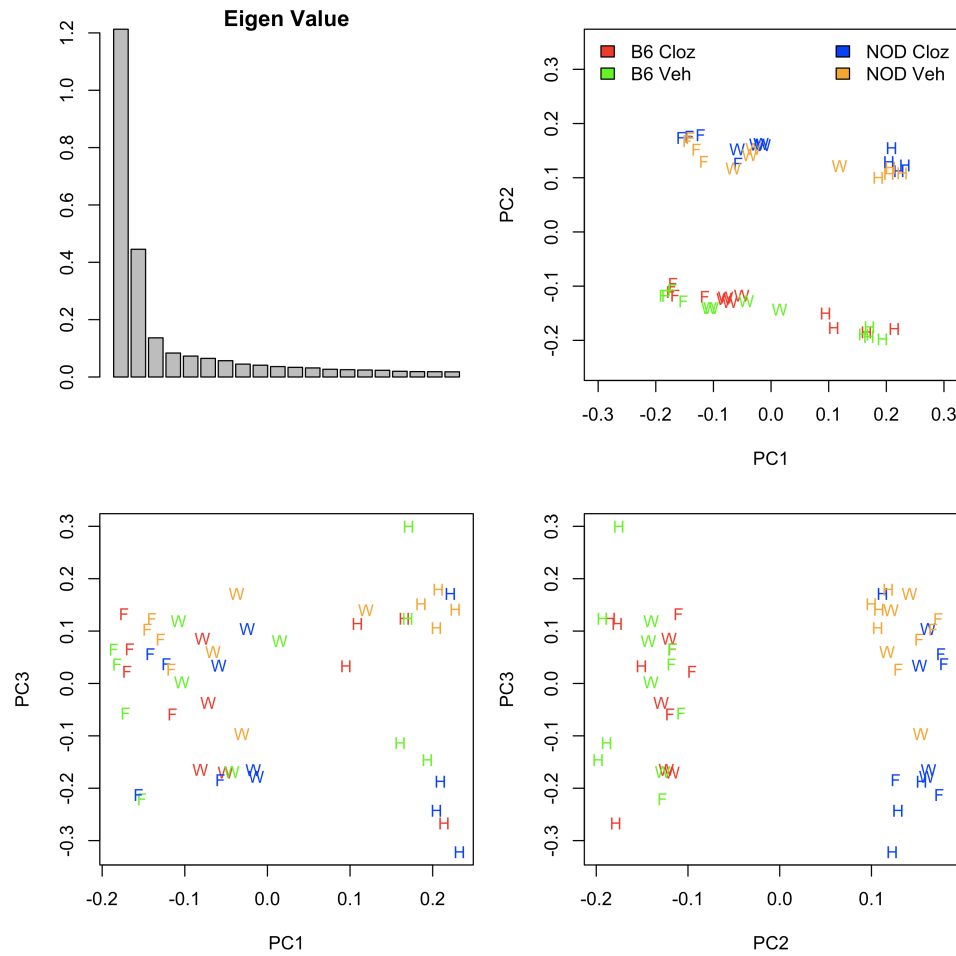

(b) R2 between the five covariates and the first 9 PCs.

|            |      |      |      |      |      |      |      |      |      |
|------------|------|------|------|------|------|------|------|------|------|
| left/right | 0    | 0    | 0.01 | 0    | 0.01 | 0.03 | 0    | 0    | 0.01 |
| drug       | 0    | 0    | 0.12 | 0.02 | 0.06 | 0.09 | 0.22 | 0.08 | 0.01 |
| strain     | 0.03 | 0.96 | 0    | 0    | 0    | 0    | 0    | 0    | 0    |
| region     | 0.92 | 0.02 | 0    | 0.13 | 0.07 | 0.08 | 0.1  | 0.1  | 0.08 |
| day        | 0.03 | 0.04 | 0.01 | 0.13 | 0    | 0.08 | 0.02 | 0.05 | 0    |
|            | PC 1 | PC 2 | PC 3 | PC 4 | PC 5 | PC 6 | PC 7 | PC 8 | PC 9 |

Figure S6 PCA for gene expression from 1.1ST peg arrays.
