# Supplementary material for: Transcriptome Atlases of Mouse Brain Reveals Differential Expression Across Brain Regions and Genetic Backgrounds
Source: Oxford University Press journal article supplement (doi:10.1534/g3.111.001602), 2012-02-01
Supplement: 203_figures12.pdf [file 203_figures12.pdf]

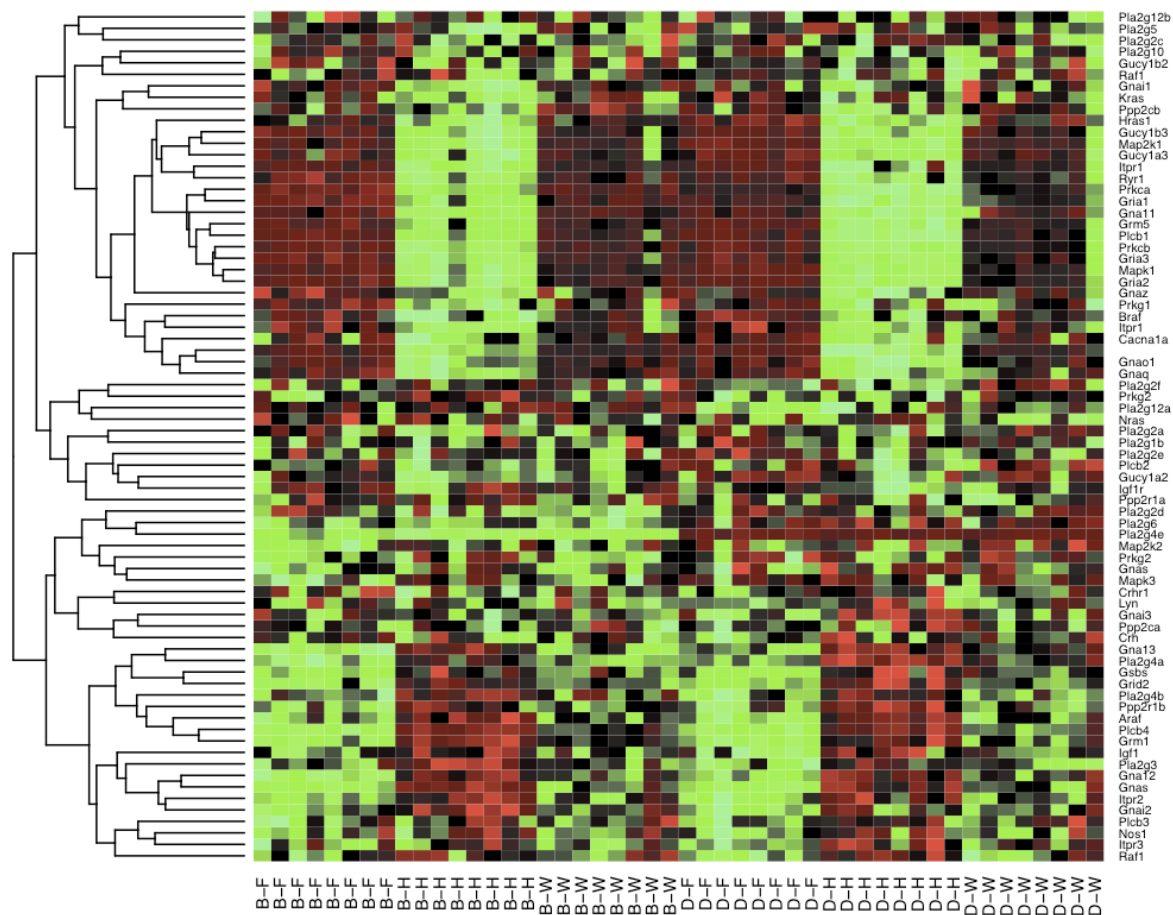

**Figure S12** Heatmap of the expression of pathway “Long-term depression”. Heatmap of the expression of the 76 probesets belonging to pathway “Long-term depression”. Each column of the heatmap corresponds to a sample and each row corresponds to a probeset. In the column labels, B and D indicates strain of B6 and NOD respectively, and F, H, and W indicate forebrain, hindbrain and whole brain, respectively.
