# Supplementary material for: Transcriptome Atlases of Mouse Brain Reveals Differential Expression Across Brain Regions and Genetic Backgrounds
Source: Oxford University Press journal article supplement (doi:10.1534/g3.111.001602), 2012-02-01
Supplement: 203_tables2.pdf [file 203_tables2.pdf]

**Table S2 FDR at different p-value cutoffs for 1.0ST array.**

| p-value | Forebrain vs. hindbrain |              |             | Whole brain vs. forebrain |             |              | NOD vs. B6  |              |             | Clozapine vs. vehicle |        |       | Interaction: hindbrain-NOD |             |              |
|---------|-------------------------|--------------|-------------|---------------------------|-------------|--------------|-------------|--------------|-------------|-----------------------|--------|-------|----------------------------|-------------|--------------|
|         | D                       | FD           | FDR         | D                         | FD          | FDR          | D           | FD           | FDR         | D                     | FD     | FDR   | D                          | FD          | FDR          |
| 0.05    | 7351                    | 888.2        | 0.121       | 2877                      | 1235.3      | 0.429        | 7446        | 893.9        | 0.12        | 3391                  | 1138.9 | 0.336 | 4196                       | 1109.9      | 0.265        |
| 0.04    | 6837                    | 710.6        | 0.104       | 2494                      | 988.2       | 0.396        | 6877        | 715.1        | 0.104       | 2898                  | 911.1  | 0.314 | 3733                       | 887.9       | 0.238        |
| 0.03    | 6213                    | 532.9        | 0.086       | 2088                      | 741.2       | 0.355        | 6275        | 536.3        | 0.085       | 2355                  | 683.3  | 0.29  | 3180                       | 665.9       | 0.209        |
| 0.02    | 5429                    | 355.3        | 0.065       | 1623                      | 494.1       | 0.304        | 5502        | 357.6        | 0.065       | 1772                  | 455.6  | 0.257 | 2585                       | 444         | 0.172        |
| 0.01    | <b>4401</b>             | <b>177.6</b> | <b>0.04</b> | 1125                      | 247.1       | 0.22         | <b>4465</b> | <b>178.8</b> | <b>0.04</b> | 1085                  | 227.8  | 0.21  | 1803                       | 222         | 0.123        |
| 0.009   | 4266                    | 159.9        | 0.037       | 1080                      | 222.4       | 0.206        | 4328        | 160.9        | 0.037       | 1005                  | 205    | 0.204 | 1710                       | 199.8       | 0.117        |
| 0.008   | 4119                    | 142.1        | 0.034       | 1010                      | 197.6       | 0.196        | 4168        | 143          | 0.034       | 924                   | 182.2  | 0.197 | 1619                       | 177.6       | 0.11         |
| 0.007   | 3964                    | 124.3        | 0.031       | 944                       | 172.9       | 0.183        | 4015        | 125.1        | 0.031       | 834                   | 159.4  | 0.191 | 1527                       | 155.4       | 0.102        |
| 0.006   | 3776                    | 106.6        | 0.028       | 881                       | 148.2       | 0.168        | 3860        | 107.3        | 0.028       | 753                   | 136.7  | 0.182 | 1406                       | 133.2       | 0.095        |
| 0.005   | 3610                    | 88.8         | 0.025       | 804                       | 123.5       | 0.154        | 3696        | 89.4         | 0.024       | 663                   | 113.9  | 0.172 | 1300                       | 111         | 0.085        |
| 0.004   | 3417                    | 71.1         | 0.021       | 726                       | 98.8        | 0.136        | 3467        | 71.5         | 0.021       | 560                   | 91.1   | 0.163 | 1179                       | 88.8        | 0.075        |
| 0.003   | 3161                    | 53.3         | 0.017       | 616                       | 74.1        | 0.12         | 3187        | 53.6         | 0.017       | 459                   | 68.3   | 0.149 | 1027                       | 66.6        | 0.065        |
| 0.002   | 2823                    | 35.5         | 0.013       | 498                       | 49.4        | 0.099        | 2854        | 35.8         | 0.013       | 347                   | 45.6   | 0.131 | <b>865</b>                 | <b>44.4</b> | <b>0.051</b> |
| 0.001   | 2351                    | 17.8         | 0.008       | 364                       | 24.7        | 0.068        | 2437        | 17.9         | 0.007       | 180                   | 22.8   | 0.127 | 672                        | 22.2        | 0.033        |
| 9e-04   | 2285                    | 16           | 0.007       | 355                       | 22.2        | 0.063        | 2365        | 16.1         | 0.007       | 167                   | 20.5   | 0.123 | 652                        | 20          | 0.031        |
| 8e-04   | 2212                    | 14.2         | 0.006       | 337                       | 19.8        | 0.059        | 2295        | 14.3         | 0.006       | 153                   | 18.2   | 0.119 | 622                        | 17.8        | 0.029        |
| 7e-04   | 2127                    | 12.4         | 0.006       | 316                       | 17.3        | 0.055        | 2233        | 12.5         | 0.006       | 135                   | 15.9   | 0.118 | 588                        | 15.5        | 0.026        |
| 6e-04   | 2034                    | 10.7         | 0.005       | <b>293</b>                | <b>14.8</b> | <b>0.051</b> | 2147        | 10.7         | 0.005       | 113                   | 13.7   | 0.121 | 555                        | 13.3        | 0.024        |
| 5e-04   | 1937                    | 8.9          | 0.005       | 273                       | 12.4        | 0.045        | 2051        | 8.9          | 0.004       | 92                    | 11.4   | 0.124 | 519                        | 11.1        | 0.021        |
| 4e-04   | 1811                    | 7.1          | 0.004       | 259                       | 9.9         | 0.038        | 1957        | 7.2          | 0.004       | 79                    | 9.1    | 0.115 | 482                        | 8.9         | 0.018        |
| 3e-04   | 1669                    | 5.3          | 0.003       | 231                       | 7.4         | 0.032        | 1828        | 5.4          | 0.003       | 61                    | 6.8    | 0.111 | 438                        | 6.7         | 0.015        |
| 2e-04   | 1521                    | 3.6          | 0.002       | 203                       | 4.9         | 0.024        | 1652        | 3.6          | 0.002       | 41                    | 4.6    | 0.112 | 378                        | 4.4         | 0.012        |
| 1e-04   | 1287                    | 1.8          | 0.001       | 140                       | 2.5         | 0.018        | 1386        | 1.8          | 0.001       | 23                    | 2.3    | 0.1   | 310                        | 2.2         | 0.007        |

For a p-value cutoff  $p$ , the expected number of false discoveries (FD) is  $\pi_0 N p$  ( $N$  is the total number of genes), the number of discoveries ( $D$ ) was the number of genes with p-values  $< p$ , and FDR is  $FD/D$ .
