# Supplementary material for: Transcriptome Atlases of Mouse Brain Reveals Differential Expression Across Brain Regions and Genetic Backgrounds
Source: Oxford University Press journal article supplement (doi:10.1534/g3.111.001602), 2012-02-01
Supplement: 203_tables3.pdf [file 203_tables3.pdf]

**Table S3 The 122 GO terms associated with brain region effects**

| GO ID      | GO type | Size | GO Term Name                                     | P-val   | P-val   |
|------------|---------|------|--------------------------------------------------|---------|---------|
|            |         |      |                                                  | F vs. H | W vs. H |
| GO:0006887 | BP      | 109  | exocytosis                                       | 0       | 0       |
| GO:0008283 | BP      | 737  | cell proliferation                               | 0       | 0       |
| GO:0016192 | BP      | 446  | vesicle-mediated transport                       | 0       | 0       |
| GO:0019226 | BP      | 250  | transmission of nerve impulse                    | 0       | 0       |
| GO:0005262 | MF      | 70   | calcium channel activity                         | 0       | 0       |
| GO:0007155 | BP      | 614  | cell adhesion                                    | 0       | 2e-04   |
| GO:0022610 | BP      | 614  | biological adhesion                              | 0       | 2e-04   |
| GO:0048489 | BP      | 28   | synaptic vesicle transport                       | 0       | 2e-04   |
| GO:0000267 | CC      | 607  | cell fraction                                    | 0       | 2e-04   |
| GO:0042391 | BP      | 108  | regulation of membrane potential                 | 0       | 4e-04   |
| GO:0051128 | BP      | 281  | regulation of cellular component organization    | 0       | 4e-04   |
| GO:0007275 | BP      | 2721 | multicellular organismal development             | 0       | 6e-04   |
| GO:0021987 | BP      | 36   | cerebral cortex development                      | 0       | 6e-04   |
| GO:0016788 | MF      | 666  | hydrolase activity, acting on ester bonds        | 0       | 6e-04   |
| GO:0042578 | MF      | 324  | phosphoric ester hydrolase activity              | 0       | 6e-04   |
| GO:0007267 | BP      | 336  | cell-cell signaling                              | 0       | 8e-04   |
| GO:0016790 | MF      | 102  | thiolester hydrolase activity                    | 0       | 8e-04   |
| GO:0031344 | BP      | 54   | regulation of cell projection organization       | 0       | 0.001   |
| GO:0048869 | BP      | 1765 | cellular developmental process                   | 0       | 0.001   |
| GO:0008066 | MF      | 29   | glutamate receptor activity                      | 0       | 0.001   |
| GO:0016044 | BP      | 276  | cellular membrane organization                   | 0       | 0.0014  |
| GO:0042063 | BP      | 50   | gliogenesis                                      | 0       | 0.0014  |
| GO:0007156 | BP      | 78   | homophilic cell adhesion                         | 0       | 0.0016  |
| GO:0022603 | BP      | 200  | regulation of anatomical structure morphogenesis | 0       | 0.0018  |
| GO:0045211 | CC      | 126  | postsynaptic membrane                            | 0       | 0.002   |
| GO:0006575 | BP      | 159  | cellular amino acid derivative metabolic process | 0       | 0.0022  |
| GO:0022604 | BP      | 98   | regulation of cell morphogenesis                 | 0       | 0.0024  |
| GO:0006897 | BP      | 189  | endocytosis                                      | 0       | 0.0028  |
| GO:0010324 | BP      | 189  | membrane invagination                            | 0       | 0.0028  |
| GO:0050770 | BP      | 39   | regulation of axonogenesis                       | 0       | 0.0032  |
| GO:0051239 | BP      | 767  | regulation of multicellular organismal process   | 0       | 0.0032  |
| GO:0008081 | MF      | 69   | phosphoric diester hydrolase activity            | 0       | 0.0032  |
| GO:0006576 | BP      | 102  | cellular biogenic amine metabolic process        | 0       | 0.0042  |
| GO:0007270 | BP      | 37   | nerve-nerve synaptic transmission                | 0       | 0.0048  |
| GO:0048856 | BP      | 2274 | anatomical structure development                 | 0       | 0.0048  |

|            |    |      |                                                          |       |        |
|------------|----|------|----------------------------------------------------------|-------|--------|
| GO:0048468 | BP | 801  | cell development                                         | 0     | 0.0056 |
| GO:0048168 | BP | 21   | regulation of neuronal synaptic plasticity               | 0     | 0.0074 |
| GO:0051493 | BP | 89   | regulation of cytoskeleton organization                  | 0     | 0.0076 |
| GO:0030041 | BP | 53   | actin filament polymerization                            | 0     | 0.0086 |
| GO:0016337 | BP | 178  | cell-cell adhesion                                       | 0     | 0.009  |
| GO:0004620 | MF | 61   | phospholipase activity                                   | 0     | 0.0096 |
| GO:0005267 | MF | 132  | potassium channel activity                               | 0     | 0.0126 |
| GO:0000902 | BP | 360  | cell morphogenesis                                       | 0     | 0.0134 |
| GO:0008092 | MF | 395  | cytoskeletal protein binding                             | 0     | 0.0146 |
| GO:0048646 | BP | 355  | anatomical structure formation involved in morphogenesis | 0     | 0.0148 |
| GO:0032989 | BP | 398  | cellular component morphogenesis                         | 0     | 0.015  |
| GO:0065003 | BP | 330  | macromolecular complex assembly                          | 0     | 0.0162 |
| GO:0005886 | CC | 2802 | plasma membrane                                          | 0     | 0.0182 |
| GO:0044459 | CC | 1345 | plasma membrane part                                     | 0     | 0.0186 |
| GO:0007015 | BP | 95   | actin filament organization                              | 0     | 0.0188 |
| GO:0030036 | BP | 186  | actin cytoskeleton organization                          | 0     | 0.022  |
| GO:0003779 | MF | 290  | actin binding                                            | 0     | 0.026  |
| GO:0034622 | BP | 275  | cellular macromolecular complex assembly                 | 0     | 0.027  |
| GO:0021954 | BP | 33   | central nervous system neuron development                | 0     | 0.0308 |
| GO:0032956 | BP | 59   | regulation of actin cytoskeleton organization            | 0     | 0.0316 |
| GO:0030029 | BP | 199  | actin filament-based process                             | 0     | 0.0336 |
| GO:0010926 | BP | 791  |                                                          | 0     | 0.0346 |
| GO:0016298 | MF | 82   | lipase activity                                          | 0     | 0.035  |
| GO:0060284 | BP | 145  | regulation of cell development                           | 0     | 0.0354 |
| GO:0019199 | MF | 69   | transmembrane receptor protein kinase activity           | 0     | 0.0404 |
| GO:0030155 | BP | 86   | regulation of cell adhesion                              | 0     | 0.0438 |
| GO:0022607 | BP | 486  | cellular component assembly                              | 0     | 0.0448 |
| GO:0051960 | BP | 138  | regulation of nervous system development                 | 0     | 0.0468 |
| GO:0001725 | CC | 21   | stress fiber                                             | 0     | 0.0516 |
| GO:0004714 | MF | 56   | transmembrane receptor protein tyrosine kinase activity  | 0     | 0.052  |
| GO:0001525 | BP | 147  | angiogenesis                                             | 0     | 0.0554 |
| GO:0050767 | BP | 124  | regulation of neurogenesis                               | 0     | 0.0592 |
| GO:0017016 | MF | 61   | Ras GTPase binding                                       | 0     | 0.0638 |
| GO:0007519 | BP | 91   | skeletal muscle tissue development                       | 0     | 0.0642 |
| GO:0060538 | BP | 92   | skeletal muscle organ development                        | 0     | 0.0684 |
| GO:0045664 | BP | 99   | regulation of neuron differentiation                     | 0     | 0.0704 |
| GO:0017048 | MF | 22   | Rho GTPase binding                                       | 0     | 0.1924 |
| GO:0044456 | CC | 197  | synapse part                                             | 2e-04 | 0      |
| GO:0004721 | MF | 168  | phosphoprotein phosphatase activity                      | 4e-04 | 0      |

|            |    |      |                                                        |        |   |
|------------|----|------|--------------------------------------------------------|--------|---|
| GO:0007268 | BP | 209  | synaptic transmission                                  | 6e-04  | 0 |
| GO:0032879 | BP | 361  | regulation of localization                             | 6e-04  | 0 |
| GO:0070838 | BP | 140  | divalent metal ion transport                           | 6e-04  | 0 |
| GO:0030425 | CC | 63   | dendrite                                               | 8e-04  | 0 |
| GO:0016791 | MF | 256  | phosphatase activity                                   | 8e-04  | 0 |
| GO:0006816 | BP | 137  | calcium ion transport                                  | 0.001  | 0 |
| GO:0044057 | BP | 162  | regulation of system process                           | 0.001  | 0 |
| GO:0006461 | BP | 196  | protein complex assembly                               | 0.0012 | 0 |
| GO:0070271 | BP | 196  | protein complex biogenesis                             | 0.0012 | 0 |
| GO:0001505 | BP | 72   | regulation of neurotransmitter levels                  | 0.0016 | 0 |
| GO:0007269 | BP | 48   | neurotransmitter secretion                             | 0.0018 | 0 |
| GO:0016358 | BP | 48   | dendrite development                                   | 0.0022 | 0 |
| GO:0051049 | BP | 212  | regulation of transport                                | 0.0032 | 0 |
| GO:0030665 | CC | 25   | clathrin coated vesicle membrane                       | 0.0032 | 0 |
| GO:0050673 | BP | 79   | epithelial cell proliferation                          | 0.0034 | 0 |
| GO:0046903 | BP | 264  | secretion                                              | 0.004  | 0 |
| GO:0032940 | BP | 235  | secretion by cell                                      | 0.0042 | 0 |
| GO:0044448 | CC | 65   | cell cortex part                                       | 0.0042 | 0 |
| GO:0051641 | BP | 732  | cellular localization                                  | 0.0044 | 0 |
| GO:0043005 | CC | 218  | neuron projection                                      | 0.0044 | 0 |
| GO:0016311 | BP | 148  | dephosphorylation                                      | 0.0066 | 0 |
| GO:0043112 | BP | 29   | receptor metabolic process                             | 0.0074 | 0 |
| GO:0043687 | BP | 1117 | post-translational protein modification                | 0.0106 | 0 |
| GO:0030136 | CC | 75   | clathrin-coated vesicle                                | 0.0106 | 0 |
| GO:0005097 | MF | 43   | Rab GTPase activator activity                          | 0.0108 | 0 |
| GO:0050768 | BP | 39   | negative regulation of neurogenesis                    | 0.012  | 0 |
| GO:0005516 | MF | 112  | calmodulin binding                                     | 0.0124 | 0 |
| GO:0003001 | BP | 119  | generation of a signal involved in cell-cell signaling | 0.0126 | 0 |
| GO:0051046 | BP | 96   | regulation of secretion                                | 0.0128 | 0 |
| GO:0005057 | MF | 93   | receptor signaling protein activity                    | 0.0136 | 0 |
| GO:0008021 | CC | 59   | synaptic vesicle                                       | 0.0152 | 0 |
| GO:0046474 | BP | 45   | glycerophospholipid biosynthetic process               | 0.0184 | 0 |
| GO:0030662 | CC | 38   | coated vesicle membrane                                | 0.0184 | 0 |
| GO:0030135 | CC | 90   | coated vesicle                                         | 0.0194 | 0 |
| GO:0060341 | BP | 117  | regulation of cellular localization                    | 0.0226 | 0 |
| GO:0016529 | CC | 34   | sarcoplasmic reticulum                                 | 0.027  | 0 |
| GO:0009056 | BP | 1528 | catabolic process                                      | 0.03   | 0 |
| GO:0003713 | MF | 72   | transcription coactivator activity                     | 0.0312 | 0 |
| GO:0016528 | CC | 36   | sarcoplasm                                             | 0.0356 | 0 |
| GO:0044248 | BP | 890  | cellular catabolic process                             | 0.0392 | 0 |

|            |    |      |                                                |        |   |
|------------|----|------|------------------------------------------------|--------|---|
| GO:0007416 | BP | 24   | synapse assembly                               | 0.0478 | 0 |
| GO:0048873 | BP | 23   | homeostasis of number of cells within a tissue | 0.0716 | 0 |
| GO:0017157 | BP | 24   | regulation of exocytosis                       | 0.1088 | 0 |
| GO:0044444 | CC | 4121 | cytoplasmic part                               | 0.1206 | 0 |
| GO:0016569 | BP | 68   | covalent chromatin modification                | 0.1242 | 0 |
| GO:0016570 | BP | 64   | histone modification                           | 0.1392 | 0 |
| GO:0048872 | BP | 137  | homeostasis of number of cells                 | 0.1614 | 0 |
| GO:0001894 | BP | 56   | tissue homeostasis                             | 0.1778 | 0 |

---

The columns “P-val F vs. H” and “P-val W vs. H” are the p-values comparing the expression of forebrain vs. hindbrain, and comparing whole brain vs. hindbrain, respectively.
