# Supplementary material for: Transcriptome Atlases of Mouse Brain Reveals Differential Expression Across Brain Regions and Genetic Backgrounds
Source: PubMed Central journal article supplement (PMC3284328; doi:10.1534/g3.111.001602), 2012-02-01
Supplement: supp_2.2.203_FigureS9.pdf [file supp_2.2.203_FigureS9.pdf]

(a) Cross-platform correlations and mean expression level and standard deviations.

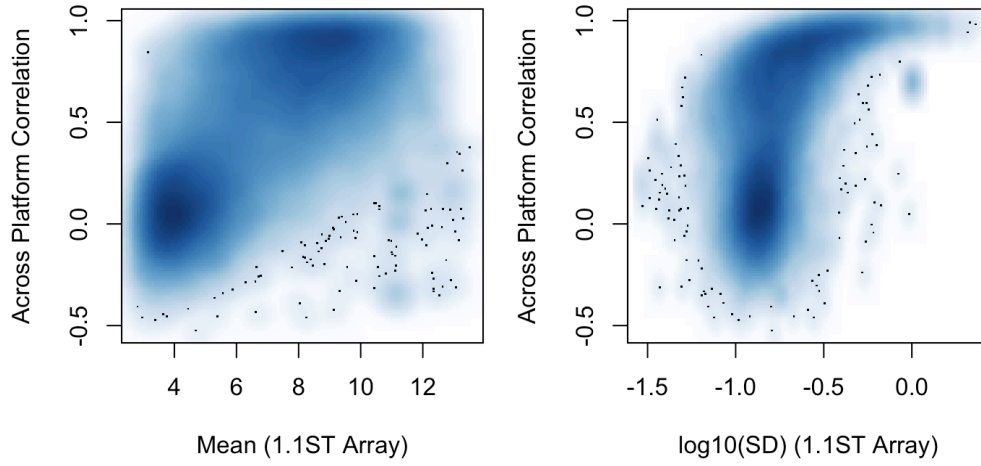

(b) The overlap of the differentially expressed genes across the two platforms.

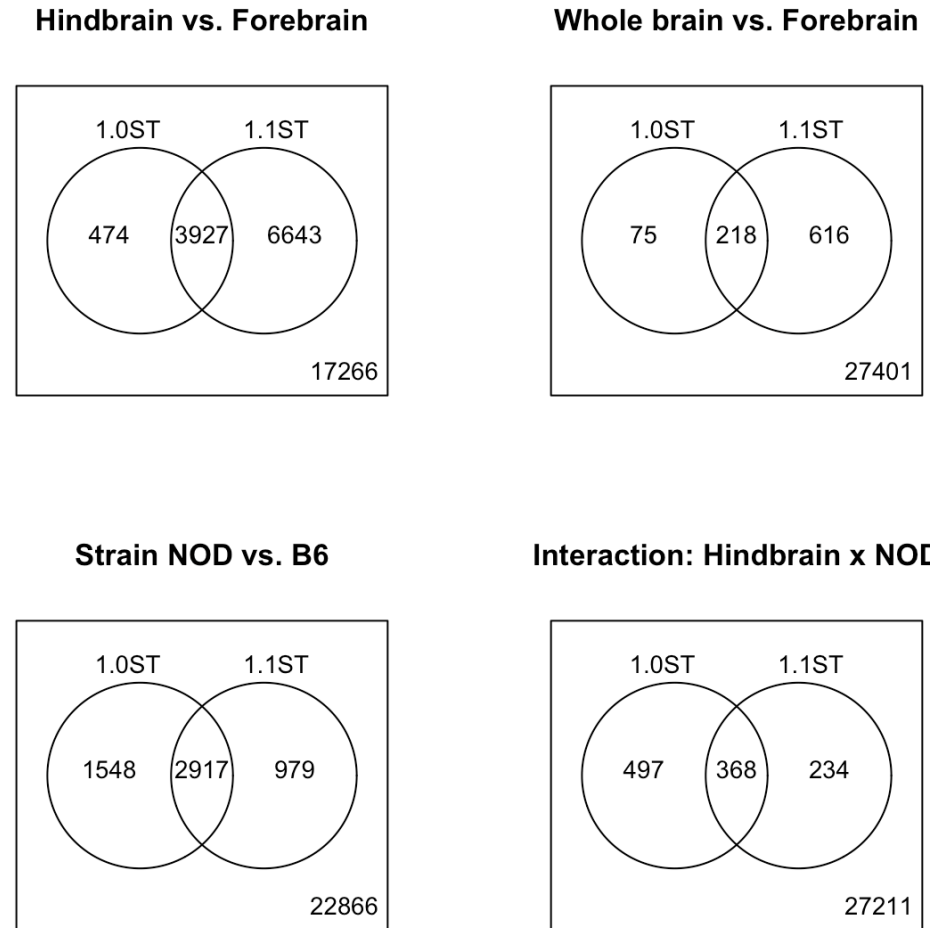

**Figure S9** Comparisons of two platforms (II).
