# Supplementary material for: Transcriptome Atlases of Mouse Brain Reveals Differential Expression Across Brain Regions and Genetic Backgrounds
Source: PubMed Central journal article supplement (PMC3284328; doi:10.1534/g3.111.001602), 2012-02-01
Supplement: supp_2.2.203_FigureS14.pdf [file supp_2.2.203_FigureS14.pdf]

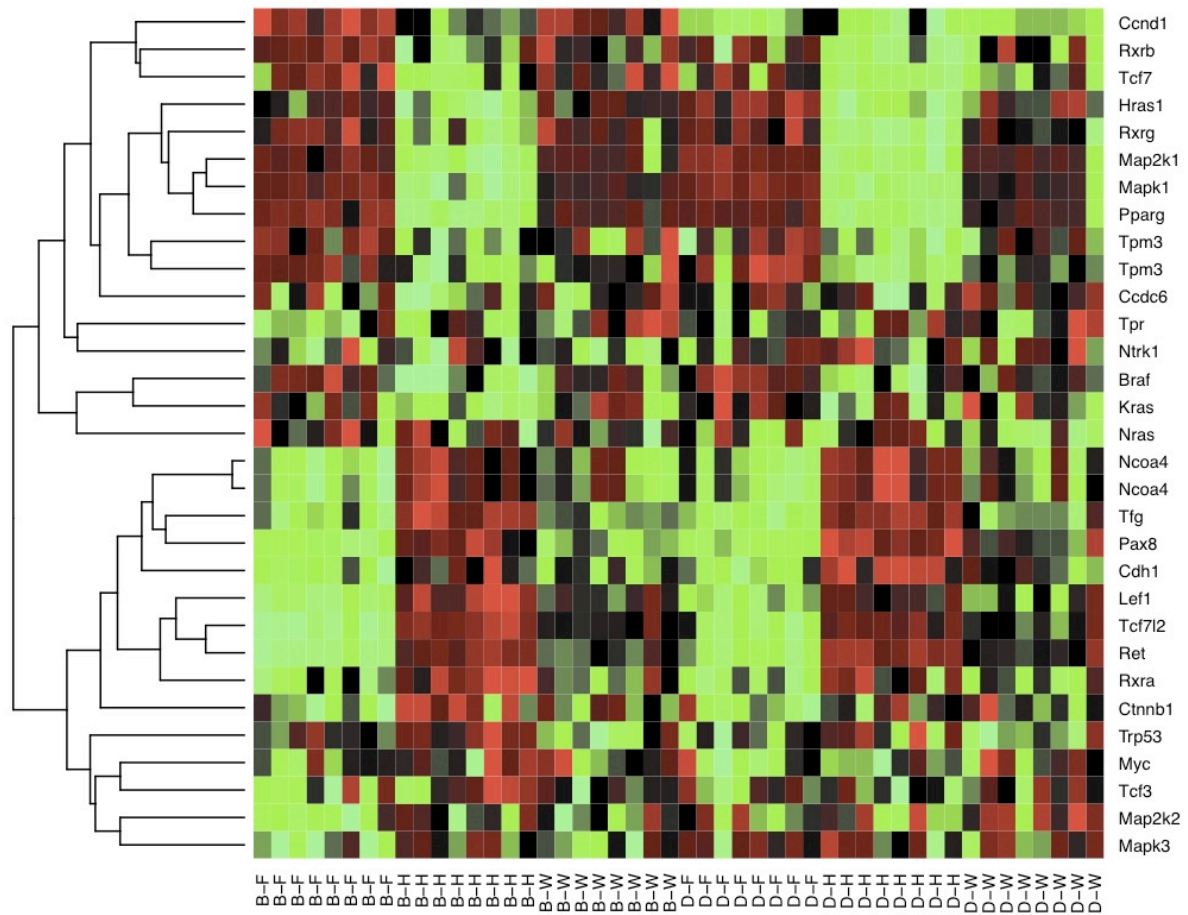

**Figure S14** Heatmap of the expression of pathway “Thyroid cancer”.
