# Supplementary material for: Transcriptome Atlases of Mouse Brain Reveals Differential Expression Across Brain Regions and Genetic Backgrounds
Source: PubMed Central journal article supplement (PMC3284328; doi:10.1534/g3.111.001602), 2012-02-01
Supplement: supp_2.2.203_TableS1.pdf [file supp_2.2.203_TableS1.pdf]

**Tables**

**Table S1 FDR at different p-value cutoffs for 1.1ST array.**

| p-value | Forebrain vs. hindbrain |              |              | Whole brain vs. forebrain |             |              | NOD vs. B6  |              |              | Clozapine vs. vehicle |        |       | Interaction: hindbrain-NOD |             |              |
|---------|-------------------------|--------------|--------------|---------------------------|-------------|--------------|-------------|--------------|--------------|-----------------------|--------|-------|----------------------------|-------------|--------------|
|         | D                       | FD           | FDR          | D                         | FD          | FDR          | D           | FD           | FDR          | D                     | FD     | FDR   | D                          | FD          | FDR          |
| 0.05    | 11141                   | 680.5        | 0.061        | 4128                      | 1093.9      | 0.265        | 6666        | 943.4        | 0.142        | 2418                  | 1259   | 0.521 | 4071                       | 1104.7      | 0.271        |
| 0.04    | <b>10570</b>            | <b>544.4</b> | <b>0.052</b> | 3654                      | 875.1       | 0.239        | 6099        | 754.7        | 0.124        | 2010                  | 1007.2 | 0.501 | 3564                       | 883.8       | 0.248        |
| 0.03    | 9910                    | 408.3        | 0.041        | 3120                      | 656.3       | 0.21         | 5495        | 566          | 0.103        | 1575                  | 755.4  | 0.48  | 3032                       | 662.8       | 0.219        |
| 0.02    | 9102                    | 272.2        | 0.03         | 2508                      | 437.6       | 0.174        | 4784        | 377.4        | 0.079        | 1125                  | 503.6  | 0.448 | 2457                       | 441.9       | 0.18         |
| 0.01    | 7954                    | 136.1        | 0.017        | 1745                      | 218.8       | 0.125        | <b>3896</b> | <b>188.7</b> | <b>0.048</b> | 638                   | 251.8  | 0.395 | 1697                       | 220.9       | 0.13         |
| 0.009   | 7810                    | 122.5        | 0.016        | 1646                      | 196.9       | 0.12         | 3759        | 169.8        | 0.045        | 588                   | 226.6  | 0.385 | 1596                       | 198.8       | 0.125        |
| 0.008   | 7648                    | 108.9        | 0.014        | 1562                      | 175         | 0.112        | 3628        | 150.9        | 0.042        | 530                   | 201.4  | 0.38  | 1506                       | 176.8       | 0.117        |
| 0.007   | 7455                    | 95.3         | 0.013        | 1468                      | 153.1       | 0.104        | 3496        | 132.1        | 0.038        | 472                   | 176.3  | 0.374 | 1411                       | 154.7       | 0.11         |
| 0.006   | 7219                    | 81.7         | 0.011        | 1372                      | 131.3       | 0.096        | 3338        | 113.2        | 0.034        | 412                   | 151.1  | 0.367 | 1304                       | 132.6       | 0.102        |
| 0.005   | 7005                    | 68.0         | 0.01         | 1245                      | 109.4       | 0.088        | 3178        | 94.3         | 0.03         | 346                   | 125.9  | 0.364 | 1195                       | 110.5       | 0.092        |
| 0.004   | 6748                    | 54.4         | 0.008        | 1103                      | 87.5        | 0.079        | 3029        | 75.5         | 0.025        | 274                   | 100.7  | 0.368 | 1065                       | 88.4        | 0.083        |
| 0.003   | 6403                    | 40.8         | 0.006        | 993                       | 65.6        | 0.066        | 2757        | 56.6         | 0.021        | 200                   | 75.5   | 0.378 | 919                        | 66.3        | 0.072        |
| 0.002   | 5976                    | 27.2         | 0.005        | <b>834</b>                | <b>43.8</b> | <b>0.053</b> | 2470        | 37.7         | 0.015        | 142                   | 50.4   | 0.355 | <b>778</b>                 | <b>44.2</b> | <b>0.057</b> |
| 0.001   | 5330                    | 13.6         | 0.003        | 625                       | 21.9        | 0.035        | 2087        | 18.9         | 0.009        | 61                    | 25.2   | 0.413 | 602                        | 22.1        | 0.037        |
| 9e-04   | 5245                    | 12.2         | 0.002        | 593                       | 19.7        | 0.033        | 2040        | 17           | 0.008        | 53                    | 22.7   | 0.428 | 579                        | 19.9        | 0.034        |
| 8e-04   | 5135                    | 10.9         | 0.002        | 563                       | 17.5        | 0.031        | 1975        | 15.1         | 0.008        | 48                    | 20.1   | 0.419 | 551                        | 17.7        | 0.032        |
| 7e-04   | 5026                    | 9.5          | 0.002        | 543                       | 15.3        | 0.028        | 1911        | 13.2         | 0.007        | 46                    | 17.6   | 0.383 | 526                        | 15.5        | 0.029        |
| 6e-04   | 4902                    | 8.2          | 0.002        | 510                       | 13.1        | 0.026        | 1853        | 11.3         | 0.006        | 38                    | 15.1   | 0.397 | 501                        | 13.3        | 0.027        |
| 5e-04   | 4764                    | 6.8          | 0.001        | 466                       | 10.9        | 0.023        | 1766        | 9.4          | 0.005        | 33                    | 12.6   | 0.382 | 453                        | 11          | 0.024        |
| 4e-04   | 4598                    | 5.4          | 0.001        | 427                       | 8.8         | 0.021        | 1663        | 7.5          | 0.005        | 24                    | 10.1   | 0.421 | 407                        | 8.8         | 0.022        |
| 3e-04   | 4375                    | 4.1          | 0.001        | 397                       | 6.6         | 0.017        | 1545        | 5.7          | 0.004        | 17                    | 7.6    | 0.447 | 364                        | 6.6         | 0.018        |
| 2e-04   | 4112                    | 2.7          | 0.001        | 339                       | 4.4         | 0.013        | 1402        | 3.8          | 0.003        | 10                    | 5      | 0.5   | 294                        | 4.4         | 0.015        |
| 1e-04   | 3683                    | 1.4          | 0            | 275                       | 2.2         | 0.008        | 1206        | 1.9          | 0.002        | 4                     | 2.5    | 0.625 | 237                        | 2.2         | 0.009        |

For a p-value cutoff  $p$ , the expected number of false discoveries (FD) is  $\pi_0 N p$  ( $N$  is the total number of transcripts), the number of discoveries ( $D$ ) was the number of transcripts with p-values  $< p$ , and FDR is calculated as  $FD/D$ .
