# Supplementary material for: Transcriptome Atlases of Mouse Brain Reveals Differential Expression Across Brain Regions and Genetic Backgrounds
Source: PubMed Central journal article supplement (PMC3284328; doi:10.1534/g3.111.001602), 2012-02-01
Supplement: supp_2.2.203_TableS4.pdf [file supp_2.2.203_TableS4.pdf]

**Table S4 The 41 GO terms associated with strain effect in hindbrain.**

| GO ID      | GO type | GO name                                                         | Size | P-value  |
|------------|---------|-----------------------------------------------------------------|------|----------|
| GO:0000323 | CC      | lytic vacuole                                                   | 160  | 0        |
| GO:0005764 | CC      | lysosome                                                        | 160  | 0        |
| GO:0044456 | CC      | synapse part                                                    | 197  | 0        |
| GO:0008076 | CC      | voltage-gated potassium channel complex                         | 57   | 0        |
| GO:0034705 | CC      | potassium channel complex                                       | 57   | 0        |
| GO:0030135 | CC      | coated vesicle                                                  | 90   | 0        |
| GO:0030136 | CC      | clathrin-coated vesicle                                         | 75   | 0        |
| GO:0005789 | CC      | endoplasmic reticulum membrane                                  | 99   | 0        |
| GO:0008021 | CC      | synaptic vesicle                                                | 59   | 0        |
| GO:0005768 | CC      | endosome                                                        | 242  | 8.00e-04 |
| GO:0045202 | CC      | synapse                                                         | 311  | 8.00e-04 |
| GO:0044432 | CC      | endoplasmic reticulum part                                      | 118  | 8.00e-04 |
| GO:0042175 | CC      | nuclear envelope-endoplasmic reticulum network                  | 103  | 0.0012   |
| GO:0044463 | CC      | cell projection part                                            | 103  | 0.0016   |
| GO:0005773 | CC      | vacuole                                                         | 187  | 0.0016   |
| GO:0045211 | CC      | postsynaptic membrane                                           | 126  | 0.0016   |
| GO:0031988 | CC      | membrane-bounded vesicle                                        | 251  | 0.002    |
| GO:0016023 | CC      | cytoplasmic membrane-bounded vesicle                            | 244  | 0.002    |
| GO:0043025 | CC      | neuronal cell body                                              | 84   | 0.002    |
| GO:0005856 | CC      | cytoskeleton                                                    | 1008 | 0.0029   |
| GO:0005097 | MF      | Rab GTPase activator activity                                   | 43   | 0        |
| GO:0016301 | MF      | kinase activity                                                 | 846  | 0        |
| GO:0016627 | MF      | oxidoreductase activity, acting on the CH-CH group of donors    | 48   | 0        |
| GO:0051536 | MF      | iron-sulfur cluster binding                                     | 48   | 0        |
| GO:0051540 | MF      | metal cluster binding                                           | 48   | 0        |
| GO:0005509 | MF      | calcium ion binding                                             | 829  | 0        |
| GO:0046873 | MF      | metal ion transmembrane transporter activity                    | 292  | 0        |
| GO:0031406 | MF      | carboxylic acid binding                                         | 69   | 0        |
| GO:0005215 | MF      | transporter activity                                            | 1048 | 0        |
| GO:0016772 | MF      | transferase activity, transferring phosphorus-containing groups | 981  | 4.00e-04 |
| GO:0019842 | MF      | vitamin binding                                                 | 119  | 4.00e-04 |
| GO:0016597 | MF      | amino acid binding                                              | 25   | 4.00e-04 |
| GO:0016773 | MF      | phosphotransferase activity, alcohol group as acceptor          | 698  | 8.00e-04 |
| GO:0005267 | MF      | potassium channel activity                                      | 132  | 8.00e-04 |
| GO:0005249 | MF      | voltage-gated potassium channel activity                        | 85   | 8.00e-04 |
| GO:0022843 | MF      | voltage-gated cation channel activity                           | 132  | 8.00e-04 |
| GO:0005261 | MF      | cation channel activity                                         | 252  | 8.00e-04 |
