# Supplementary material for: Transcriptome Atlases of Mouse Brain Reveals Differential Expression Across Brain Regions and Genetic Backgrounds
Source: PubMed Central journal article supplement (PMC3284328; doi:10.1534/g3.111.001602), 2012-02-01
Supplement: supp_2.2.203_TableS5.pdf [file supp_2.2.203_TableS5.pdf]

**Table S5 The 35 pathways associated with brain region effect.**

| Pathway ID | Size | Pathway Name                                           | P-val F vs. H | P-val W vs. H |
|------------|------|--------------------------------------------------------|---------------|---------------|
| 05218      | 75   | Melanoma                                               | 2e-04         | 0.0016        |
| 04720      | 77   | Long-term potentiation                                 | 8e-04         | 2e-04         |
| 00562      | 55   | Inositol phosphate metabolism                          | 8e-04         | 0.0036        |
| 05216      | 31   | Thyroid cancer                                         | 0.0018        | 0.0028        |
| 04730      | 76   | Long-term depression                                   | 0.0026        | 0             |
| 04020      | 204  | Calcium signaling pathway                              | 0.003         | 0             |
| 04270      | 133  | Vascular smooth muscle contraction                     | 0.0036        | 0.0024        |
| 04810      | 224  | Regulation of actin cytoskeleton                       | 0             | 0.0064        |
| 04360      | 140  | Axon guidance                                          | 0             | 0.0116        |
| 00500      | 36   | Starch and sucrose metabolism                          | 0             | 0.2154        |
| 04540      | 95   | Gap junction                                           | 6e-04         | 0.0088        |
| 04520      | 87   | Adherens junction                                      | 8e-04         | 0.0228        |
| 01040      | 28   | Biosynthesis of unsaturated fatty acids                | 0.001         | 0.0368        |
| 04510      | 209  | Focal adhesion                                         | 0.0014        | 0.0306        |
| 04320      | 22   | Dorso-ventral axis formation                           | 0.0016        | 0.0536        |
| 00512      | 29   | O-Glycan biosynthesis                                  | 0.0026        | 0.2054        |
| 04010      | 287  | MAPK signaling pathway                                 | 0.0028        | 0.0056        |
| 04920      | 71   | Adipocytokine signaling pathway                        | 0.003         | 0.116         |
| 04070      | 79   | Phosphatidylinositol signaling system                  | 0.0036        | 0.0042        |
| 04080      | 260  | Neuroactive ligand-receptor interaction                | 0.004         | 0.0142        |
| 00380      | 41   | Tryptophan metabolism                                  | 0.004         | 0.0672        |
| 05412      | 83   | Arrhythmogenic right ventricular cardiomyopathy (ARVC) | 0.0048        | 4e-04         |
| 04916      | 105  | Melanogenesis                                          | 0.0076        | 4e-04         |
| 04912      | 105  | GnRH signaling pathway                                 | 0.0084        | 0.0034        |
| 00564      | 70   | Glycerophospholipid metabolism                         | 0.0104        | 0.001         |
| 05214      | 70   | Glioma                                                 | 0.0166        | 0.0022        |
| 04144      | 221  | Endocytosis                                            | 0.0188        | 0.0036        |
| 00563      | 25   | Glycosylphosphatidylinositol(GPI)-anchor biosynthesis  | 0.0206        | 0.001         |
| 04512      | 83   | ECM-receptor interaction                               | 0.0222        | 0.002         |
| 05410      | 92   | Hypertrophic cardiomyopathy (HCM)                      | 0.0408        | 0.0012        |
| 00620      | 50   | Pyruvate metabolism                                    | 0.044         | 0.0016        |
| 00310      | 45   | Lysine degradation                                     | 0.072         | 0             |
| 04260      | 89   | Cardiac muscle contraction                             | 0.1026        | 0.0014        |
| 04514      | 159  | Cell adhesion molecules (CAMs)                         | 0.1278        | 0.0026        |
| 04662      | 90   | B cell receptor signaling pathway                      | 0.5024        | 0.0034        |

The columns "P-val F vs. H" and "P-val W vs. H" are the p-values comparing the expression of forebrain vs. hindbrain, and comparing whole brain vs. hindbrain, respectively.
